# Supplementary material for: Exploring Semi-Quantitative Metagenomic Studies Using Oxford Nanopore Sequencing: A Computational and Experimental Protocol
Source: Genes (Basel). 2021 Sep 25;12(10):1496. doi: 10.3390/genes12101496 (PMC8536095; doi:10.3390/genes12101496)
Supplement: Supplementary file 1 [file genes-12-01496-s001.zip › Supplemental Tables.xlsx]

## Sheet: TableLegends
TableS1	Number of reads generated for the 250 simulated samples with CAMISIM.
TableS2	Compositional profile of the 250 simulated samples based on 506 reference genomes used for CAMISIM simulations. Columns 1 to 5 corresponds to reference genomic information of the 506 genomes used in the simulations. Columns 6 to 255 corresponds to the relative abundances of the 506 reference genomes in the 250 simulated samples based on 10 reference pareto distributions (M1-M10) and 5 different s…
TableS3	Summary of the results of nanopore read alignments against 506 reference genomes in 250 simulated samples. For each sample is provided the mean, median standard deviation and standard error of read lengths of aligned and unaligned reads (class column)
TableS4	Comparison of taxonomic features based on MGS quantification from IGC gene catalog between Nanopore quantifications and Illumina and Solid quantifications. For each taxonomic features is reported the Spearman correlation between pairwise abundance estimates (comparison column), the pvalue and the adjusted qvalue for multiple comparisons in each level of comparison column, and the prevalence of th…
TableS5	Improvement of DNA yield and quality with the Optimized Invitrogen protocol. NanoDrop data estimation of the amount of DNA and protein contamination given by the 260:280 ratio and by impurities and solvent contamination estimated by the 260:230 ratio (n = 6, Wilcoxon test).

## Sheet: TableS1
Sample	Reads	ReferenceParetoDistribution	SequencingDepth	NumberOfSpecies
M1_R50_D1	134991	M1	D1	50
M1_R50_D2	269976	M1	D2	50
M1_R50_D3	404971	M1	D3	50
M1_R50_D4	539961	M1	D4	50
M1_R50_D5	674955	M1	D5	50
M1_R150_D1	134992	M1	D1	150
M1_R150_D2	269977	M1	D2	150
M1_R150_D3	404974	M1	D3	150
M1_R150_D4	539963	M1	D4	150
M1_R150_D5	674953	M1	D5	150
M1_R250_D1	134966	M1	D1	250
M1_R250_D2	269925	M1	D2	250
M1_R250_D3	405007	M1	D3	250
M1_R250_D4	539978	M1	D4	250
M1_R250_D5	674944	M1	D5	250
M1_R350_D1	135027	M1	D1	350
M1_R350_D2	269962	M1	D2	350
M1_R350_D3	405006	M1	D3	350
M1_R350_D4	539918	M1	D4	350
M1_R350_D5	674960	M1	D5	350
M1_R450_D1	134985	M1	D1	450
M1_R450_D2	269949	M1	D2	450
M1_R450_D3	404930	M1	D3	450
M1_R450_D4	539902	M1	D4	450
M1_R450_D5	675002	M1	D5	450
M2_R50_D1	134986	M2	D1	50
M2_R50_D2	269972	M2	D2	50
M2_R50_D3	404977	M2	D3	50
M2_R50_D4	539961	M2	D4	50
M2_R50_D5	674949	M2	D5	50
M2_R150_D1	134968	M2	D1	150
M2_R150_D2	269979	M2	D2	150
M2_R150_D3	404955	M2	D3	150
M2_R150_D4	539968	M2	D4	150
M2_R150_D5	674944	M2	D5	150
M2_R250_D1	135017	M2	D1	250
M2_R250_D2	270017	M2	D2	250
M2_R250_D3	404939	M2	D3	250
M2_R250_D4	539942	M2	D4	250
M2_R250_D5	674951	M2	D5	250
M2_R350_D1	134961	M2	D1	350
M2_R350_D2	270018	M2	D2	350
M2_R350_D3	404987	M2	D3	350
M2_R350_D4	539949	M2	D4	350
M2_R350_D5	674897	M2	D5	350
M2_R450_D1	135012	M2	D1	450
M2_R450_D2	270009	M2	D2	450
M2_R450_D3	405007	M2	D3	450
M2_R450_D4	539993	M2	D4	450
M2_R450_D5	675004	M2	D5	450
M3_R50_D1	134992	M3	D1	50
M3_R50_D2	269980	M3	D2	50
M3_R50_D3	404962	M3	D3	50
M3_R50_D4	539956	M3	D4	50
M3_R50_D5	674943	M3	D5	50
M3_R150_D1	135004	M3	D1	150
M3_R150_D2	269998	M3	D2	150
M3_R150_D3	404959	M3	D3	150
M3_R150_D4	539950	M3	D4	150
M3_R150_D5	674956	M3	D5	150
M3_R250_D1	135044	M3	D1	250
M3_R250_D2	269967	M3	D2	250
M3_R250_D3	405008	M3	D3	250
M3_R250_D4	539945	M3	D4	250
M3_R250_D5	674984	M3	D5	250
M3_R350_D1	135045	M3	D1	350
M3_R350_D2	269951	M3	D2	350
M3_R350_D3	404991	M3	D3	350
M3_R350_D4	539903	M3	D4	350
M3_R350_D5	674956	M3	D5	350
M3_R450_D1	135014	M3	D1	450
M3_R450_D2	269988	M3	D2	450
M3_R450_D3	404999	M3	D3	450
M3_R450_D4	539995	M3	D4	450
M3_R450_D5	674993	M3	D5	450
M4_R50_D1	134990	M4	D1	50
M4_R50_D2	269982	M4	D2	50
M4_R50_D3	404969	M4	D3	50
M4_R50_D4	539960	M4	D4	50
M4_R50_D5	674953	M4	D5	50
M4_R150_D1	134972	M4	D1	150
M4_R150_D2	269995	M4	D2	150
M4_R150_D3	404963	M4	D3	150
M4_R150_D4	539941	M4	D4	150
M4_R150_D5	674978	M4	D5	150
M4_R250_D1	135014	M4	D1	250
M4_R250_D2	269932	M4	D2	250
M4_R250_D3	404959	M4	D3	250
M4_R250_D4	539977	M4	D4	250
M4_R250_D5	674993	M4	D5	250
M4_R350_D1	134964	M4	D1	350
M4_R350_D2	270036	M4	D2	350
M4_R350_D3	405019	M4	D3	350
M4_R350_D4	539950	M4	D4	350
M4_R350_D5	674916	M4	D5	350
M4_R450_D1	135008	M4	D1	450
M4_R450_D2	270024	M4	D2	450
M4_R450_D3	405018	M4	D3	450
M4_R450_D4	540007	M4	D4	450
M4_R450_D5	674889	M4	D5	450
M5_R50_D1	134985	M5	D1	50
M5_R50_D2	269978	M5	D2	50
M5_R50_D3	404964	M5	D3	50
M5_R50_D4	539959	M5	D4	50
M5_R50_D5	674945	M5	D5	50
M5_R150_D1	134997	M5	D1	150
M5_R150_D2	269985	M5	D2	150
M5_R150_D3	404989	M5	D3	150
M5_R150_D4	539985	M5	D4	150
M5_R150_D5	674917	M5	D5	150
M5_R250_D1	134970	M5	D1	250
M5_R250_D2	269946	M5	D2	250
M5_R250_D3	404917	M5	D3	250
M5_R250_D4	539997	M5	D4	250
M5_R250_D5	674960	M5	D5	250
M5_R350_D1	135037	M5	D1	350
M5_R350_D2	269950	M5	D2	350
M5_R350_D3	404989	M5	D3	350
M5_R350_D4	539914	M5	D4	350
M5_R350_D5	674946	M5	D5	350
M5_R450_D1	134981	M5	D1	450
M5_R450_D2	269945	M5	D2	450
M5_R450_D3	404904	M5	D3	450
M5_R450_D4	539991	M5	D4	450
M5_R450_D5	674989	M5	D5	450
M6_R50_D1	134982	M6	D1	50
M6_R50_D2	269979	M6	D2	50
M6_R50_D3	404962	M6	D3	50
M6_R50_D4	539955	M6	D4	50
M6_R50_D5	674941	M6	D5	50
M6_R150_D1	134979	M6	D1	150
M6_R150_D2	269958	M6	D2	150
M6_R150_D3	404952	M6	D3	150
M6_R150_D4	539975	M6	D4	150
M6_R150_D5	674955	M6	D5	150
M6_R250_D1	135002	M6	D1	250
M6_R250_D2	269993	M6	D2	250
M6_R250_D3	404992	M6	D3	250
M6_R250_D4	539991	M6	D4	250
M6_R250_D5	674983	M6	D5	250
M6_R350_D1	135031	M6	D1	350
M6_R350_D2	269916	M6	D2	350
M6_R350_D3	404956	M6	D3	350
M6_R350_D4	539965	M6	D4	350
M6_R350_D5	674983	M6	D5	350
M6_R450_D1	135024	M6	D1	450
M6_R450_D2	269968	M6	D2	450
M6_R450_D3	405004	M6	D3	450
M6_R450_D4	539919	M6	D4	450
M6_R450_D5	674947	M6	D5	450
M7_R50_D1	134989	M7	D1	50
M7_R50_D2	269985	M7	D2	50
M7_R50_D3	404974	M7	D3	50
M7_R50_D4	539961	M7	D4	50
M7_R50_D5	674941	M7	D5	50
M7_R150_D1	135012	M7	D1	150
M7_R150_D2	269984	M7	D2	150
M7_R150_D3	404978	M7	D3	150
M7_R150_D4	539950	M7	D4	150
M7_R150_D5	674963	M7	D5	150
M7_R250_D1	134996	M7	D1	250
M7_R250_D2	270006	M7	D2	250
M7_R250_D3	404992	M7	D3	250
M7_R250_D4	539980	M7	D4	250
M7_R250_D5	674993	M7	D5	250
M7_R350_D1	134945	M7	D1	350
M7_R350_D2	269998	M7	D2	350
M7_R350_D3	404944	M7	D3	350
M7_R350_D4	540007	M7	D4	350
M7_R350_D5	674943	M7	D5	350
M7_R450_D1	134988	M7	D1	450
M7_R450_D2	269960	M7	D2	450
M7_R450_D3	404957	M7	D3	450
M7_R450_D4	539980	M7	D4	450
M7_R450_D5	674958	M7	D5	450
M8_R50_D1	134987	M8	D1	50
M8_R50_D2	269971	M8	D2	50
M8_R50_D3	404961	M8	D3	50
M8_R50_D4	539957	M8	D4	50
M8_R50_D5	674949	M8	D5	50
M8_R150_D1	134997	M8	D1	150
M8_R150_D2	269982	M8	D2	150
M8_R150_D3	404971	M8	D3	150
M8_R150_D4	539949	M8	D4	150
M8_R150_D5	674946	M8	D5	150
M8_R250_D1	134934	M8	D1	250
M8_R250_D2	269988	M8	D2	250
M8_R250_D3	404930	M8	D3	250
M8_R250_D4	539982	M8	D4	250
M8_R250_D5	674914	M8	D5	250
M8_R350_D1	134984	M8	D1	350
M8_R350_D2	269987	M8	D2	350
M8_R350_D3	404972	M8	D3	350
M8_R350_D4	539942	M8	D4	350
M8_R350_D5	674942	M8	D5	350
M8_R450_D1	135038	M8	D1	450
M8_R450_D2	269929	M8	D2	450
M8_R450_D3	404971	M8	D3	450
M8_R450_D4	539988	M8	D4	450
M8_R450_D5	674909	M8	D5	450
M9_R50_D1	134989	M9	D1	50
M9_R50_D2	269989	M9	D2	50
M9_R50_D3	404970	M9	D3	50
M9_R50_D4	539956	M9	D4	50
M9_R50_D5	674945	M9	D5	50
M9_R150_D1	135026	M9	D1	150
M9_R150_D2	269975	M9	D2	150
M9_R150_D3	404993	M9	D3	150
M9_R150_D4	539954	M9	D4	150
M9_R150_D5	674971	M9	D5	150
M9_R250_D1	134968	M9	D1	250
M9_R250_D2	269930	M9	D2	250
M9_R250_D3	405006	M9	D3	250
M9_R250_D4	539962	M9	D4	250
M9_R250_D5	674941	M9	D5	250
M9_R350_D1	134995	M9	D1	350
M9_R350_D2	269978	M9	D2	350
M9_R350_D3	404979	M9	D3	350
M9_R350_D4	539965	M9	D4	350
M9_R350_D5	674962	M9	D5	350
M9_R450_D1	135007	M9	D1	450
M9_R450_D2	270031	M9	D2	450
M9_R450_D3	404926	M9	D3	450
M9_R450_D4	539934	M9	D4	450
M9_R450_D5	674949	M9	D5	450
M10_R50_D1	134994	M10	D1	50
M10_R50_D2	269984	M10	D2	50
M10_R50_D3	404959	M10	D3	50
M10_R50_D4	539954	M10	D4	50
M10_R50_D5	674942	M10	D5	50
M10_R150_D1	134990	M10	D1	150
M10_R150_D2	269985	M10	D2	150
M10_R150_D3	404972	M10	D3	150
M10_R150_D4	539947	M10	D4	150
M10_R150_D5	674932	M10	D5	150
M10_R250_D1	134991	M10	D1	250
M10_R250_D2	269983	M10	D2	250
M10_R250_D3	404977	M10	D3	250
M10_R250_D4	539965	M10	D4	250
M10_R250_D5	674970	M10	D5	250
M10_R350_D1	134966	M10	D1	350
M10_R350_D2	269941	M10	D2	350
M10_R350_D3	404912	M10	D3	350
M10_R350_D4	540010	M10	D4	350
M10_R350_D5	674982	M10	D5	350
M10_R450_D1	135046	M10	D1	450
M10_R450_D2	269979	M10	D2	450
M10_R450_D3	405019	M10	D3	450
M10_R450_D4	539930	M10	D4	450
M10_R450_D5	674989	M10	D5	450

## Sheet: TableS2
NCBItaxid	GenomeFile	TaxonName	TaxonStrain	GenomeLength	M1_R50_D1	M1_R50_D2	M1_R50_D3	M1_R50_D4	M1_R50_D5	M1_R150_D1	M1_R150_D2	M1_R150_D3	M1_R150_D4	M1_R150_D5	M1_R250_D1	M1_R250_D2	M1_R250_D3	M1_R250_D4	M1_R250_D5	M1_R350_D1	M1_R350_D2	M1_R350_D3	M1_R350_D4	M1_R350_D5	M1_R450_D1	M1_R450_D2	M1_R450_D3	M1_R450_D4	M1_R450_D5	M2_R50_D1	M2_R50_D2	M2_R50_D3	M2_R50_D4	M2_R50_D5	M2_R150_D1	M2_R150_D2	M2_R150_D3	M2_R150_D4	M2_R150_D5	M2_R250_D1	M2_R250_D2	M2_R250_D3	M2_R250_D4	M2_R250_D5	M2_R350_D1	M2_R350_D2	M2_R350_D3	M2_R350_D4	M2_R350_D5
155864	GCA_000006665.1_ASM666v1_genomic.fna.gz	Escherichia coli O157:H7 str. EDL933	strain=EDL933	5620522	0	0	0	0	0	0	0	0	0	0	3.85694e-05	3.85694e-05	3.85694e-05	3.85694e-05	3.85694e-05	3.39568e-05	3.39568e-05	3.39568e-05	3.39568e-05	3.39568e-05	3.04636e-05	3.04636e-05	3.04636e-05	3.04636e-05	3.04636e-05	0	0	0	0	0	0	0	0	0	0	3.54547e-05	3.54547e-05	3.54547e-05	3.54547e-05	3.54547e-05	3.18117e-05	3.18117e-05	3.18117e-05	3.18117e-05	3.18117e-05
195102	GCA_000009685.1_ASM968v1_genomic.fna.gz	Clostridium perfringens str. 13	strain=13	3085740	0	0	0	0	0	0	0	0	0	0	0.000697791	0.000697791	0.000697791	0.000697791	0.000697791	0.000614342	0.000614342	0.000614342	0.000614342	0.000614342	0.000551143	0.000551143	0.000551143	0.000551143	0.000551143	0	0	0	0	0	0	0	0	0	0	0.000580668	0.000580668	0.000580668	0.000580668	0.000580668	0.000521004	0.000521004	0.000521004	0.000521004	0.000521004
195103	GCA_000013285.1_ASM1328v1_genomic.fna.gz	Clostridium perfringens ATCC 13124	strain=ATCC 13124	3256683	0	0	0	0	0	0	0	0	0	0	0	0	0	0	0	0	0	0	0	0	0.000551143	0.000551143	0.000551143	0.000551143	0.000551143	0	0	0	0	0	0	0	0	0	0	0	0	0	0	0	0	0	0	0	0
198214	GCA_000006925.2_ASM692v2_genomic.fna.gz	Shigella flexneri 2a str. 301	strain=301	4828820	0.000375763	0.000375763	0.000375763	0.000375763	0.000375763	0.000226327	0.000226327	0.000226327	0.000226327	0.000226327	0.000197112	0.000197112	0.000197112	0.000197112	0.000197112	0.000173539	0.000173539	0.000173539	0.000173539	0.000173539	0.000155687	0.000155687	0.000155687	0.000155687	0.000155687	0.000345038	0.000345038	0.000345038	0.000345038	0.000345038	0.000184032	0.000184032	0.000184032	0.000184032	0.000184032	0.000162062	0.000162062	0.000162062	0.000162062	0.000162062	0.00014541	0.00014541	0.00014541	0.00014541	0.00014541
198215	GCA_000007405.1_ASM740v1_genomic.fna.gz	Shigella flexneri 2a str. 2457T	strain=2457T	4599354	0	0	0	0	0	0	0	0	0	0	0	0	0	0	0	0	0	0	0	0	0.000155687	0.000155687	0.000155687	0.000155687	0.000155687	0	0	0	0	0	0	0	0	0	0	0	0	0	0	0	0	0	0	0	0
199310	GCA_000007445.1_ASM744v1_genomic.fna.gz	Escherichia coli CFT073	strain=CFT073	5231428	0	0	0	0	0	0	0	0	0	0	3.85694e-05	3.85694e-05	3.85694e-05	3.85694e-05	3.85694e-05	3.39568e-05	3.39568e-05	3.39568e-05	3.39568e-05	3.39568e-05	3.04636e-05	3.04636e-05	3.04636e-05	3.04636e-05	3.04636e-05	0	0	0	0	0	0	0	0	0	0	3.54547e-05	3.54547e-05	3.54547e-05	3.54547e-05	3.54547e-05	3.18117e-05	3.18117e-05	3.18117e-05	3.18117e-05	3.18117e-05
205913	GCA_000008945.1_ASM894v1_genomic.fna.gz	Bifidobacterium longum DJO10A	strain=DJO10A	2389526	0	0	0	0	0	0.00142207	0.00142207	0.00142207	0.00142207	0.00142207	0.0012385	0.0012385	0.0012385	0.0012385	0.0012385	0.00109039	0.00109039	0.00109039	0.00109039	0.00109039	0.000978221	0.000978221	0.000978221	0.000978221	0.000978221	0	0	0	0	0	0.00226483	0.00226483	0.00226483	0.00226483	0.00226483	0.00199446	0.00199446	0.00199446	0.00199446	0.00199446	0.00178953	0.00178953	0.00178953	0.00178953	0.00178953
206672	GCA_000007525.1_ASM752v1_genomic.fna.gz	Bifidobacterium longum NCC2705	strain=NCC2705	2260266	0	0	0	0	0	0.00142207	0.00142207	0.00142207	0.00142207	0.00142207	0.0012385	0.0012385	0.0012385	0.0012385	0.0012385	0.00109039	0.00109039	0.00109039	0.00109039	0.00109039	0.000978221	0.000978221	0.000978221	0.000978221	0.000978221	0	0	0	0	0	0.00226483	0.00226483	0.00226483	0.00226483	0.00226483	0.00199446	0.00199446	0.00199446	0.00199446	0.00199446	0.00178953	0.00178953	0.00178953	0.00178953	0.00178953
210007	GCA_000007465.2_ASM746v2_genomic.fna.gz	Streptococcus mutans UA159	strain=UA159	2032925	0	0	0	0	0	0	0	0	0	0	0	0	0	0	0	0.00121891	0.00121891	0.00121891	0.00121891	0.00121891	0.00109352	0.00109352	0.00109352	0.00109352	0.00109352	0	0	0	0	0	0	0	0	0	0	0	0	0	0	0	0.00103222	0.00103222	0.00103222	0.00103222	0.00103222
213810	GCA_000210095.1_ASM21009v1_genomic.fna.gz	Ruminococcus champanellensis 18P13 = JCM 17042	strain=type strain: 18P13	2573208	0	0	0	0	0	0	0	0	0	0	0	0	0	0	0	0.0029977	0.0029977	0.0029977	0.0029977	0.0029977	0.00268932	0.00268932	0.00268932	0.00268932	0.00268932	0	0	0	0	0	0	0	0	0	0	0	0	0	0	0	0.00249581	0.00249581	0.00249581	0.00249581	0.00249581
216592	GCA_000027125.1_ASM2712v1_genomic.fna.gz	Escherichia coli 042	strain=042	5355323	0	0	0	0	0	0	0	0	0	0	3.85694e-05	3.85694e-05	3.85694e-05	3.85694e-05	3.85694e-05	3.39568e-05	3.39568e-05	3.39568e-05	3.39568e-05	3.39568e-05	3.04636e-05	3.04636e-05	3.04636e-05	3.04636e-05	3.04636e-05	0	0	0	0	0	0	0	0	0	0	3.54547e-05	3.54547e-05	3.54547e-05	3.54547e-05	3.54547e-05	3.18117e-05	3.18117e-05	3.18117e-05	3.18117e-05	3.18117e-05
216599	GCA_000188795.2_ASM18879v2_genomic.fna.gz	Shigella sonnei 53G	strain=53G	5185984	0	0	0	0	0	0	0	0	0	0	0	0	0	0	0	0.000251816	0.000251816	0.000251816	0.000251816	0.000251816	0.000225911	0.000225911	0.000225911	0.000225911	0.000225911	0	0	0	0	0	0	0	0	0	0	0	0	0	0	0	0.000216579	0.000216579	0.000216579	0.000216579	0.000216579
226186	GCA_000011065.1_ASM1106v1_genomic.fna.gz	Bacteroides thetaiotaomicron VPI-5482	strain=VPI-5482	6293399	0	0	0	0	0	0.0178939	0.0178939	0.0178939	0.0178939	0.0178939	0.0155841	0.0155841	0.0155841	0.0155841	0.0155841	0.0137204	0.0137204	0.0137204	0.0137204	0.0137204	0.0123089	0.0123089	0.0123089	0.0123089	0.0123089	0	0	0	0	0	0.0327088	0.0327088	0.0327088	0.0327088	0.0327088	0.028804	0.028804	0.028804	0.028804	0.028804	0.0258444	0.0258444	0.0258444	0.0258444	0.0258444
245014	GCA_000209895.1_ASM20989v1_genomic.fna.gz	butyrate-producing bacterium SS3/4	strain=SS3/4	3601020	0.012383	0.012383	0.012383	0.012383	0.012383	0.00745844	0.00745844	0.00745844	0.00745844	0.00745844	0.00649566	0.00649566	0.00649566	0.00649566	0.00649566	0.00571885	0.00571885	0.00571885	0.00571885	0.00571885	0.00513054	0.00513054	0.00513054	0.00513054	0.00513054	0.0144625	0.0144625	0.0144625	0.0144625	0.0144625	0.00771383	0.00771383	0.00771383	0.00771383	0.00771383	0.00679295	0.00679295	0.00679295	0.00679295	0.00679295	0.00609498	0.00609498	0.00609498	0.00609498	0.00609498
264199	GCA_000011825.1_ASM1182v1_genomic.fna.gz	Streptococcus thermophilus LMG 18311	strain=LMG 18311	1796846	0	0	0	0	0	0	0	0	0	0	0.00115887	0.00115887	0.00115887	0.00115887	0.00115887	0.00102028	0.00102028	0.00102028	0.00102028	0.00102028	0.000915323	0.000915323	0.000915323	0.000915323	0.000915323	0	0	0	0	0	0	0	0	0	0	0.0010829	0.0010829	0.0010829	0.0010829	0.0010829	0.000971633	0.000971633	0.000971633	0.000971633	0.000971633
272559	GCA_000025985.1_ASM2598v1_genomic.fna.gz	Bacteroides fragilis NCTC 9343	-	5241700	0	0	0	0	0	0	0	0	0	0	0	0	0	0	0	0.000602446	0.000602446	0.000602446	0.000602446	0.000602446	0.000540471	0.000540471	0.000540471	0.000540471	0.000540471	0	0	0	0	0	0	0	0	0	0	0	0	0	0	0	0.00051026	0.00051026	0.00051026	0.00051026	0.00051026
272620	GCA_000016305.1_ASM1630v1_genomic.fna.gz	Klebsiella pneumoniae subsp. pneumoniae MGH 78578	strain=ATCC 700721; MGH 78578	5694894	0.00149715	0.00149715	0.00149715	0.00149715	0.00149715	0.000901755	0.000901755	0.000901755	0.000901755	0.000901755	0.000785352	0.000785352	0.000785352	0.000785352	0.000785352	0.000691431	0.000691431	0.000691431	0.000691431	0.000691431	0.000620302	0.000620302	0.000620302	0.000620302	0.000620302	0.00154613	0.00154613	0.00154613	0.00154613	0.00154613	0.000824654	0.000824654	0.000824654	0.000824654	0.000824654	0.000726206	0.000726206	0.000726206	0.000726206	0.000726206	0.000651589	0.000651589	0.000651589	0.000651589	0.000651589
272621	GCA_000011985.1_ASM1198v1_genomic.fna.gz	Lactobacillus acidophilus NCFM	strain=NCFM	1993560	0	0	0	0	0	0	0	0	0	0	0	0	0	0	0	0	0	0	0	0	0.000986464	0.000986464	0.000986464	0.000986464	0.000986464	0	0	0	0	0	0	0	0	0	0	0	0	0	0	0	0	0	0	0	0
272622	GCA_000014545.1_ASM1454v1_genomic.fna.gz	Lactococcus lactis subsp. cremoris SK11	strain=SK11	2598348	0	0	0	0	0	0	0	0	0	0	0	0	0	0	0	0.000804294	0.000804294	0.000804294	0.000804294	0.000804294	0.000721555	0.000721555	0.000721555	0.000721555	0.000721555	0	0	0	0	0	0	0	0	0	0	0	0	0	0	0	0.000674405	0.000674405	0.000674405	0.000674405	0.000674405
272623	GCA_000006865.1_ASM686v1_genomic.fna.gz	Lactococcus lactis subsp. lactis Il1403	strain=IL1403	2365589	0	0	0	0	0	0	0	0	0	0	0	0	0	0	0	0	0	0	0	0	0.000856136	0.000856136	0.000856136	0.000856136	0.000856136	0	0	0	0	0	0	0	0	0	0	0	0	0	0	0	0	0	0	0	0
289380	GCA_000013845.2_ASM1384v2_genomic.fna.gz	Clostridium perfringens SM101	strain=SM101	2960088	0	0	0	0	0	0	0	0	0	0	0	0	0	0	0	0.000614342	0.000614342	0.000614342	0.000614342	0.000614342	0.000551143	0.000551143	0.000551143	0.000551143	0.000551143	0	0	0	0	0	0	0	0	0	0	0	0	0	0	0	0.000521004	0.000521004	0.000521004	0.000521004	0.000521004
290338	GCA_000018045.1_ASM1804v1_genomic.fna.gz	Citrobacter koseri ATCC BAA-895	strain=ATCC BAA-895	4735357	0	0	0	0	0	0	0	0	0	0	0	0	0	0	0	0.00247666	0.00247666	0.00247666	0.00247666	0.00247666	0.00222188	0.00222188	0.00222188	0.00222188	0.00222188	0	0	0	0	0	0	0	0	0	0	0	0	0	0	0	0.00214399	0.00214399	0.00214399	0.00214399	0.00214399
295405	GCA_000009925.1_ASM992v1_genomic.fna.gz	Bacteroides fragilis YCH46	strain=YCH46	5310990	0	0	0	0	0	0	0	0	0	0	0	0	0	0	0	0.000602446	0.000602446	0.000602446	0.000602446	0.000602446	0.000540471	0.000540471	0.000540471	0.000540471	0.000540471	0	0	0	0	0	0	0	0	0	0	0	0	0	0	0	0.00051026	0.00051026	0.00051026	0.00051026	0.00051026
299768	GCA_000011845.1_ASM1184v1_genomic.fna.gz	Streptococcus thermophilus CNRZ1066	strain=CNRZ1066	1796226	0	0	0	0	0	0.00133064	0.00133064	0.00133064	0.00133064	0.00133064	0.00115887	0.00115887	0.00115887	0.00115887	0.00115887	0.00102028	0.00102028	0.00102028	0.00102028	0.00102028	0.000915323	0.000915323	0.000915323	0.000915323	0.000915323	0	0	0	0	0	0.0012297	0.0012297	0.0012297	0.0012297	0.0012297	0.0010829	0.0010829	0.0010829	0.0010829	0.0010829	0.000971633	0.000971633	0.000971633	0.000971633	0.000971633
300267	GCA_000012005.1_ASM1200v1_genomic.fna.gz	Shigella dysenteriae Sd197	strain=Sd197	4560911	0	0	0	0	0	0	0	0	0	0	0.000286022	0.000286022	0.000286022	0.000286022	0.000286022	0.000251816	0.000251816	0.000251816	0.000251816	0.000251816	0.000225911	0.000225911	0.000225911	0.000225911	0.000225911	0	0	0	0	0	0	0	0	0	0	0.000241381	0.000241381	0.000241381	0.000241381	0.000241381	0.000216579	0.000216579	0.000216579	0.000216579	0.000216579
300268	GCA_000012025.1_ASM1202v1_genomic.fna.gz	Shigella boydii Sb227	strain=Sb227	4646520	0	0	0	0	0	0	0	0	0	0	0	0	0	0	0	0.000900985	0.000900985	0.000900985	0.000900985	0.000900985	0.000808299	0.000808299	0.000808299	0.000808299	0.000808299	0	0	0	0	0	0	0	0	0	0	0	0	0	0	0	0.000753628	0.000753628	0.000753628	0.000753628	0.000753628
300269	GCA_000092525.1_ASM9252v1_genomic.fna.gz	Shigella sonnei Ss046	strain=Ss046	5055316	0	0	0	0	0	0	0	0	0	0	0.000286022	0.000286022	0.000286022	0.000286022	0.000286022	0.000251816	0.000251816	0.000251816	0.000251816	0.000251816	0.000225911	0.000225911	0.000225911	0.000225911	0.000225911	0	0	0	0	0	0	0	0	0	0	0.000241381	0.000241381	0.000241381	0.000241381	0.000241381	0.000216579	0.000216579	0.000216579	0.000216579	0.000216579
316385	GCA_000019425.1_ASM1942v1_genomic.fna.gz	Escherichia coli str. K-12 substr. DH10B	strain=K-12 substr. DH10B	4686137	0	0	0	0	0	0	0	0	0	0	3.85694e-05	3.85694e-05	3.85694e-05	3.85694e-05	3.85694e-05	3.39568e-05	3.39568e-05	3.39568e-05	3.39568e-05	3.39568e-05	3.04636e-05	3.04636e-05	3.04636e-05	3.04636e-05	3.04636e-05	0	0	0	0	0	0	0	0	0	0	3.54547e-05	3.54547e-05	3.54547e-05	3.54547e-05	3.54547e-05	3.18117e-05	3.18117e-05	3.18117e-05	3.18117e-05	3.18117e-05
316401	GCA_000210475.1_ASM21047v1_genomic.fna.gz	Escherichia coli ETEC H10407	strain=ETEC H10407	5325888	0	0	0	0	0	0	0	0	0	0	0	0	0	0	0	3.39568e-05	3.39568e-05	3.39568e-05	3.39568e-05	3.39568e-05	3.04636e-05	3.04636e-05	3.04636e-05	3.04636e-05	3.04636e-05	0	0	0	0	0	0	0	0	0	0	0	0	0	0	0	3.18117e-05	3.18117e-05	3.18117e-05	3.18117e-05	3.18117e-05
316407	GCA_000010245.1_ASM1024v1_genomic.fna.gz	Escherichia coli str. K-12 substr. W3110	strain=K-12 substr. W3110	4646332	7.35266e-05	7.35266e-05	7.35266e-05	7.35266e-05	7.35266e-05	4.4286e-05	4.4286e-05	4.4286e-05	4.4286e-05	4.4286e-05	3.85694e-05	3.85694e-05	3.85694e-05	3.85694e-05	3.85694e-05	3.39568e-05	3.39568e-05	3.39568e-05	3.39568e-05	3.39568e-05	3.04636e-05	3.04636e-05	3.04636e-05	3.04636e-05	3.04636e-05	7.54848e-05	7.54848e-05	7.54848e-05	7.54848e-05	7.54848e-05	4.02611e-05	4.02611e-05	4.02611e-05	4.02611e-05	4.02611e-05	3.54547e-05	3.54547e-05	3.54547e-05	3.54547e-05	3.54547e-05	3.18117e-05	3.18117e-05	3.18117e-05	3.18117e-05	3.18117e-05
321956	GCA_000014405.1_ASM1440v1_genomic.fna.gz	Lactobacillus delbrueckii subsp. bulgaricus ATCC BAA-365	strain=ATCC BAA-365	1856951	0	0	0	0	0	0	0	0	0	0	0	0	0	0	0	0	0	0	0	0	0.000485733	0.000485733	0.000485733	0.000485733	0.000485733	0	0	0	0	0	0	0	0	0	0	0	0	0	0	0	0	0	0	0	0
321967	GCA_000014525.1_ASM1452v1_genomic.fna.gz	Lactobacillus paracasei ATCC 334	strain=ATCC 334	2924325	0	0	0	0	0	0	0	0	0	0	0	0	0	0	0	0	0	0	0	0	0.000879838	0.000879838	0.000879838	0.000879838	0.000879838	0	0	0	0	0	0	0	0	0	0	0	0	0	0	0	0	0	0	0	0
322159	GCA_000014485.1_ASM1448v1_genomic.fna.gz	Streptococcus thermophilus LMD-9	strain=LMD-9	1864178	0.00220921	0.00220921	0.00220921	0.00220921	0.00220921	0.00133064	0.00133064	0.00133064	0.00133064	0.00133064	0.00115887	0.00115887	0.00115887	0.00115887	0.00115887	0.00102028	0.00102028	0.00102028	0.00102028	0.00102028	0.000915323	0.000915323	0.000915323	0.000915323	0.000915323	0.00230555	0.00230555	0.00230555	0.00230555	0.00230555	0.0012297	0.0012297	0.0012297	0.0012297	0.0012297	0.0010829	0.0010829	0.0010829	0.0010829	0.0010829	0.000971633	0.000971633	0.000971633	0.000971633	0.000971633
324831	GCA_000014425.1_ASM1442v1_genomic.fna.gz	Lactobacillus gasseri ATCC 33323 = JCM 1131	strain=ATCC 33323	1894360	0	0	0	0	0	0	0	0	0	0	0	0	0	0	0	0	0	0	0	0	0.000567161	0.000567161	0.000567161	0.000567161	0.000567161	0	0	0	0	0	0	0	0	0	0	0	0	0	0	0	0	0	0	0	0
326426	GCA_000220135.1_ASM22013v1_genomic.fna.gz	Bifidobacterium breve UCC2003	strain=UCC2003	2422684	0	0	0	0	0	0	0	0	0	0	0	0	0	0	0	0	0	0	0	0	0.000703774	0.000703774	0.000703774	0.000703774	0.000703774	0	0	0	0	0	0	0	0	0	0	0	0	0	0	0	0	0	0	0	0
331111	GCA_000017745.1_ASM1774v1_genomic.fna.gz	Escherichia coli O139:H28 str. E24377A	strain=E24377A	5249288	0	0	0	0	0	0	0	0	0	0	3.85694e-05	3.85694e-05	3.85694e-05	3.85694e-05	3.85694e-05	3.39568e-05	3.39568e-05	3.39568e-05	3.39568e-05	3.39568e-05	3.04636e-05	3.04636e-05	3.04636e-05	3.04636e-05	3.04636e-05	0	0	0	0	0	0	0	0	0	0	3.54547e-05	3.54547e-05	3.54547e-05	3.54547e-05	3.54547e-05	3.18117e-05	3.18117e-05	3.18117e-05	3.18117e-05	3.18117e-05
331112	GCA_000017765.1_ASM1776v1_genomic.fna.gz	Escherichia coli HS	strain=HS	4643538	0	0	0	0	0	0	0	0	0	0	3.85694e-05	3.85694e-05	3.85694e-05	3.85694e-05	3.85694e-05	3.39568e-05	3.39568e-05	3.39568e-05	3.39568e-05	3.39568e-05	3.04636e-05	3.04636e-05	3.04636e-05	3.04636e-05	3.04636e-05	0	0	0	0	0	0	0	0	0	0	3.54547e-05	3.54547e-05	3.54547e-05	3.54547e-05	3.54547e-05	3.18117e-05	3.18117e-05	3.18117e-05	3.18117e-05	3.18117e-05
333849	GCA_000166815.1_ASM16681v1_genomic.fna.gz	Enterococcus faecium DO	strain=DO	2848380	0	0	0	0	0	0	0	0	0	0	0	0	0	0	0	0.000244318	0.000244318	0.000244318	0.000244318	0.000244318	0.000219185	0.000219185	0.000219185	0.000219185	0.000219185	0	0	0	0	0	0	0	0	0	0	0	0	0	0	0	0.000222102	0.000222102	0.000222102	0.000222102	0.000222102
334390	GCA_000010145.1_ASM1014v1_genomic.fna.gz	Lactobacillus fermentum IFO 3956	strain=IFO 3956	2098685	0	0	0	0	0	0	0	0	0	0	0	0	0	0	0	0	0	0	0	0	0	0	0	0	0	0	0	0	0	0	0	0	0	0	0	0	0	0	0	0	0	0	0	0	0
339860	GCA_000012545.1_ASM1254v1_genomic.fna.gz	Methanosphaera stadtmanae DSM 3091	strain=DSM 3091	1767403	0	0	0	0	0	0	0	0	0	0	0	0	0	0	0	0	0	0	0	0	0.00194209	0.00194209	0.00194209	0.00194209	0.00194209	0	0	0	0	0	0	0	0	0	0	0	0	0	0	0	0	0	0	0	0
340185	GCA_000167855.1_ASM16785v1_genomic.fna.gz	Escherichia coli E22	strain=E22	5528238	0	0	0	0	0	0	0	0	0	0	3.85694e-05	3.85694e-05	3.85694e-05	3.85694e-05	3.85694e-05	3.39568e-05	3.39568e-05	3.39568e-05	3.39568e-05	3.39568e-05	3.04636e-05	3.04636e-05	3.04636e-05	3.04636e-05	3.04636e-05	0	0	0	0	0	0	0	0	0	0	3.54547e-05	3.54547e-05	3.54547e-05	3.54547e-05	3.54547e-05	3.18117e-05	3.18117e-05	3.18117e-05	3.18117e-05	3.18117e-05
340186	GCA_000167875.1_ASM16787v1_genomic.fna.gz	Escherichia coli E110019	strain=E110019	5376211	0	0	0	0	0	0	0	0	0	0	0	0	0	0	0	3.39568e-05	3.39568e-05	3.39568e-05	3.39568e-05	3.39568e-05	3.04636e-05	3.04636e-05	3.04636e-05	3.04636e-05	3.04636e-05	0	0	0	0	0	0	0	0	0	0	0	0	0	0	0	3.18117e-05	3.18117e-05	3.18117e-05	3.18117e-05	3.18117e-05
344609	GCA_000020185.1_ASM2018v1_genomic.fna.gz	Shigella boydii CDC 3083-94	strain=BS512; CDC 3083-94	4874659	0	0	0	0	0	0	0	0	0	0	0	0	0	0	0	0.000900985	0.000900985	0.000900985	0.000900985	0.000900985	0.000808299	0.000808299	0.000808299	0.000808299	0.000808299	0	0	0	0	0	0	0	0	0	0	0	0	0	0	0	0.000753628	0.000753628	0.000753628	0.000753628	0.000753628
344610	GCA_000167915.2_ASM16791v2_genomic.fna.gz	Escherichia coli 53638	strain=53638	5371790	0	0	0	0	0	4.4286e-05	4.4286e-05	4.4286e-05	4.4286e-05	4.4286e-05	3.85694e-05	3.85694e-05	3.85694e-05	3.85694e-05	3.85694e-05	3.39568e-05	3.39568e-05	3.39568e-05	3.39568e-05	3.39568e-05	3.04636e-05	3.04636e-05	3.04636e-05	3.04636e-05	3.04636e-05	0	0	0	0	0	4.02611e-05	4.02611e-05	4.02611e-05	4.02611e-05	4.02611e-05	3.54547e-05	3.54547e-05	3.54547e-05	3.54547e-05	3.54547e-05	3.18117e-05	3.18117e-05	3.18117e-05	3.18117e-05	3.18117e-05
347253	GCA_000253315.1_ASM25331v1_genomic.fna.gz	Streptococcus salivarius JIM8777	strain=JIM8777	2210574	0	0	0	0	0	0	0	0	0	0	0	0	0	0	0	0.000804329	0.000804329	0.000804329	0.000804329	0.000804329	0.000721586	0.000721586	0.000721586	0.000721586	0.000721586	0	0	0	0	0	0	0	0	0	0	0	0	0	0	0	0.00067571	0.00067571	0.00067571	0.00067571	0.00067571
349741	GCA_000020225.1_ASM2022v1_genomic.fna.gz	Akkermansia muciniphila ATCC BAA-835	strain=ATCC BAA-835	2664102	0	0	0	0	0	0.0125212	0.0125212	0.0125212	0.0125212	0.0125212	0.0109049	0.0109049	0.0109049	0.0109049	0.0109049	0.00960076	0.00960076	0.00960076	0.00960076	0.00960076	0.00861311	0.00861311	0.00861311	0.00861311	0.00861311	0	0	0	0	0	0.0193071	0.0193071	0.0193071	0.0193071	0.0193071	0.0170022	0.0170022	0.0170022	0.0170022	0.0170022	0.0152553	0.0152553	0.0152553	0.0152553	0.0152553
353496	GCA_000191165.1_ASM19116v1_genomic.fna.gz	Lactobacillus delbrueckii subsp. bulgaricus 2038	strain=2038	1872918	0	0	0	0	0	0	0	0	0	0	0	0	0	0	0	0.000541432	0.000541432	0.000541432	0.000541432	0.000541432	0.000485733	0.000485733	0.000485733	0.000485733	0.000485733	0	0	0	0	0	0	0	0	0	0	0	0	0	0	0	0.000458566	0.000458566	0.000458566	0.000458566	0.000458566
358708	GCA_000168075.1_ASM16807v1_genomic.fna.gz	Shigella dysenteriae 1012	strain=1012	5235535	0	0	0	0	0	0	0	0	0	0	0	0	0	0	0	0.000251816	0.000251816	0.000251816	0.000251816	0.000251816	0.000225911	0.000225911	0.000225911	0.000225911	0.000225911	0	0	0	0	0	0	0	0	0	0	0	0	0	0	0	0.000216579	0.000216579	0.000216579	0.000216579	0.000216579
358709	GCA_000168095.1_ASM16809v1_genomic.fna.gz	Escherichia coli 101-1	strain=101-1	4979767	0	0	0	0	0	4.4286e-05	4.4286e-05	4.4286e-05	4.4286e-05	4.4286e-05	3.85694e-05	3.85694e-05	3.85694e-05	3.85694e-05	3.85694e-05	3.39568e-05	3.39568e-05	3.39568e-05	3.39568e-05	3.39568e-05	3.04636e-05	3.04636e-05	3.04636e-05	3.04636e-05	3.04636e-05	0	0	0	0	0	4.02611e-05	4.02611e-05	4.02611e-05	4.02611e-05	4.02611e-05	3.54547e-05	3.54547e-05	3.54547e-05	3.54547e-05	3.54547e-05	3.18117e-05	3.18117e-05	3.18117e-05	3.18117e-05	3.18117e-05
360104	GCA_000017725.2_ASM1772v2_genomic.fna.gz	Campylobacter concisus 13826	strain=13826	2099413	0	0	0	0	0	0	0	0	0	0	0	0	0	0	0	0	0	0	0	0	0.00239347	0.00239347	0.00239347	0.00239347	0.00239347	0	0	0	0	0	0	0	0	0	0	0	0	0	0	0	0	0	0	0	0
360107	GCA_000017585.1_ASM1758v1_genomic.fna.gz	Campylobacter hominis ATCC BAA-381	strain=ATCC BAA-381	1714951	0	0	0	0	0	0	0	0	0	0	0	0	0	0	0	0.00260922	0.00260922	0.00260922	0.00260922	0.00260922	0.00234081	0.00234081	0.00234081	0.00234081	0.00234081	0	0	0	0	0	0	0	0	0	0	0	0	0	0	0	0.0021827	0.0021827	0.0021827	0.0021827	0.0021827
362663	GCA_000013305.1_ASM1330v1_genomic.fna.gz	Escherichia coli 536	strain=536	4938920	0	0	0	0	0	4.4286e-05	4.4286e-05	4.4286e-05	4.4286e-05	4.4286e-05	3.85694e-05	3.85694e-05	3.85694e-05	3.85694e-05	3.85694e-05	3.39568e-05	3.39568e-05	3.39568e-05	3.39568e-05	3.39568e-05	3.04636e-05	3.04636e-05	3.04636e-05	3.04636e-05	3.04636e-05	0	0	0	0	0	4.02611e-05	4.02611e-05	4.02611e-05	4.02611e-05	4.02611e-05	3.54547e-05	3.54547e-05	3.54547e-05	3.54547e-05	3.54547e-05	3.18117e-05	3.18117e-05	3.18117e-05	3.18117e-05	3.18117e-05
362948	GCA_000008925.1_ASM892v1_genomic.fna.gz	Lactobacillus salivarius UCC118	strain=UCC118	2133977	0	0	0	0	0	0	0	0	0	0	0.000933799	0.000933799	0.000933799	0.000933799	0.000933799	0.000822126	0.000822126	0.000822126	0.000822126	0.000822126	0.000737552	0.000737552	0.000737552	0.000737552	0.000737552	0	0	0	0	0	0	0	0	0	0	0.000783965	0.000783965	0.000783965	0.000783965	0.000783965	0.000703413	0.000703413	0.000703413	0.000703413	0.000703413
364106	GCA_000013265.1_ASM1326v1_genomic.fna.gz	Escherichia coli UTI89	strain=UTI89	5179971	0	0	0	0	0	0	0	0	0	0	3.85694e-05	3.85694e-05	3.85694e-05	3.85694e-05	3.85694e-05	3.39568e-05	3.39568e-05	3.39568e-05	3.39568e-05	3.39568e-05	3.04636e-05	3.04636e-05	3.04636e-05	3.04636e-05	3.04636e-05	0	0	0	0	0	0	0	0	0	0	3.54547e-05	3.54547e-05	3.54547e-05	3.54547e-05	3.54547e-05	3.18117e-05	3.18117e-05	3.18117e-05	3.18117e-05	3.18117e-05
367928	GCA_000010425.1_ASM1042v1_genomic.fna.gz	Bifidobacterium adolescentis ATCC 15703	strain=ATCC 15703	2089645	0	0	0	0	0	0	0	0	0	0	0.0023496	0.0023496	0.0023496	0.0023496	0.0023496	0.00206861	0.00206861	0.00206861	0.00206861	0.00206861	0.00185581	0.00185581	0.00185581	0.00185581	0.00185581	0	0	0	0	0	0	0	0	0	0	0.00217389	0.00217389	0.00217389	0.00217389	0.00217389	0.00195053	0.00195053	0.00195053	0.00195053	0.00195053
373384	GCA_000013585.1_ASM1358v1_genomic.fna.gz	Shigella flexneri 5 str. 8401	strain=8401	4574284	0	0	0	0	0	0	0	0	0	0	0	0	0	0	0	0	0	0	0	0	0.000155687	0.000155687	0.000155687	0.000155687	0.000155687	0	0	0	0	0	0	0	0	0	0	0	0	0	0	0	0	0	0	0	0
386585	GCA_000008865.1_ASM886v1_genomic.fna.gz	Escherichia coli O157:H7 str. Sakai	strain=Sakai substr. RIMD 0509952	5594477	0	0	0	0	0	0	0	0	0	0	3.85694e-05	3.85694e-05	3.85694e-05	3.85694e-05	3.85694e-05	3.39568e-05	3.39568e-05	3.39568e-05	3.39568e-05	3.39568e-05	3.04636e-05	3.04636e-05	3.04636e-05	3.04636e-05	3.04636e-05	0	0	0	0	0	0	0	0	0	0	3.54547e-05	3.54547e-05	3.54547e-05	3.54547e-05	3.54547e-05	3.18117e-05	3.18117e-05	3.18117e-05	3.18117e-05	3.18117e-05
388919	GCA_000014205.1_ASM1420v1_genomic.fna.gz	Streptococcus sanguinis SK36	strain=SK36	2388435	0	0	0	0	0	0	0	0	0	0	0	0	0	0	0	0	0	0	0	0	0.00127297	0.00127297	0.00127297	0.00127297	0.00127297	0	0	0	0	0	0	0	0	0	0	0	0	0	0	0	0	0	0	0	0
390333	GCA_000056065.1_ASM5606v1_genomic.fna.gz	Lactobacillus delbrueckii subsp. bulgaricus ATCC 11842 = JCM 1002	strain=ATCC 11842	1864998	0	0	0	0	0	0	0	0	0	0	0	0	0	0	0	0	0	0	0	0	0.000485733	0.000485733	0.000485733	0.000485733	0.000485733	0	0	0	0	0	0	0	0	0	0	0	0	0	0	0	0	0	0	0	0
391904	GCA_000020425.1_ASM2042v1_genomic.fna.gz	Bifidobacterium longum subsp. infantis ATCC 15697 = JCM 1222 = DSM 20088	strain=ATCC 15697	2832748	0.00236102	0.00236102	0.00236102	0.00236102	0.00236102	0.00142207	0.00142207	0.00142207	0.00142207	0.00142207	0.0012385	0.0012385	0.0012385	0.0012385	0.0012385	0.00109039	0.00109039	0.00109039	0.00109039	0.00109039	0.000978221	0.000978221	0.000978221	0.000978221	0.000978221	0.0042463	0.0042463	0.0042463	0.0042463	0.0042463	0.00226483	0.00226483	0.00226483	0.00226483	0.00226483	0.00199446	0.00199446	0.00199446	0.00199446	0.00199446	0.00178953	0.00178953	0.00178953	0.00178953	0.00178953
398513	GCA_000155395.1_ASM15539v1_genomic.fna.gz	Bifidobacterium bifidum NCIMB 41171	strain=NCIMB 41171	2202695	0	0	0	0	0	0	0	0	0	0	0	0	0	0	0	0	0	0	0	0	0.000962254	0.000962254	0.000962254	0.000962254	0.000962254	0	0	0	0	0	0	0	0	0	0	0	0	0	0	0	0	0	0	0	0
401473	GCA_000024445.1_ASM2444v1_genomic.fna.gz	Bifidobacterium dentium Bd1	strain=Bd1	2636367	0	0	0	0	0	0	0	0	0	0	0	0	0	0	0	0	0	0	0	0	0.000591826	0.000591826	0.000591826	0.000591826	0.000591826	0	0	0	0	0	0	0	0	0	0	0	0	0	0	0	0	0	0	0	0
405955	GCA_000014845.1_ASM1484v1_genomic.fna.gz	Escherichia coli APEC O1	strain=APEC O1	5497653	0	0	0	0	0	0	0	0	0	0	3.85694e-05	3.85694e-05	3.85694e-05	3.85694e-05	3.85694e-05	3.39568e-05	3.39568e-05	3.39568e-05	3.39568e-05	3.39568e-05	3.04636e-05	3.04636e-05	3.04636e-05	3.04636e-05	3.04636e-05	0	0	0	0	0	0	0	0	0	0	3.54547e-05	3.54547e-05	3.54547e-05	3.54547e-05	3.54547e-05	3.18117e-05	3.18117e-05	3.18117e-05	3.18117e-05	3.18117e-05
409438	GCA_000010385.1_ASM1038v1_genomic.fna.gz	Escherichia coli SE11	strain=SE11	5155626	0	0	0	0	0	0	0	0	0	0	3.85694e-05	3.85694e-05	3.85694e-05	3.85694e-05	3.85694e-05	3.39568e-05	3.39568e-05	3.39568e-05	3.39568e-05	3.39568e-05	3.04636e-05	3.04636e-05	3.04636e-05	3.04636e-05	3.04636e-05	0	0	0	0	0	0	0	0	0	0	3.54547e-05	3.54547e-05	3.54547e-05	3.54547e-05	3.54547e-05	3.18117e-05	3.18117e-05	3.18117e-05	3.18117e-05	3.18117e-05
411459	GCA_000153905.1_ASM15390v1_genomic.fna.gz	Blautia obeum ATCC 29174	strain=ATCC 29174	3625508	0	0	0	0	0	0.00647367	0.00647367	0.00647367	0.00647367	0.00647367	0.00563802	0.00563802	0.00563802	0.00563802	0.00563802	0.00496377	0.00496377	0.00496377	0.00496377	0.00496377	0.00445313	0.00445313	0.00445313	0.00445313	0.00445313	0	0	0	0	0	0.00678501	0.00678501	0.00678501	0.00678501	0.00678501	0.00597501	0.00597501	0.00597501	0.00597501	0.00597501	0.00536108	0.00536108	0.00536108	0.00536108	0.00536108
411460	GCA_000153925.1_ASM15392v1_genomic.fna.gz	Ruminococcus torques ATCC 27756	strain=ATCC 27756	2741706	0	0	0	0	0	0.0104372	0.0104372	0.0104372	0.0104372	0.0104372	0.00908987	0.00908987	0.00908987	0.00908987	0.00908987	0.00800281	0.00800281	0.00800281	0.00800281	0.00800281	0.00717955	0.00717955	0.00717955	0.00717955	0.00717955	0	0	0	0	0	0.0101058	0.0101058	0.0101058	0.0101058	0.0101058	0.00889937	0.00889937	0.00889937	0.00889937	0.00889937	0.00798496	0.00798496	0.00798496	0.00798496	0.00798496
411461	GCA_000169235.1_ASM16923v1_genomic.fna.gz	Dorea formicigenerans ATCC 27755	strain=ATCC 27755	3186031	0	0	0	0	0	0.00675465	0.00675465	0.00675465	0.00675465	0.00675465	0.00588273	0.00588273	0.00588273	0.00588273	0.00588273	0.00517921	0.00517921	0.00517921	0.00517921	0.00517921	0.00464641	0.00464641	0.00464641	0.00464641	0.00464641	0	0	0	0	0	0.00693076	0.00693076	0.00693076	0.00693076	0.00693076	0.00610336	0.00610336	0.00610336	0.00610336	0.00610336	0.00547624	0.00547624	0.00547624	0.00547624	0.00547624
411462	GCA_000154065.1_ASM15406v1_genomic.fna.gz	Dorea longicatena DSM 13814	strain=DSM 13814	2915433	0	0	0	0	0	0.00882046	0.00882046	0.00882046	0.00882046	0.00882046	0.00768187	0.00768187	0.00768187	0.00768187	0.00768187	0.00676319	0.00676319	0.00676319	0.00676319	0.00676319	0.00606745	0.00606745	0.00606745	0.00606745	0.00606745	0	0	0	0	0	0.00929117	0.00929117	0.00929117	0.00929117	0.00929117	0.00818198	0.00818198	0.00818198	0.00818198	0.00818198	0.00734129	0.00734129	0.00734129	0.00734129	0.00734129
411463	GCA_000153885.1_ASM15388v1_genomic.fna.gz	Eubacterium ventriosum ATCC 27560	strain=ATCC 27560	2870795	0	0	0	0	0	0.00646399	0.00646399	0.00646399	0.00646399	0.00646399	0.00562959	0.00562959	0.00562959	0.00562959	0.00562959	0.00495634	0.00495634	0.00495634	0.00495634	0.00495634	0.00444647	0.00444647	0.00444647	0.00444647	0.00444647	0	0	0	0	0	0.00656028	0.00656028	0.00656028	0.00656028	0.00656028	0.00577711	0.00577711	0.00577711	0.00577711	0.00577711	0.00518351	0.00518351	0.00518351	0.00518351	0.00518351
411464	GCA_000156375.1_ASM15637v1_genomic.fna.gz	Desulfovibrio piger ATCC 29098	strain=ATCC 29098	2867216	0	0	0	0	0	0	0	0	0	0	0	0	0	0	0	0.00337009	0.00337009	0.00337009	0.00337009	0.00337009	0.0030234	0.0030234	0.0030234	0.0030234	0.0030234	0	0	0	0	0	0	0	0	0	0	0	0	0	0	0	0.00286079	0.00286079	0.00286079	0.00286079	0.00286079
411465	GCA_000154405.1_ASM15440v1_genomic.fna.gz	Parvimonas micra ATCC 33270	strain=ATCC 33270	1703872	0	0	0	0	0	0	0	0	0	0	0	0	0	0	0	0	0	0	0	0	0.00169983	0.00169983	0.00169983	0.00169983	0.00169983	0	0	0	0	0	0	0	0	0	0	0	0	0	0	0	0	0	0	0	0
411467	GCA_000169255.2_ASM16925v2_genomic.fna.gz	Pseudoflavonifractor capillosus ATCC 29799	strain=ATCC 29799	4241076	0	0	0	0	0	0.004364	0.004364	0.004364	0.004364	0.004364	0.00380067	0.00380067	0.00380067	0.00380067	0.00380067	0.00334615	0.00334615	0.00334615	0.00334615	0.00334615	0.00300192	0.00300192	0.00300192	0.00300192	0.00300192	0	0	0	0	0	0.00354851	0.00354851	0.00354851	0.00354851	0.00354851	0.00312489	0.00312489	0.00312489	0.00312489	0.00312489	0.00280381	0.00280381	0.00280381	0.00280381	0.00280381
411468	GCA_000154505.1_ASM15450v1_genomic.fna.gz	[Clostridium] scindens ATCC 35704	strain=ATCC 35704	3622605	0	0	0	0	0	0	0	0	0	0	0	0	0	0	0	0	0	0	0	0	0	0	0	0	0	0	0	0	0	0	0	0	0	0	0	0	0	0	0	0	0	0	0	0	0
411469	GCA_000173975.1_ASM17397v1_genomic.fna.gz	[Eubacterium] hallii DSM 3353	strain=DSM 3353	3290996	0	0	0	0	0	0	0	0	0	0	0	0	0	0	0	0	0	0	0	0	0	0	0	0	0	0	0	0	0	0	0	0	0	0	0	0	0	0	0	0	0	0	0	0	0
411470	GCA_000169475.1_ASM16947v1_genomic.fna.gz	Ruminococcus gnavus ATCC 29149	strain=ATCC 29149	3501911	0	0	0	0	0	0	0	0	0	0	0.00662447	0.00662447	0.00662447	0.00662447	0.00662447	0.00583224	0.00583224	0.00583224	0.00583224	0.00583224	0.00523227	0.00523227	0.00523227	0.00523227	0.00523227	0	0	0	0	0	0	0	0	0	0	0.00752443	0.00752443	0.00752443	0.00752443	0.00752443	0.0067513	0.0067513	0.0067513	0.0067513	0.0067513
411474	GCA_000154425.1_ASM15442v1_genomic.fna.gz	Coprococcus eutactus ATCC 27759	strain=ATCC 27759	3102987	0	0	0	0	0	0.00610516	0.00610516	0.00610516	0.00610516	0.00610516	0.00531708	0.00531708	0.00531708	0.00531708	0.00531708	0.00468121	0.00468121	0.00468121	0.00468121	0.00468121	0.00419964	0.00419964	0.00419964	0.00419964	0.00419964	0	0	0	0	0	0.00549107	0.00549107	0.00549107	0.00549107	0.00549107	0.00483554	0.00483554	0.00483554	0.00483554	0.00483554	0.00433869	0.00433869	0.00433869	0.00433869	0.00433869
411476	GCA_000154125.1_ASM15412v1_genomic.fna.gz	Bacteroides ovatus ATCC 8483	strain=ATCC 8483	6465369	0.015648	0.015648	0.015648	0.015648	0.015648	0.00942501	0.00942501	0.00942501	0.00942501	0.00942501	0.00820839	0.00820839	0.00820839	0.00820839	0.00820839	0.00722674	0.00722674	0.00722674	0.00722674	0.00722674	0.00648331	0.00648331	0.00648331	0.00648331	0.00648331	0.0236233	0.0236233	0.0236233	0.0236233	0.0236233	0.0125999	0.0125999	0.0125999	0.0125999	0.0125999	0.0110957	0.0110957	0.0110957	0.0110957	0.0110957	0.00995563	0.00995563	0.00995563	0.00995563	0.00995563
411477	GCA_000154105.1_ASM15410v1_genomic.fna.gz	Parabacteroides merdae ATCC 43184	strain=ATCC 43184	4434377	0	0	0	0	0	0.0130316	0.0130316	0.0130316	0.0130316	0.0130316	0.0113494	0.0113494	0.0113494	0.0113494	0.0113494	0.00999213	0.00999213	0.00999213	0.00999213	0.00999213	0.00896421	0.00896421	0.00896421	0.00896421	0.00896421	0	0	0	0	0	0.0194034	0.0194034	0.0194034	0.0194034	0.0194034	0.017087	0.017087	0.017087	0.017087	0.017087	0.0153313	0.0153313	0.0153313	0.0153313	0.0153313
411479	GCA_000154205.1_ASM15420v1_genomic.fna.gz	Bacteroides uniformis ATCC 8492	strain=ATCC 8492	4719097	0.158544	0.158544	0.158544	0.158544	0.158544	0.0954931	0.0954931	0.0954931	0.0954931	0.0954931	0.0831664	0.0831664	0.0831664	0.0831664	0.0831664	0.0732205	0.0732205	0.0732205	0.0732205	0.0732205	0.0656882	0.0656882	0.0656882	0.0656882	0.0656882	0.0862904	0.0862904	0.0862904	0.0862904	0.0862904	0.0460244	0.0460244	0.0460244	0.0460244	0.0460244	0.04053	0.04053	0.04053	0.04053	0.04053	0.0363655	0.0363655	0.0363655	0.0363655	0.0363655
411481	GCA_000154085.1_ASM15408v1_genomic.fna.gz	Bifidobacterium adolescentis L2-32	strain=L2-32	2389110	0	0	0	0	0	0	0	0	0	0	0	0	0	0	0	0.00206861	0.00206861	0.00206861	0.00206861	0.00206861	0.00185581	0.00185581	0.00185581	0.00185581	0.00185581	0	0	0	0	0	0	0	0	0	0	0	0	0	0	0	0.00195053	0.00195053	0.00195053	0.00195053	0.00195053
411483	GCA_000162015.1_ASM16201v1_genomic.fna.gz	Faecalibacterium prausnitzii A2-165	strain=A2-165	3090349	0.013159	0.013159	0.013159	0.013159	0.013159	0.00792586	0.00792586	0.00792586	0.00792586	0.00792586	0.00690276	0.00690276	0.00690276	0.00690276	0.00690276	0.00607725	0.00607725	0.00607725	0.00607725	0.00607725	0.00545207	0.00545207	0.00545207	0.00545207	0.00545207	0.016288	0.016288	0.016288	0.016288	0.016288	0.00868749	0.00868749	0.00868749	0.00868749	0.00868749	0.00765037	0.00765037	0.00765037	0.00765037	0.00765037	0.0068643	0.0068643	0.0068643	0.0068643	0.0068643
411484	GCA_000154545.1_ASM15454v1_genomic.fna.gz	Clostridium sp. SS2/1	strain=SS2/1	3142181	0	0	0	0	0	0	0	0	0	0	0	0	0	0	0	0	0	0	0	0	0	0	0	0	0	0	0	0	0	0	0	0	0	0	0	0	0	0	0	0	0	0	0	0	0
411485	GCA_000154385.1_ASM15438v1_genomic.fna.gz	Faecalibacterium prausnitzii M21/2	strain=M21/2	3127383	0	0	0	0	0	0	0	0	0	0	0.00327804	0.00327804	0.00327804	0.00327804	0.00327804	0.00288602	0.00288602	0.00288602	0.00288602	0.00288602	0.00258913	0.00258913	0.00258913	0.00258913	0.00258913	0	0	0	0	0	0	0	0	0	0	0.00362671	0.00362671	0.00362671	0.00362671	0.00362671	0.00325406	0.00325406	0.00325406	0.00325406	0.00325406
411486	GCA_000159055.1_ASM15905v1_genomic.fna.gz	Clostridium sp. M62/1	strain=M62/1	3842594	0	0	0	0	0	0	0	0	0	0	0.00337571	0.00337571	0.00337571	0.00337571	0.00337571	0.002972	0.002972	0.002972	0.002972	0.002972	0.00266627	0.00266627	0.00266627	0.00266627	0.00266627	0	0	0	0	0	0	0	0	0	0	0.00276667	0.00276667	0.00276667	0.00276667	0.00276667	0.0024824	0.0024824	0.0024824	0.0024824	0.0024824
411489	GCA_000154245.1_ASM15424v1_genomic.fna.gz	Clostridium sp. L2-50	strain=L2-50	2954616	0	0	0	0	0	0	0	0	0	0	0.00633267	0.00633267	0.00633267	0.00633267	0.00633267	0.00557535	0.00557535	0.00557535	0.00557535	0.00557535	0.0050018	0.0050018	0.0050018	0.0050018	0.0050018	0	0	0	0	0	0	0	0	0	0	0.0067419	0.0067419	0.0067419	0.0067419	0.0067419	0.00604917	0.00604917	0.00604917	0.00604917	0.00604917
411490	GCA_000154305.1_ASM15430v1_genomic.fna.gz	Anaerostipes caccae DSM 14662	strain=DSM 14662	3606936	0	0	0	0	0	0	0	0	0	0	0	0	0	0	0	0	0	0	0	0	0.000196427	0.000196427	0.000196427	0.000196427	0.000196427	0	0	0	0	0	0	0	0	0	0	0	0	0	0	0	0	0	0	0	0
411901	GCA_000169015.1_ASM16901v1_genomic.fna.gz	Bacteroides caccae ATCC 43185	strain=ATCC 43185	4564814	0.0361431	0.0361431	0.0361431	0.0361431	0.0361431	0.0217695	0.0217695	0.0217695	0.0217695	0.0217695	0.0189594	0.0189594	0.0189594	0.0189594	0.0189594	0.016692	0.016692	0.016692	0.016692	0.016692	0.0149749	0.0149749	0.0149749	0.0149749	0.0149749	0.0688212	0.0688212	0.0688212	0.0688212	0.0688212	0.0367069	0.0367069	0.0367069	0.0367069	0.0367069	0.0323248	0.0323248	0.0323248	0.0323248	0.0323248	0.0290035	0.0290035	0.0290035	0.0290035	0.0290035
411902	GCA_000154365.1_ASM15436v1_genomic.fna.gz	[Clostridium] bolteae ATCC BAA-613	strain=ATCC BAA-613	6557988	0	0	0	0	0	0.00959206	0.00959206	0.00959206	0.00959206	0.00959206	0.00835387	0.00835387	0.00835387	0.00835387	0.00835387	0.00735483	0.00735483	0.00735483	0.00735483	0.00735483	0.00659822	0.00659822	0.00659822	0.00659822	0.00659822	0	0	0	0	0	0.00954158	0.00954158	0.00954158	0.00954158	0.00954158	0.0084025	0.0084025	0.0084025	0.0084025	0.0084025	0.00753914	0.00753914	0.00753914	0.00753914	0.00753914
411903	GCA_000169035.1_ASM16903v1_genomic.fna.gz	Collinsella aerofaciens ATCC 25986	strain=ATCC 25986	2439869	0	0	0	0	0	0	0	0	0	0	0	0	0	0	0	0	0	0	0	0	0.00179143	0.00179143	0.00179143	0.00179143	0.00179143	0	0	0	0	0	0	0	0	0	0	0	0	0	0	0	0	0	0	0	0
413997	GCA_000017985.1_ASM1798v1_genomic.fna.gz	Escherichia coli B str. REL606	strain=REL606	4629812	0	0	0	0	0	0	0	0	0	0	3.85694e-05	3.85694e-05	3.85694e-05	3.85694e-05	3.85694e-05	3.39568e-05	3.39568e-05	3.39568e-05	3.39568e-05	3.39568e-05	3.04636e-05	3.04636e-05	3.04636e-05	3.04636e-05	3.04636e-05	0	0	0	0	0	0	0	0	0	0	3.54547e-05	3.54547e-05	3.54547e-05	3.54547e-05	3.54547e-05	3.18117e-05	3.18117e-05	3.18117e-05	3.18117e-05	3.18117e-05
416870	GCA_000009425.1_ASM942v1_genomic.fna.gz	Lactococcus lactis subsp. cremoris MG1363	strain=MG1363	2529478	0	0	0	0	0	0	0	0	0	0	0	0	0	0	0	0.000804294	0.000804294	0.000804294	0.000804294	0.000804294	0.000721555	0.000721555	0.000721555	0.000721555	0.000721555	0	0	0	0	0	0	0	0	0	0	0	0	0	0	0	0.000674405	0.000674405	0.000674405	0.000674405	0.000674405
420247	GCA_000016525.1_ASM1652v1_genomic.fna.gz	Methanobrevibacter smithii ATCC 35061	strain=ATCC 35061; PS; DSMZ 861	1853160	0	0	0	0	0	0	0	0	0	0	0.000946085	0.000946085	0.000946085	0.000946085	0.000946085	0.000832942	0.000832942	0.000832942	0.000832942	0.000832942	0.000747256	0.000747256	0.000747256	0.000747256	0.000747256	0	0	0	0	0	0	0	0	0	0	0.000803988	0.000803988	0.000803988	0.000803988	0.000803988	0.000721379	0.000721379	0.000721379	0.000721379	0.000721379
428125	GCA_000154345.1_ASM15434v1_genomic.fna.gz	[Clostridium] leptum DSM 753	strain=DSM 753	3270209	0	0	0	0	0	0	0	0	0	0	0	0	0	0	0	0.00347759	0.00347759	0.00347759	0.00347759	0.00347759	0.00311984	0.00311984	0.00311984	0.00311984	0.00311984	0	0	0	0	0	0	0	0	0	0	0	0	0	0	0	0.00300861	0.00300861	0.00300861	0.00300861	0.00300861
428126	GCA_000154805.1_ASM15480v1_genomic.fna.gz	[Clostridium] spiroforme DSM 1552	strain=DSM 1552	2507885	0	0	0	0	0	0	0	0	0	0	0	0	0	0	0	0	0	0	0	0	0.00117999	0.00117999	0.00117999	0.00117999	0.00117999	0	0	0	0	0	0	0	0	0	0	0	0	0	0	0	0	0	0	0	0
428127	GCA_000154285.1_ASM15428v1_genomic.fna.gz	Absiella dolichum DSM 3991	strain=DSM 3991	2191053	0	0	0	0	0	0	0	0	0	0	0	0	0	0	0	0.00100179	0.00100179	0.00100179	0.00100179	0.00100179	0.000898733	0.000898733	0.000898733	0.000898733	0.000898733	0	0	0	0	0	0	0	0	0	0	0	0	0	0	0	0.000911309	0.000911309	0.000911309	0.000911309	0.000911309
428128	GCA_000154325.1_ASM15432v1_genomic.fna.gz	[Eubacterium] siraeum DSM 15702	strain=DSM 15702	2697034	0	0	0	0	0	0	0	0	0	0	0	0	0	0	0	0.000945898	0.000945898	0.000945898	0.000945898	0.000945898	0.000848592	0.000848592	0.000848592	0.000848592	0.000848592	0	0	0	0	0	0	0	0	0	0	0	0	0	0	0	0.000777548	0.000777548	0.000777548	0.000777548	0.000777548
431946	GCA_000010485.1_ASM1048v1_genomic.fna.gz	Escherichia coli SE15	strain=SE15	4839683	0	0	0	0	0	0	0	0	0	0	3.85694e-05	3.85694e-05	3.85694e-05	3.85694e-05	3.85694e-05	3.39568e-05	3.39568e-05	3.39568e-05	3.39568e-05	3.39568e-05	3.04636e-05	3.04636e-05	3.04636e-05	3.04636e-05	3.04636e-05	0	0	0	0	0	0	0	0	0	0	3.54547e-05	3.54547e-05	3.54547e-05	3.54547e-05	3.54547e-05	3.18117e-05	3.18117e-05	3.18117e-05	3.18117e-05	3.18117e-05
435590	GCA_000012825.1_ASM1282v1_genomic.fna.gz	Bacteroides vulgatus ATCC 8482	strain=ATCC 8482	5163189	0.0856801	0.0856801	0.0856801	0.0856801	0.0856801	0.0516062	0.0516062	0.0516062	0.0516062	0.0516062	0.0449447	0.0449447	0.0449447	0.0449447	0.0449447	0.0395697	0.0395697	0.0395697	0.0395697	0.0395697	0.0354991	0.0354991	0.0354991	0.0354991	0.0354991	0.0633155	0.0633155	0.0633155	0.0633155	0.0633155	0.0337704	0.0337704	0.0337704	0.0337704	0.0337704	0.0297388	0.0297388	0.0297388	0.0297388	0.0297388	0.0266832	0.0266832	0.0266832	0.0266832	0.0266832
435591	GCA_000012845.1_ASM1284v1_genomic.fna.gz	Parabacteroides distasonis ATCC 8503	strain=ATCC 8503	4811379	0.0220939	0.0220939	0.0220939	0.0220939	0.0220939	0.0133074	0.0133074	0.0133074	0.0133074	0.0133074	0.0115896	0.0115896	0.0115896	0.0115896	0.0115896	0.0102036	0.0102036	0.0102036	0.0102036	0.0102036	0.00915396	0.00915396	0.00915396	0.00915396	0.00915396	0.0364804	0.0364804	0.0364804	0.0364804	0.0364804	0.0194574	0.0194574	0.0194574	0.0194574	0.0194574	0.0171346	0.0171346	0.0171346	0.0171346	0.0171346	0.015374	0.015374	0.015374	0.015374	0.015374
435842	GCA_000187445.1_ASM18744v1_genomic.fna.gz	Streptococcus sp. C150	strain=C150	2142483	0	0	0	0	0	0	0	0	0	0	0	0	0	0	0	0	0	0	0	0	0	0	0	0	0	0	0	0	0	0	0	0	0	0	0	0	0	0	0	0	0	0	0	0	0
439855	GCA_000019645.1_ASM1964v1_genomic.fna.gz	Escherichia coli SMS-3-5	strain=SMS-3-5	5215377	0	0	0	0	0	0	0	0	0	0	3.85694e-05	3.85694e-05	3.85694e-05	3.85694e-05	3.85694e-05	3.39568e-05	3.39568e-05	3.39568e-05	3.39568e-05	3.39568e-05	3.04636e-05	3.04636e-05	3.04636e-05	3.04636e-05	3.04636e-05	0	0	0	0	0	0	0	0	0	0	3.54547e-05	3.54547e-05	3.54547e-05	3.54547e-05	3.54547e-05	3.18117e-05	3.18117e-05	3.18117e-05	3.18117e-05	3.18117e-05
442563	GCA_000021425.1_ASM2142v1_genomic.fna.gz	Bifidobacterium animalis subsp. lactis AD011	strain=AD011	1933695	0	0	0	0	0	0	0	0	0	0	0	0	0	0	0	0.000277727	0.000277727	0.000277727	0.000277727	0.000277727	0.000249157	0.000249157	0.000249157	0.000249157	0.000249157	0	0	0	0	0	0	0	0	0	0	0	0	0	0	0	0.000241917	0.000241917	0.000241917	0.000241917	0.000241917
444447	GCA_000181735.1_ASM18173v1_genomic.fna.gz	Escherichia coli O157:H7 str. EC4206	strain=EC4206	5629932	0	0	0	0	0	0	0	0	0	0	0	0	0	0	0	3.39568e-05	3.39568e-05	3.39568e-05	3.39568e-05	3.39568e-05	3.04636e-05	3.04636e-05	3.04636e-05	3.04636e-05	3.04636e-05	0	0	0	0	0	0	0	0	0	0	0	0	0	0	0	3.18117e-05	3.18117e-05	3.18117e-05	3.18117e-05	3.18117e-05
444448	GCA_000181755.1_ASM18175v1_genomic.fna.gz	Escherichia coli O157:H7 str. EC4045	strain=EC4045	5634850	0	0	0	0	0	0	0	0	0	0	3.85694e-05	3.85694e-05	3.85694e-05	3.85694e-05	3.85694e-05	3.39568e-05	3.39568e-05	3.39568e-05	3.39568e-05	3.39568e-05	3.04636e-05	3.04636e-05	3.04636e-05	3.04636e-05	3.04636e-05	0	0	0	0	0	0	0	0	0	0	3.54547e-05	3.54547e-05	3.54547e-05	3.54547e-05	3.54547e-05	3.18117e-05	3.18117e-05	3.18117e-05	3.18117e-05	3.18117e-05
444449	GCA_000181775.1_ASM18177v1_genomic.fna.gz	Escherichia coli O157:H7 str. EC4042	strain=EC4042	5617728	0	0	0	0	0	0	0	0	0	0	3.85694e-05	3.85694e-05	3.85694e-05	3.85694e-05	3.85694e-05	3.39568e-05	3.39568e-05	3.39568e-05	3.39568e-05	3.39568e-05	3.04636e-05	3.04636e-05	3.04636e-05	3.04636e-05	3.04636e-05	0	0	0	0	0	0	0	0	0	0	3.54547e-05	3.54547e-05	3.54547e-05	3.54547e-05	3.54547e-05	3.18117e-05	3.18117e-05	3.18117e-05	3.18117e-05	3.18117e-05
444450	GCA_000021125.1_ASM2112v1_genomic.fna.gz	Escherichia coli O157:H7 str. EC4115	strain=EC4115	5704171	0	0	0	0	0	4.4286e-05	4.4286e-05	4.4286e-05	4.4286e-05	4.4286e-05	3.85694e-05	3.85694e-05	3.85694e-05	3.85694e-05	3.85694e-05	3.39568e-05	3.39568e-05	3.39568e-05	3.39568e-05	3.39568e-05	3.04636e-05	3.04636e-05	3.04636e-05	3.04636e-05	3.04636e-05	0	0	0	0	0	4.02611e-05	4.02611e-05	4.02611e-05	4.02611e-05	4.02611e-05	3.54547e-05	3.54547e-05	3.54547e-05	3.54547e-05	3.54547e-05	3.18117e-05	3.18117e-05	3.18117e-05	3.18117e-05	3.18117e-05
444451	GCA_000171915.1_ASM17191v1_genomic.fna.gz	Escherichia coli O157:H7 str. EC4196	strain=EC4196	5620606	0	0	0	0	0	0	0	0	0	0	3.85694e-05	3.85694e-05	3.85694e-05	3.85694e-05	3.85694e-05	3.39568e-05	3.39568e-05	3.39568e-05	3.39568e-05	3.39568e-05	3.04636e-05	3.04636e-05	3.04636e-05	3.04636e-05	3.04636e-05	0	0	0	0	0	0	0	0	0	0	3.54547e-05	3.54547e-05	3.54547e-05	3.54547e-05	3.54547e-05	3.18117e-05	3.18117e-05	3.18117e-05	3.18117e-05	3.18117e-05
444453	GCA_000171955.1_ASM17195v1_genomic.fna.gz	Escherichia coli O157:H7 str. EC4076	strain=EC4076	5705645	7.35266e-05	7.35266e-05	7.35266e-05	7.35266e-05	7.35266e-05	4.4286e-05	4.4286e-05	4.4286e-05	4.4286e-05	4.4286e-05	3.85694e-05	3.85694e-05	3.85694e-05	3.85694e-05	3.85694e-05	3.39568e-05	3.39568e-05	3.39568e-05	3.39568e-05	3.39568e-05	3.04636e-05	3.04636e-05	3.04636e-05	3.04636e-05	3.04636e-05	7.54848e-05	7.54848e-05	7.54848e-05	7.54848e-05	7.54848e-05	4.02611e-05	4.02611e-05	4.02611e-05	4.02611e-05	4.02611e-05	3.54547e-05	3.54547e-05	3.54547e-05	3.54547e-05	3.54547e-05	3.18117e-05	3.18117e-05	3.18117e-05	3.18117e-05	3.18117e-05
445970	GCA_000154465.1_ASM15446v1_genomic.fna.gz	Alistipes putredinis DSM 17216	strain=DSM 17216	2550678	0	0	0	0	0	0.014747	0.014747	0.014747	0.014747	0.014747	0.0128434	0.0128434	0.0128434	0.0128434	0.0128434	0.0113075	0.0113075	0.0113075	0.0113075	0.0113075	0.0101442	0.0101442	0.0101442	0.0101442	0.0101442	0	0	0	0	0	0.0224854	0.0224854	0.0224854	0.0224854	0.0224854	0.0198011	0.0198011	0.0198011	0.0198011	0.0198011	0.0177665	0.0177665	0.0177665	0.0177665	0.0177665
445971	GCA_000154825.1_ASM15482v1_genomic.fna.gz	Anaerofustis stercorihominis DSM 17244	strain=DSM 17244	2284703	0	0	0	0	0	0	0	0	0	0	0	0	0	0	0	0	0	0	0	0	0	0	0	0	0	0	0	0	0	0	0	0	0	0	0	0	0	0	0	0	0	0	0	0	0
445972	GCA_000154565.1_ASM15456v1_genomic.fna.gz	Anaerotruncus colihominis DSM 17241	strain=DSM 17241	3719688	0	0	0	0	0	0	0	0	0	0	0	0	0	0	0	0	0	0	0	0	0.00236321	0.00236321	0.00236321	0.00236321	0.00236321	0	0	0	0	0	0	0	0	0	0	0	0	0	0	0	0	0	0	0	0
445973	GCA_000154445.1_ASM15444v1_genomic.fna.gz	Intestinibacter bartlettii DSM 16795	strain=DSM 16795	2972256	0	0	0	0	0	0	0	0	0	0	0	0	0	0	0	0	0	0	0	0	0.00235173	0.00235173	0.00235173	0.00235173	0.00235173	0	0	0	0	0	0	0	0	0	0	0	0	0	0	0	0	0	0	0	0
445974	GCA_000154485.1_ASM15448v1_genomic.fna.gz	Erysipelatoclostridium ramosum DSM 1402	strain=DSM 1402	3235195	0	0	0	0	0	0	0	0	0	0	0	0	0	0	0	0	0	0	0	0	0.00117999	0.00117999	0.00117999	0.00117999	0.00117999	0	0	0	0	0	0	0	0	0	0	0	0	0	0	0	0	0	0	0	0
449673	GCA_000154525.1_ASM15452v1_genomic.fna.gz	Bacteroides stercoris ATCC 43183	strain=ATCC 43183	4009829	0.022643	0.022643	0.022643	0.022643	0.022643	0.0136382	0.0136382	0.0136382	0.0136382	0.0136382	0.0118777	0.0118777	0.0118777	0.0118777	0.0118777	0.0104573	0.0104573	0.0104573	0.0104573	0.0104573	0.00938149	0.00938149	0.00938149	0.00938149	0.00938149	0.0371075	0.0371075	0.0371075	0.0371075	0.0371075	0.0197919	0.0197919	0.0197919	0.0197919	0.0197919	0.0174291	0.0174291	0.0174291	0.0174291	0.0174291	0.0156383	0.0156383	0.0156383	0.0156383	0.0156383
450749	GCA_000163735.1_ASM16373v1_genomic.fna.gz	Veillonella sp. 6_1_27	strain=6_1_27	2174425	0	0	0	0	0	0	0	0	0	0	0	0	0	0	0	0	0	0	0	0	0.000777991	0.000777991	0.000777991	0.000777991	0.000777991	0	0	0	0	0	0	0	0	0	0	0	0	0	0	0	0	0	0	0	0
451756	GCA_000171195.1_ASM17119v1_genomic.fna.gz	Clostridium perfringens CPE str. F4969	strain=F4969	3510272	0	0	0	0	0	0	0	0	0	0	0	0	0	0	0	0.000614342	0.000614342	0.000614342	0.000614342	0.000614342	0.000551143	0.000551143	0.000551143	0.000551143	0.000551143	0	0	0	0	0	0	0	0	0	0	0	0	0	0	0	0.000521004	0.000521004	0.000521004	0.000521004	0.000521004
451757	GCA_000171215.1_ASM17121v1_genomic.fna.gz	Clostridium perfringens NCTC 8239	strain=str. NCTC 8239	3324319	0	0	0	0	0	0	0	0	0	0	0	0	0	0	0	0	0	0	0	0	0.000551143	0.000551143	0.000551143	0.000551143	0.000551143	0	0	0	0	0	0	0	0	0	0	0	0	0	0	0	0	0	0	0	0
457387	GCA_000218365.1_Bacteroides_sp_1_1_30_V1_genomic.fna.gz	Bacteroides sp. 1_1_30	strain=1_1_30	6480532	0	0	0	0	0	0	0	0	0	0	0	0	0	0	0	0	0	0	0	0	0	0	0	0	0	0	0	0	0	0	0	0	0	0	0	0	0	0	0	0	0	0	0	0	0
457388	GCA_000157035.2_Bacteroides_sp_2_1_7_V2_genomic.fna.gz	Parabacteroides sp. 2_1_7	strain=2_1_7	5166302	0	0	0	0	0	0	0	0	0	0	0	0	0	0	0	0.00114383	0.00114383	0.00114383	0.00114383	0.00114383	0.00102616	0.00102616	0.00102616	0.00102616	0.00102616	0	0	0	0	0	0	0	0	0	0	0	0	0	0	0	0.00097919	0.00097919	0.00097919	0.00097919	0.00097919
457390	GCA_000162555.1_ASM16255v1_genomic.fna.gz	Bacteroides sp. 3_1_23	strain=3_1_23	6520178	0	0	0	0	0	0	0	0	0	0	0	0	0	0	0	0	0	0	0	0	0	0	0	0	0	0	0	0	0	0	0	0	0	0	0	0	0	0	0	0	0	0	0	0	0
457391	GCA_000162195.1_ASM16219v1_genomic.fna.gz	Bacteroides sp. 3_1_33FAA	strain=3_1_33FAA	5419714	0	0	0	0	0	0	0	0	0	0	0	0	0	0	0	0	0	0	0	0	0	0	0	0	0	0	0	0	0	0	0	0	0	0	0	0	0	0	0	0	0	0	0	0	0
457392	GCA_000159855.2_Bact_sp_3_2_5_V2_genomic.fna.gz	Bacteroides sp. 3_2_5	strain=3_2_5	5116282	0	0	0	0	0	0.0117786	0.0117786	0.0117786	0.0117786	0.0117786	0.0102581	0.0102581	0.0102581	0.0102581	0.0102581	0.00903136	0.00903136	0.00903136	0.00903136	0.00903136	0.00810228	0.00810228	0.00810228	0.00810228	0.00810228	0	0	0	0	0	0.0146782	0.0146782	0.0146782	0.0146782	0.0146782	0.0129259	0.0129259	0.0129259	0.0129259	0.0129259	0.0115977	0.0115977	0.0115977	0.0115977	0.0115977
457393	GCA_000185585.1_ASM18558v1_genomic.fna.gz	Bacteroides sp. 4_1_36	strain=4_1_36	4638757	0	0	0	0	0	0	0	0	0	0	0	0	0	0	0	0	0	0	0	0	0	0	0	0	0	0	0	0	0	0	0	0	0	0	0	0	0	0	0	0	0	0	0	0	0
457394	GCA_000158515.2_Bacteroides_sp_4_3_47FAA_V2_genomic.fna.gz	Bacteroides sp. 4_3_47FAA	strain=4_3_47FAA	5442925	0	0	0	0	0	0	0	0	0	0	0	0	0	0	0	0	0	0	0	0	0	0	0	0	0	0	0	0	0	0	0	0	0	0	0	0	0	0	0	0	0	0	0	0	0
457395	GCA_000157075.2_Bact_sp_9_1_42FAA_V2_genomic.fna.gz	Bacteroides sp. 9_1_42FAA	strain=9_1_42FAA	5618568	0.0991231	0.0991231	0.0991231	0.0991231	0.0991231	0.0597032	0.0597032	0.0597032	0.0597032	0.0597032	0.0519964	0.0519964	0.0519964	0.0519964	0.0519964	0.0457781	0.0457781	0.0457781	0.0457781	0.0457781	0.0410688	0.0410688	0.0410688	0.0410688	0.0410688	0.0772059	0.0772059	0.0772059	0.0772059	0.0772059	0.041179	0.041179	0.041179	0.041179	0.041179	0.036263	0.036263	0.036263	0.036263	0.036263	0.032537	0.032537	0.032537	0.032537	0.032537
457396	GCA_000158375.2_Clostridium_sp_7_2_43FAA_V2_genomic.fna.gz	Clostridium sp. 7_2_43FAA	strain=7_2_43FAA	3813122	0	0	0	0	0	0	0	0	0	0	0	0	0	0	0	0	0	0	0	0	0	0	0	0	0	0	0	0	0	0	0	0	0	0	0	0	0	0	0	0	0	0	0	0	0
457398	GCA_000145315.2_Desulfovibrio_sp3_1_syn3_V2_genomic.fna.gz	Desulfovibrio sp. 3_1_syn3	strain=3_1_syn3	3663932	0	0	0	0	0	0	0	0	0	0	0	0	0	0	0	0	0	0	0	0	0.00200669	0.00200669	0.00200669	0.00200669	0.00200669	0	0	0	0	0	0	0	0	0	0	0	0	0	0	0	0	0	0	0	0
457400	GCA_000159895.2_Escherichia_sp_1_1_43_V2_genomic.fna.gz	Escherichia sp. 1_1_43	strain=1_1_43	4836424	0	0	0	0	0	0	0	0	0	0	0	0	0	0	0	0	0	0	0	0	0.000770439	0.000770439	0.000770439	0.000770439	0.000770439	0	0	0	0	0	0	0	0	0	0	0	0	0	0	0	0	0	0	0	0
457401	GCA_000158415.2_Escherichia_sp_4_1_40B_V2_genomic.fna.gz	Escherichia sp. 4_1_40B	strain=4_1_40B	4911206	0	0	0	0	0	0.0109196	0.0109196	0.0109196	0.0109196	0.0109196	0.00951004	0.00951004	0.00951004	0.00951004	0.00951004	0.00837273	0.00837273	0.00837273	0.00837273	0.00837273	0.00751141	0.00751141	0.00751141	0.00751141	0.00751141	0	0	0	0	0	0.0112355	0.0112355	0.0112355	0.0112355	0.0112355	0.00989418	0.00989418	0.00989418	0.00989418	0.00989418	0.00887756	0.00887756	0.00887756	0.00887756	0.00887756
457403	GCA_000218655.1_Fusobacterium_sp_11_3_2_V1_genomic.fna.gz	Fusobacterium nucleatum subsp. animalis 11_3_2	strain=11_3_2	2721023	0	0	0	0	0	0	0	0	0	0	0.00087745	0.00087745	0.00087745	0.00087745	0.00087745	0.000772515	0.000772515	0.000772515	0.000772515	0.000772515	0.000693045	0.000693045	0.000693045	0.000693045	0.000693045	0	0	0	0	0	0	0	0	0	0	0.000718229	0.000718229	0.000718229	0.000718229	0.000718229	0.000644431	0.000644431	0.000644431	0.000644431	0.000644431
457405	GCA_000158275.2_ASM15827v2_genomic.fna.gz	Fusobacterium nucleatum subsp. animalis 7_1	strain=7_1	2514029	0	0	0	0	0	0	0	0	0	0	0	0	0	0	0	0.000772515	0.000772515	0.000772515	0.000772515	0.000772515	0.000693045	0.000693045	0.000693045	0.000693045	0.000693045	0	0	0	0	0	0	0	0	0	0	0	0	0	0	0	0.000644431	0.000644431	0.000644431	0.000644431	0.000644431
457412	GCA_000159975.2_Ruminococus_sp_5_1_39B_FAA_V2_genomic.fna.gz	Ruminococcus sp. 5_1_39BFAA	strain=5_1_39BFAA	3930699	0	0	0	0	0	0.0133418	0.0133418	0.0133418	0.0133418	0.0133418	0.0116196	0.0116196	0.0116196	0.0116196	0.0116196	0.01023	0.01023	0.01023	0.01023	0.01023	0.00917761	0.00917761	0.00917761	0.00917761	0.00917761	0	0	0	0	0	0.0197852	0.0197852	0.0197852	0.0197852	0.0197852	0.0174232	0.0174232	0.0174232	0.0174232	0.0174232	0.015633	0.015633	0.015633	0.015633	0.015633
457416	GCA_000163715.1_ASM16371v1_genomic.fna.gz	Veillonella sp. 3_1_44	strain=3_1_44	2163458	0	0	0	0	0	0	0	0	0	0	0	0	0	0	0	0	0	0	0	0	0.000777991	0.000777991	0.000777991	0.000777991	0.000777991	0	0	0	0	0	0	0	0	0	0	0	0	0	0	0	0	0	0	0	0
457421	GCA_000155435.1_ASM15543v1_genomic.fna.gz	Clostridiales bacterium 1_7_47FAA	strain=1_7_47FAA	6548966	0	0	0	0	0	0.0052773	0.0052773	0.0052773	0.0052773	0.0052773	0.00459608	0.00459608	0.00459608	0.00459608	0.00459608	0.00404643	0.00404643	0.00404643	0.00404643	0.00404643	0.00363017	0.00363017	0.00363017	0.00363017	0.00363017	0	0	0	0	0	0.00476023	0.00476023	0.00476023	0.00476023	0.00476023	0.00419195	0.00419195	0.00419195	0.00419195	0.00419195	0.00376123	0.00376123	0.00376123	0.00376123	0.00376123
457424	GCA_000157015.1_ASM15701v1_genomic.fna.gz	Bacteroides fragilis 3_1_12	strain=3_1_12	5530115	0	0	0	0	0	0.000785701	0.000785701	0.000785701	0.000785701	0.000785701	0.000684279	0.000684279	0.000684279	0.000684279	0.000684279	0.000602446	0.000602446	0.000602446	0.000602446	0.000602446	0.000540471	0.000540471	0.000540471	0.000540471	0.000540471	0	0	0	0	0	0.000645788	0.000645788	0.000645788	0.000645788	0.000645788	0.000568693	0.000568693	0.000568693	0.000568693	0.000568693	0.00051026	0.00051026	0.00051026	0.00051026	0.00051026
467705	GCA_000017005.1_ASM1700v1_genomic.fna.gz	Streptococcus gordonii str. Challis substr. CH1	strain=Challis substr. CH1	2196662	0	0	0	0	0	0.00201202	0.00201202	0.00201202	0.00201202	0.00201202	0.0017523	0.0017523	0.0017523	0.0017523	0.0017523	0.00154274	0.00154274	0.00154274	0.00154274	0.00154274	0.00138404	0.00138404	0.00138404	0.00138404	0.00138404	0	0	0	0	0	0.00165422	0.00165422	0.00165422	0.00165422	0.00165422	0.00145674	0.00145674	0.00145674	0.00145674	0.00145674	0.00130706	0.00130706	0.00130706	0.00130706	0.00130706
469008	GCA_000009565.2_ASM956v1_genomic.fna.gz	Escherichia coli BL21(DE3)	strain=BL21(DE3)	4558947	0	0	0	0	0	0	0	0	0	0	0	0	0	0	0	3.39568e-05	3.39568e-05	3.39568e-05	3.39568e-05	3.39568e-05	3.04636e-05	3.04636e-05	3.04636e-05	3.04636e-05	3.04636e-05	0	0	0	0	0	0	0	0	0	0	0	0	0	0	0	3.18117e-05	3.18117e-05	3.18117e-05	3.18117e-05	3.18117e-05
469585	GCA_000162515.1_ASM16251v1_genomic.fna.gz	Bacteroides sp. 1_1_14	strain=1_1_14	6446424	0	0	0	0	0	0	0	0	0	0	0	0	0	0	0	0	0	0	0	0	0	0	0	0	0	0	0	0	0	0	0	0	0	0	0	0	0	0	0	0	0	0	0	0	0
469586	GCA_000159875.2_Bact_sp_1_1_6_V2_genomic.fna.gz	Bacteroides sp. 1_1_6	strain=1_1_6	6760735	0.029295	0.029295	0.029295	0.029295	0.029295	0.0176447	0.0176447	0.0176447	0.0176447	0.0176447	0.0153671	0.0153671	0.0153671	0.0153671	0.0153671	0.0135293	0.0135293	0.0135293	0.0135293	0.0135293	0.0121375	0.0121375	0.0121375	0.0121375	0.0121375	0.0532564	0.0532564	0.0532564	0.0532564	0.0532564	0.0284052	0.0284052	0.0284052	0.0284052	0.0284052	0.0250142	0.0250142	0.0250142	0.0250142	0.0250142	0.022444	0.022444	0.022444	0.022444	0.022444
469587	GCA_000162135.1_ASM16213v1_genomic.fna.gz	Bacteroides sp. 2_1_16	strain=2_1_16	5236303	0	0	0	0	0	0.000785701	0.000785701	0.000785701	0.000785701	0.000785701	0.000684279	0.000684279	0.000684279	0.000684279	0.000684279	0.000602446	0.000602446	0.000602446	0.000602446	0.000602446	0.000540471	0.000540471	0.000540471	0.000540471	0.000540471	0	0	0	0	0	0.000645788	0.000645788	0.000645788	0.000645788	0.000645788	0.000568693	0.000568693	0.000568693	0.000568693	0.000568693	0.00051026	0.00051026	0.00051026	0.00051026	0.00051026
469588	GCA_000162155.1_ASM16215v1_genomic.fna.gz	Bacteroides sp. 2_1_22	strain=2_1_22	6003748	0	0	0	0	0	0	0	0	0	0	0	0	0	0	0	0	0	0	0	0	0	0	0	0	0	0	0	0	0	0	0	0	0	0	0	0	0	0	0	0	0	0	0	0	0
469589	GCA_000162175.1_ASM16217v1_genomic.fna.gz	Bacteroides sp. 2_1_33B	strain=2_1_33B	4927045	0	0	0	0	0	0	0	0	0	0	0	0	0	0	0	0	0	0	0	0	0	0	0	0	0	0	0	0	0	0	0	0	0	0	0	0	0	0	0	0	0	0	0	0	0
469590	GCA_000157055.1_ASM15705v1_genomic.fna.gz	Bacteroides sp. 2_2_4	strain=2_2_4	7101224	0	0	0	0	0	0	0	0	0	0	0	0	0	0	0	0	0	0	0	0	0	0	0	0	0	0	0	0	0	0	0	0	0	0	0	0	0	0	0	0	0	0	0	0	0
469591	GCA_000162535.1_ASM16253v1_genomic.fna.gz	Parabacteroides sp. 20_3	strain=20_3	5749901	0	0	0	0	0	0	0	0	0	0	0	0	0	0	0	0.00114383	0.00114383	0.00114383	0.00114383	0.00114383	0.00102616	0.00102616	0.00102616	0.00102616	0.00102616	0	0	0	0	0	0	0	0	0	0	0	0	0	0	0	0.00097919	0.00097919	0.00097919	0.00097919	0.00097919
469592	GCA_000163655.1_ASM16365v1_genomic.fna.gz	Bacteroides sp. 3_1_19	strain=3_1_19	5250116	0	0	0	0	0	0	0	0	0	0	0	0	0	0	0	0	0	0	0	0	0	0	0	0	0	0	0	0	0	0	0	0	0	0	0	0	0	0	0	0	0	0	0	0	0
469593	GCA_000186105.1_Bacteroides_sp_3_1_40A_V1_genomic.fna.gz	Bacteroides sp. 3_1_40A	strain=3_1_40A	5505782	0	0	0	0	0	0	0	0	0	0	0	0	0	0	0	0	0	0	0	0	0	0	0	0	0	0	0	0	0	0	0	0	0	0	0	0	0	0	0	0	0	0	0	0	0
469594	GCA_000185665.1_ASM18566v1_genomic.fna.gz	Bifidobacterium sp. 12_1_47BFAA	strain=12_1_47BFAA	2405990	0	0	0	0	0	0.00142207	0.00142207	0.00142207	0.00142207	0.00142207	0.0012385	0.0012385	0.0012385	0.0012385	0.0012385	0.00109039	0.00109039	0.00109039	0.00109039	0.00109039	0.000978221	0.000978221	0.000978221	0.000978221	0.000978221	0	0	0	0	0	0.00226483	0.00226483	0.00226483	0.00226483	0.00226483	0.00199446	0.00199446	0.00199446	0.00199446	0.00199446	0.00178953	0.00178953	0.00178953	0.00178953	0.00178953
469595	GCA_000158355.2_Citrobacter_sp_30_2_V2_genomic.fna.gz	Citrobacter sp. 30_2	strain=30_2	5023211	0	0	0	0	0	0	0	0	0	0	0	0	0	0	0	0.0036414	0.0036414	0.0036414	0.0036414	0.0036414	0.00326681	0.00326681	0.00326681	0.00326681	0.00326681	0	0	0	0	0	0	0	0	0	0	0	0	0	0	0	0.00314896	0.00314896	0.00314896	0.00314896	0.00314896
469596	GCA_000186525.1_Coprobacillus_sp_29_1_V1_genomic.fna.gz	Coprobacillus sp. 29_1	strain=29_1	3857363	0	0	0	0	0	0	0	0	0	0	0	0	0	0	0	0	0	0	0	0	0.00200528	0.00200528	0.00200528	0.00200528	0.00200528	0	0	0	0	0	0	0	0	0	0	0	0	0	0	0	0	0	0	0	0
469598	GCA_000157115.2_Escherichia_sp_3_2_53FAA_V2_genomic.fna.gz	Escherichia sp. 3_2_53FAA	strain=3_2_53FAA	5153453	0	0	0	0	0	0	0	0	0	0	3.85694e-05	3.85694e-05	3.85694e-05	3.85694e-05	3.85694e-05	3.39568e-05	3.39568e-05	3.39568e-05	3.39568e-05	3.39568e-05	3.04636e-05	3.04636e-05	3.04636e-05	3.04636e-05	3.04636e-05	0	0	0	0	0	0	0	0	0	0	3.54547e-05	3.54547e-05	3.54547e-05	3.54547e-05	3.54547e-05	3.18117e-05	3.18117e-05	3.18117e-05	3.18117e-05	3.18117e-05
469601	GCA_000218645.2_Fusobacterium_sp_21_1A_V3_genomic.fna.gz	Fusobacterium nucleatum subsp. animalis 21_1A	strain=21_1A	2154007	0	0	0	0	0	0	0	0	0	0	0	0	0	0	0	0.000772515	0.000772515	0.000772515	0.000772515	0.000772515	0.000693045	0.000693045	0.000693045	0.000693045	0.000693045	0	0	0	0	0	0	0	0	0	0	0	0	0	0	0	0.000644431	0.000644431	0.000644431	0.000644431	0.000644431
469603	GCA_000162355.2_Fuso_sp_3_1_33_V2_genomic.fna.gz	Fusobacterium nucleatum subsp. animalis 3_1_33	strain=3_1_33	2302090	0	0	0	0	0	0.0010075	0.0010075	0.0010075	0.0010075	0.0010075	0.00087745	0.00087745	0.00087745	0.00087745	0.00087745	0.000772515	0.000772515	0.000772515	0.000772515	0.000772515	0.000693045	0.000693045	0.000693045	0.000693045	0.000693045	0	0	0	0	0	0.000815596	0.000815596	0.000815596	0.000815596	0.000815596	0.000718229	0.000718229	0.000718229	0.000718229	0.000718229	0.000644431	0.000644431	0.000644431	0.000644431	0.000644431
469608	GCA_000163075.1_ASM16307v1_genomic.fna.gz	Klebsiella sp. 1_1_55	strain=1_1_55	5459739	0	0	0	0	0	0	0	0	0	0	0	0	0	0	0	0.00159924	0.00159924	0.00159924	0.00159924	0.00159924	0.00143473	0.00143473	0.00143473	0.00143473	0.00143473	0	0	0	0	0	0	0	0	0	0	0	0	0	0	0	0.00134696	0.00134696	0.00134696	0.00134696	0.00134696
469609	GCA_000161955.2_Strept_sp_2_1_36FAA_V2_genomic.fna.gz	Streptococcus sp. 2_1_36FAA	strain=2_1_36FAA	2231411	0	0	0	0	0	0	0	0	0	0	0	0	0	0	0	0	0	0	0	0	0	0	0	0	0	0	0	0	0	0	0	0	0	0	0	0	0	0	0	0	0	0	0	0	0
469610	GCA_000144975.1_ASM14497v1_genomic.fna.gz	Burkholderiales bacterium 1_1_47	strain=1_1_47	2655653	0	0	0	0	0	0	0	0	0	0	0	0	0	0	0	0	0	0	0	0	0.00138404	0.00138404	0.00138404	0.00138404	0.00138404	0	0	0	0	0	0	0	0	0	0	0	0	0	0	0	0	0	0	0	0
469613	GCA_000185685.2_Ente_bact_9_2_54FAA_V2_genomic.fna.gz	Enterobacteriaceae bacterium 9_2_54FAA	strain=9_2_54FAA	4497073	0	0	0	0	0	0	0	0	0	0	0	0	0	0	0	0.00331544	0.00331544	0.00331544	0.00331544	0.00331544	0.00297437	0.00297437	0.00297437	0.00297437	0.00297437	0	0	0	0	0	0	0	0	0	0	0	0	0	0	0	0.00276154	0.00276154	0.00276154	0.00276154	0.00276154
469615	GCA_000158835.2_Fuso_gon_ATCC25563_V2_genomic.fna.gz	Fusobacterium gonidiaformans ATCC 25563	strain=ATCC 25563	1698329	0	0	0	0	0	0	0	0	0	0	0	0	0	0	0	0.00212051	0.00212051	0.00212051	0.00212051	0.00212051	0.00190237	0.00190237	0.00190237	0.00190237	0.00190237	0	0	0	0	0	0	0	0	0	0	0	0	0	0	0	0.00187717	0.00187717	0.00187717	0.00187717	0.00187717
469616	GCA_000158195.2_Fuso_mor_ATCC9817_V2_genomic.fna.gz	Fusobacterium mortiferum ATCC 9817	strain=ATCC 9817	2671036	0	0	0	0	0	0	0	0	0	0	0.00318718	0.00318718	0.00318718	0.00318718	0.00318718	0.00280603	0.00280603	0.00280603	0.00280603	0.00280603	0.00251737	0.00251737	0.00251737	0.00251737	0.00251737	0	0	0	0	0	0	0	0	0	0	0.00259594	0.00259594	0.00259594	0.00259594	0.00259594	0.00232921	0.00232921	0.00232921	0.00232921	0.00232921
469617	GCA_000158315.2_Fuso_ulc_ATCC49185_V2_genomic.fna.gz	Fusobacterium ulcerans ATCC 49185	strain=ATCC 49185	3487504	0	0	0	0	0	0.00518529	0.00518529	0.00518529	0.00518529	0.00518529	0.00451595	0.00451595	0.00451595	0.00451595	0.00451595	0.00397588	0.00397588	0.00397588	0.00397588	0.00397588	0.00356688	0.00356688	0.00356688	0.00356688	0.00356688	0	0	0	0	0	0.00452412	0.00452412	0.00452412	0.00452412	0.00452412	0.00398402	0.00398402	0.00398402	0.00398402	0.00398402	0.00357467	0.00357467	0.00357467	0.00357467	0.00357467
469618	GCA_000159915.2_Fuso_varium_ATCC_27725_V2_genomic.fna.gz	Fusobacterium varium ATCC 27725	strain=ATCC 27725	3299801	0	0	0	0	0	0	0	0	0	0	0	0	0	0	0	0.00310621	0.00310621	0.00310621	0.00310621	0.00310621	0.00278666	0.00278666	0.00278666	0.00278666	0.00278666	0	0	0	0	0	0	0	0	0	0	0	0	0	0	0	0.00262727	0.00262727	0.00262727	0.00262727	0.00262727
470145	GCA_000154845.1_ASM15484v1_genomic.fna.gz	Bacteroides coprocola DSM 17136	strain=DSM 17136	4300117	0	0	0	0	0	0.0107297	0.0107297	0.0107297	0.0107297	0.0107297	0.00934463	0.00934463	0.00934463	0.00934463	0.00934463	0.0082271	0.0082271	0.0082271	0.0082271	0.0082271	0.00738076	0.00738076	0.00738076	0.00738076	0.00738076	0	0	0	0	0	0.0103392	0.0103392	0.0103392	0.0103392	0.0103392	0.0091049	0.0091049	0.0091049	0.0091049	0.0091049	0.00816938	0.00816938	0.00816938	0.00816938	0.00816938
470146	GCA_000155875.1_ASM15587v1_genomic.fna.gz	Coprococcus comes ATCC 27758	strain=ATCC 27758	3242215	0.0150619	0.0150619	0.0150619	0.0150619	0.0150619	0.009072	0.009072	0.009072	0.009072	0.009072	0.00790094	0.00790094	0.00790094	0.00790094	0.00790094	0.00695607	0.00695607	0.00695607	0.00695607	0.00695607	0.00624048	0.00624048	0.00624048	0.00624048	0.00624048	0.0176812	0.0176812	0.0176812	0.0176812	0.0176812	0.00943055	0.00943055	0.00943055	0.00943055	0.00943055	0.00830472	0.00830472	0.00830472	0.00830472	0.00830472	0.00745141	0.00745141	0.00745141	0.00745141	0.00745141
471870	GCA_000172175.1_ASM17217v1_genomic.fna.gz	Bacteroides intestinalis DSM 17393	strain=DSM 17393	6052596	0	0	0	0	0	0	0	0	0	0	0.0101481	0.0101481	0.0101481	0.0101481	0.0101481	0.00893446	0.00893446	0.00893446	0.00893446	0.00893446	0.00801535	0.00801535	0.00801535	0.00801535	0.00801535	0	0	0	0	0	0	0	0	0	0	0.0108769	0.0108769	0.0108769	0.0108769	0.0108769	0.0097593	0.0097593	0.0097593	0.0097593	0.0097593
471872	GCA_000154985.1_ASM15498v1_genomic.fna.gz	Streptococcus infantarius subsp. infantarius ATCC BAA-102	strain=ATCC BAA-102	1925187	0	0	0	0	0	0	0	0	0	0	0	0	0	0	0	0	0	0	0	0	0.000261138	0.000261138	0.000261138	0.000261138	0.000261138	0	0	0	0	0	0	0	0	0	0	0	0	0	0	0	0	0	0	0	0
471875	GCA_000155205.1_ASM15520v1_genomic.fna.gz	Ruminococcus lactaris ATCC 29176	strain=ATCC 29176	2731235	0	0	0	0	0	0.00664159	0.00664159	0.00664159	0.00664159	0.00664159	0.00578426	0.00578426	0.00578426	0.00578426	0.00578426	0.00509252	0.00509252	0.00509252	0.00509252	0.00509252	0.00456864	0.00456864	0.00456864	0.00456864	0.00456864	0	0	0	0	0	0.00679386	0.00679386	0.00679386	0.00679386	0.00679386	0.0059828	0.0059828	0.0059828	0.0059828	0.0059828	0.00536807	0.00536807	0.00536807	0.00536807	0.00536807
473819	GCA_000172135.1_ASM17213v1_genomic.fna.gz	Bifidobacterium dentium ATCC 27678	strain=ATCC 27678	2642081	0	0	0	0	0	0	0	0	0	0	0	0	0	0	0	0	0	0	0	0	0.000591826	0.000591826	0.000591826	0.000591826	0.000591826	0	0	0	0	0	0	0	0	0	0	0	0	0	0	0	0	0	0	0	0
476272	GCA_000157975.1_ASM15797v1_genomic.fna.gz	Blautia hydrogenotrophica DSM 10507	strain=DSM 10507	3626943	0	0	0	0	0	0	0	0	0	0	0	0	0	0	0	0	0	0	0	0	0.00102945	0.00102945	0.00102945	0.00102945	0.00102945	0	0	0	0	0	0	0	0	0	0	0	0	0	0	0	0	0	0	0	0
478004	GCA_000171975.1_ASM17197v1_genomic.fna.gz	Escherichia coli O157:H7 str. EC4401	strain=EC4401	5733133	7.35266e-05	7.35266e-05	7.35266e-05	7.35266e-05	7.35266e-05	4.4286e-05	4.4286e-05	4.4286e-05	4.4286e-05	4.4286e-05	3.85694e-05	3.85694e-05	3.85694e-05	3.85694e-05	3.85694e-05	3.39568e-05	3.39568e-05	3.39568e-05	3.39568e-05	3.39568e-05	3.04636e-05	3.04636e-05	3.04636e-05	3.04636e-05	3.04636e-05	7.54848e-05	7.54848e-05	7.54848e-05	7.54848e-05	7.54848e-05	4.02611e-05	4.02611e-05	4.02611e-05	4.02611e-05	4.02611e-05	3.54547e-05	3.54547e-05	3.54547e-05	3.54547e-05	3.54547e-05	3.18117e-05	3.18117e-05	3.18117e-05	3.18117e-05	3.18117e-05
478005	GCA_000171995.1_ASM17199v1_genomic.fna.gz	Escherichia coli O157:H7 str. EC4486	strain=EC4486	5933166	7.35266e-05	7.35266e-05	7.35266e-05	7.35266e-05	7.35266e-05	4.4286e-05	4.4286e-05	4.4286e-05	4.4286e-05	4.4286e-05	3.85694e-05	3.85694e-05	3.85694e-05	3.85694e-05	3.85694e-05	3.39568e-05	3.39568e-05	3.39568e-05	3.39568e-05	3.39568e-05	3.04636e-05	3.04636e-05	3.04636e-05	3.04636e-05	3.04636e-05	7.54848e-05	7.54848e-05	7.54848e-05	7.54848e-05	7.54848e-05	4.02611e-05	4.02611e-05	4.02611e-05	4.02611e-05	4.02611e-05	3.54547e-05	3.54547e-05	3.54547e-05	3.54547e-05	3.54547e-05	3.18117e-05	3.18117e-05	3.18117e-05	3.18117e-05	3.18117e-05
478008	GCA_000172035.1_ASM17203v1_genomic.fna.gz	Escherichia coli O157:H7 str. EC869	strain=EC869	5731065	0	0	0	0	0	0	0	0	0	0	0	0	0	0	0	3.39568e-05	3.39568e-05	3.39568e-05	3.39568e-05	3.39568e-05	3.04636e-05	3.04636e-05	3.04636e-05	3.04636e-05	3.04636e-05	0	0	0	0	0	0	0	0	0	0	0	0	0	0	0	3.18117e-05	3.18117e-05	3.18117e-05	3.18117e-05	3.18117e-05
479436	GCA_000024945.1_ASM2494v1_genomic.fna.gz	Veillonella parvula DSM 2008	strain=DSM 2008	2132142	0	0	0	0	0	0.00198201	0.00198201	0.00198201	0.00198201	0.00198201	0.00172617	0.00172617	0.00172617	0.00172617	0.00172617	0.00151973	0.00151973	0.00151973	0.00151973	0.00151973	0.0013634	0.0013634	0.0013634	0.0013634	0.0013634	0	0	0	0	0	0.00158223	0.00158223	0.00158223	0.00158223	0.00158223	0.00139334	0.00139334	0.00139334	0.00139334	0.00139334	0.00125018	0.00125018	0.00125018	0.00125018	0.00125018
479437	GCA_000024265.1_ASM2426v1_genomic.fna.gz	Eggerthella lenta DSM 2243	strain=DSM 2243	3632260	0	0	0	0	0	0.00633195	0.00633195	0.00633195	0.00633195	0.00633195	0.00551459	0.00551459	0.00551459	0.00551459	0.00551459	0.0048551	0.0048551	0.0048551	0.0048551	0.0048551	0.00435564	0.00435564	0.00435564	0.00435564	0.00435564	0	0	0	0	0	0.00631568	0.00631568	0.00631568	0.00631568	0.00631568	0.00556171	0.00556171	0.00556171	0.00556171	0.00556171	0.00499025	0.00499025	0.00499025	0.00499025	0.00499025
481805	GCA_000019385.1_ASM1938v1_genomic.fna.gz	Escherichia coli ATCC 8739	strain=ATCC 8739	4746218	0	0	0	0	0	0	0	0	0	0	3.85694e-05	3.85694e-05	3.85694e-05	3.85694e-05	3.85694e-05	3.39568e-05	3.39568e-05	3.39568e-05	3.39568e-05	3.39568e-05	3.04636e-05	3.04636e-05	3.04636e-05	3.04636e-05	3.04636e-05	0	0	0	0	0	0	0	0	0	0	3.54547e-05	3.54547e-05	3.54547e-05	3.54547e-05	3.54547e-05	3.18117e-05	3.18117e-05	3.18117e-05	3.18117e-05	3.18117e-05
483214	GCA_000151245.1_ASM15124v1_genomic.fna.gz	Methanobrevibacter smithii DSM 2375	strain=DSM 2375	1713248	0	0	0	0	0	0	0	0	0	0	0	0	0	0	0	0	0	0	0	0	0.000747256	0.000747256	0.000747256	0.000747256	0.000747256	0	0	0	0	0	0	0	0	0	0	0	0	0	0	0	0	0	0	0	0
483215	GCA_000156195.1_ASM15619v1_genomic.fna.gz	Bacteroides finegoldii DSM 17565	strain=DSM 17565	4892401	0	0	0	0	0	0.00749977	0.00749977	0.00749977	0.00749977	0.00749977	0.00653166	0.00653166	0.00653166	0.00653166	0.00653166	0.00575054	0.00575054	0.00575054	0.00575054	0.00575054	0.00515897	0.00515897	0.00515897	0.00515897	0.00515897	0	0	0	0	0	0.00810603	0.00810603	0.00810603	0.00810603	0.00810603	0.00713833	0.00713833	0.00713833	0.00713833	0.00713833	0.00640487	0.00640487	0.00640487	0.00640487	0.00640487
483216	GCA_000155815.1_ASM15581v1_genomic.fna.gz	Bacteroides eggerthii DSM 20697	strain=DSM 20697	4197635	0.00934973	0.00934973	0.00934973	0.00934973	0.00934973	0.00563147	0.00563147	0.00563147	0.00563147	0.00563147	0.00490453	0.00490453	0.00490453	0.00490453	0.00490453	0.004318	0.004318	0.004318	0.004318	0.004318	0.00387379	0.00387379	0.00387379	0.00387379	0.00387379	0.0112525	0.0112525	0.0112525	0.0112525	0.0112525	0.00600169	0.00600169	0.00600169	0.00600169	0.00600169	0.0052852	0.0052852	0.0052852	0.0052852	0.0052852	0.00474215	0.00474215	0.00474215	0.00474215	0.00474215
483217	GCA_000156075.1_ASM15607v1_genomic.fna.gz	Bacteroides dorei DSM 17855	strain=DSM 17855	5566217	0	0	0	0	0	0	0	0	0	0	0	0	0	0	0	0	0	0	0	0	0	0	0	0	0	0	0	0	0	0	0	0	0	0	0	0	0	0	0	0	0	0	0	0	0
483218	GCA_000155855.1_ASM15585v1_genomic.fna.gz	[Bacteroides] pectinophilus ATCC 43243	strain=ATCC 43243	3028326	0	0	0	0	0	0	0	0	0	0	0	0	0	0	0	0	0	0	0	0	0.00171602	0.00171602	0.00171602	0.00171602	0.00171602	0	0	0	0	0	0	0	0	0	0	0	0	0	0	0	0	0	0	0	0
484018	GCA_000187895.1_ASM18789v1_genomic.fna.gz	Bacteroides plebeius DSM 17135	strain=DSM 17135	4421924	0	0	0	0	0	0.00574024	0.00574024	0.00574024	0.00574024	0.00574024	0.00499926	0.00499926	0.00499926	0.00499926	0.00499926	0.0044014	0.0044014	0.0044014	0.0044014	0.0044014	0.00394862	0.00394862	0.00394862	0.00394862	0.00394862	0	0	0	0	0	0.00526168	0.00526168	0.00526168	0.00526168	0.00526168	0.00463354	0.00463354	0.00463354	0.00463354	0.00463354	0.00415744	0.00415744	0.00415744	0.00415744	0.00415744
484021	GCA_000009885.1_ASM988v1_genomic.fna.gz	Klebsiella pneumoniae subsp. pneumoniae NTUH-K2044	strain=NTUH-K2044	5472672	0	0	0	0	0	0.000901755	0.000901755	0.000901755	0.000901755	0.000901755	0.000785352	0.000785352	0.000785352	0.000785352	0.000785352	0.000691431	0.000691431	0.000691431	0.000691431	0.000691431	0.000620302	0.000620302	0.000620302	0.000620302	0.000620302	0	0	0	0	0	0.000824654	0.000824654	0.000824654	0.000824654	0.000824654	0.000726206	0.000726206	0.000726206	0.000726206	0.000726206	0.000651589	0.000651589	0.000651589	0.000651589	0.000651589
486409	GCA_000172535.1_Blac_1.0_genomic.fna.gz	Bifidobacterium animalis subsp. lactis HN019	strain=HN019	1915892	0	0	0	0	0	0	0	0	0	0	0	0	0	0	0	0	0	0	0	0	0.000249157	0.000249157	0.000249157	0.000249157	0.000249157	0	0	0	0	0	0	0	0	0	0	0	0	0	0	0	0	0	0	0	0
491076	GCA_000160515.1_ASM16051v1_genomic.fna.gz	Lactobacillus crispatus JV-V01	strain=JV-V01	2221719	0	0	0	0	0	0	0	0	0	0	0	0	0	0	0	0	0	0	0	0	0	0	0	0	0	0	0	0	0	0	0	0	0	0	0	0	0	0	0	0	0	0	0	0	0
491077	GCA_000159455.2_ASM15945v2_genomic.fna.gz	Lactobacillus reuteri SD2112	strain=SD2112	2316838	0	0	0	0	0	0	0	0	0	0	0	0	0	0	0	0.00296242	0.00296242	0.00296242	0.00296242	0.00296242	0.00265767	0.00265767	0.00265767	0.00265767	0.00265767	0	0	0	0	0	0	0	0	0	0	0	0	0	0	0	0.00244186	0.00244186	0.00244186	0.00244186	0.00244186
500635	GCA_000155955.1_ASM15595v1_genomic.fna.gz	Mitsuokella multacida DSM 20544	strain=DSM 20544	2577056	0	0	0	0	0	0	0	0	0	0	0	0	0	0	0	0	0	0	0	0	0.00194306	0.00194306	0.00194306	0.00194306	0.00194306	0	0	0	0	0	0	0	0	0	0	0	0	0	0	0	0	0	0	0	0
502346	GCA_000155125.1_ASM15512v1_genomic.fna.gz	Escherichia coli O157:H7 str. TW14588	strain=TW14588	5671197	7.35266e-05	7.35266e-05	7.35266e-05	7.35266e-05	7.35266e-05	4.4286e-05	4.4286e-05	4.4286e-05	4.4286e-05	4.4286e-05	3.85694e-05	3.85694e-05	3.85694e-05	3.85694e-05	3.85694e-05	3.39568e-05	3.39568e-05	3.39568e-05	3.39568e-05	3.39568e-05	3.04636e-05	3.04636e-05	3.04636e-05	3.04636e-05	3.04636e-05	7.54848e-05	7.54848e-05	7.54848e-05	7.54848e-05	7.54848e-05	4.02611e-05	4.02611e-05	4.02611e-05	4.02611e-05	4.02611e-05	3.54547e-05	3.54547e-05	3.54547e-05	3.54547e-05	3.54547e-05	3.18117e-05	3.18117e-05	3.18117e-05	3.18117e-05	3.18117e-05
507522	GCA_000019565.1_ASM1956v1_genomic.fna.gz	Klebsiella pneumoniae 342	strain=342	5920257	0	0	0	0	0	0.000901755	0.000901755	0.000901755	0.000901755	0.000901755	0.000785352	0.000785352	0.000785352	0.000785352	0.000785352	0.000691431	0.000691431	0.000691431	0.000691431	0.000691431	0.000620302	0.000620302	0.000620302	0.000620302	0.000620302	0	0	0	0	0	0.000824654	0.000824654	0.000824654	0.000824654	0.000824654	0.000726206	0.000726206	0.000726206	0.000726206	0.000726206	0.000651589	0.000651589	0.000651589	0.000651589	0.000651589
511145	GCA_000005845.2_ASM584v2_genomic.fna.gz	Escherichia coli str. K-12 substr. MG1655	strain=K-12 substr. MG1655	4641652	0	0	0	0	0	0	0	0	0	0	0	0	0	0	0	3.39568e-05	3.39568e-05	3.39568e-05	3.39568e-05	3.39568e-05	3.04636e-05	3.04636e-05	3.04636e-05	3.04636e-05	3.04636e-05	0	0	0	0	0	0	0	0	0	0	0	0	0	0	0	3.18117e-05	3.18117e-05	3.18117e-05	3.18117e-05	3.18117e-05
511680	GCA_000156015.1_ASM15601v1_genomic.fna.gz	Butyrivibrio crossotus DSM 2876	strain=DSM 2876	2496039	0	0	0	0	0	0.00718663	0.00718663	0.00718663	0.00718663	0.00718663	0.00625895	0.00625895	0.00625895	0.00625895	0.00625895	0.00551044	0.00551044	0.00551044	0.00551044	0.00551044	0.00494357	0.00494357	0.00494357	0.00494357	0.00494357	0	0	0	0	0	0.0076104	0.0076104	0.0076104	0.0076104	0.0076104	0.00670186	0.00670186	0.00670186	0.00670186	0.00670186	0.00601325	0.00601325	0.00601325	0.00601325	0.00601325
511691	GCA_000091645.1_ASM9164v1_genomic.fna.gz	Streptococcus mutans NN2025	strain=NN2025	2013587	0	0	0	0	0	0	0	0	0	0	0	0	0	0	0	0.00121891	0.00121891	0.00121891	0.00121891	0.00121891	0.00109352	0.00109352	0.00109352	0.00109352	0.00109352	0	0	0	0	0	0	0	0	0	0	0	0	0	0	0	0.00103222	0.00103222	0.00103222	0.00103222	0.00103222
515619	GCA_000020605.1_ASM2060v1_genomic.fna.gz	[Eubacterium] rectale ATCC 33656	strain=ATCC 33656	3449685	0	0	0	0	0	0	0	0	0	0	0	0	0	0	0	0	0	0	0	0	0.000647012	0.000647012	0.000647012	0.000647012	0.000647012	0	0	0	0	0	0	0	0	0	0	0	0	0	0	0	0	0	0	0	0
515620	GCA_000146185.1_ASM14618v1_genomic.fna.gz	[Eubacterium] eligens ATCC 27750	strain=ATCC 27750	2831389	0	0	0	0	0	0	0	0	0	0	0	0	0	0	0	0.00286518	0.00286518	0.00286518	0.00286518	0.00286518	0.00257043	0.00257043	0.00257043	0.00257043	0.00257043	0	0	0	0	0	0	0	0	0	0	0	0	0	0	0	0.00239742	0.00239742	0.00239742	0.00239742	0.00239742
518634	GCA_000158015.1_ASM15801v1_genomic.fna.gz	Bifidobacterium breve DSM 20213 = JCM 1192	strain=DSM 20213	2331386	0	0	0	0	0	0	0	0	0	0	0	0	0	0	0	0	0	0	0	0	0.000703774	0.000703774	0.000703774	0.000703774	0.000703774	0	0	0	0	0	0	0	0	0	0	0	0	0	0	0	0	0	0	0	0
518635	GCA_000156635.1_ASM15663v1_genomic.fna.gz	Bifidobacterium angulatum DSM 20098 = JCM 7096	strain=DSM 20098	2008208	0	0	0	0	0	0	0	0	0	0	0	0	0	0	0	0	0	0	0	0	0.00216879	0.00216879	0.00216879	0.00216879	0.00216879	0	0	0	0	0	0	0	0	0	0	0	0	0	0	0	0	0	0	0	0
518637	GCA_000156655.1_ASM15665v1_genomic.fna.gz	Holdemanella biformis DSM 3989	strain=DSM 3989	2517763	0	0	0	0	0	0.00746165	0.00746165	0.00746165	0.00746165	0.00746165	0.00649846	0.00649846	0.00649846	0.00649846	0.00649846	0.00572131	0.00572131	0.00572131	0.00572131	0.00572131	0.00513274	0.00513274	0.00513274	0.00513274	0.00513274	0	0	0	0	0	0.00784705	0.00784705	0.00784705	0.00784705	0.00784705	0.00691026	0.00691026	0.00691026	0.00691026	0.00691026	0.00620023	0.00620023	0.00620023	0.00620023	0.00620023
521000	GCA_000158055.1_ASM15805v1_genomic.fna.gz	Providencia rettgeri DSM 1131	strain=DSM 1131	4764068	0	0	0	0	0	0	0	0	0	0	0.00308234	0.00308234	0.00308234	0.00308234	0.00308234	0.00271372	0.00271372	0.00271372	0.00271372	0.00271372	0.00243455	0.00243455	0.00243455	0.00243455	0.00243455	0	0	0	0	0	0	0	0	0	0	0.00256766	0.00256766	0.00256766	0.00256766	0.00256766	0.00230384	0.00230384	0.00230384	0.00230384	0.00230384
521002	GCA_000151225.1_ASM15122v1_genomic.fna.gz	Methanobrevibacter smithii DSM 2374	strain=DSM 2374	1729275	0	0	0	0	0	0	0	0	0	0	0	0	0	0	0	0	0	0	0	0	0.000747256	0.000747256	0.000747256	0.000747256	0.000747256	0	0	0	0	0	0	0	0	0	0	0	0	0	0	0	0	0	0	0	0
521003	GCA_000156175.1_ASM15617v1_genomic.fna.gz	Collinsella intestinalis DSM 13280	strain=DSM 13280	1809497	0	0	0	0	0	0	0	0	0	0	0	0	0	0	0	0	0	0	0	0	0.00211103	0.00211103	0.00211103	0.00211103	0.00211103	0	0	0	0	0	0	0	0	0	0	0	0	0	0	0	0	0	0	0	0
521095	GCA_000024225.1_ASM2422v1_genomic.fna.gz	Atopobium parvulum DSM 20469	strain=DSM 20469	1543805	0	0	0	0	0	0	0	0	0	0	0	0	0	0	0	0	0	0	0	0	0.00266459	0.00266459	0.00266459	0.00266459	0.00266459	0	0	0	0	0	0	0	0	0	0	0	0	0	0	0	0	0	0	0	0
525281	GCA_000159295.1_ASM15929v1_genomic.fna.gz	Escherichia coli 83972	strain=83972	5106156	0	0	0	0	0	0	0	0	0	0	3.85694e-05	3.85694e-05	3.85694e-05	3.85694e-05	3.85694e-05	3.39568e-05	3.39568e-05	3.39568e-05	3.39568e-05	3.39568e-05	3.04636e-05	3.04636e-05	3.04636e-05	3.04636e-05	3.04636e-05	0	0	0	0	0	0	0	0	0	0	3.54547e-05	3.54547e-05	3.54547e-05	3.54547e-05	3.54547e-05	3.18117e-05	3.18117e-05	3.18117e-05	3.18117e-05	3.18117e-05
525306	GCA_000159715.1_ASM15971v1_genomic.fna.gz	Lactobacillus acidophilus ATCC 4796	strain=ATCC 4796	2020500	0	0	0	0	0	0	0	0	0	0	0	0	0	0	0	0.00109958	0.00109958	0.00109958	0.00109958	0.00109958	0.000986464	0.000986464	0.000986464	0.000986464	0.000986464	0	0	0	0	0	0	0	0	0	0	0	0	0	0	0	0.000963917	0.000963917	0.000963917	0.000963917	0.000963917
525325	GCA_000159215.1_ASM15921v1_genomic.fna.gz	Lactobacillus fermentum ATCC 14931	strain=ATCC 14931	1867005	0	0	0	0	0	0	0	0	0	0	0	0	0	0	0	0	0	0	0	0	0	0	0	0	0	0	0	0	0	0	0	0	0	0	0	0	0	0	0	0	0	0	0	0	0
525326	GCA_000143645.1_ASM14364v1_genomic.fna.gz	Lactobacillus gasseri JV-V03	strain=JV-V03	2011855	0	0	0	0	0	0	0	0	0	0	0	0	0	0	0	0	0	0	0	0	0	0	0	0	0	0	0	0	0	0	0	0	0	0	0	0	0	0	0	0	0	0	0	0	0
525330	GCA_000159355.1_ASM15935v1_genomic.fna.gz	Lactobacillus johnsonii ATCC 33200	strain=ATCC 33200	1780499	0	0	0	0	0	0	0	0	0	0	0	0	0	0	0	0.00101633	0.00101633	0.00101633	0.00101633	0.00101633	0.000911774	0.000911774	0.000911774	0.000911774	0.000911774	0	0	0	0	0	0	0	0	0	0	0	0	0	0	0	0.000856023	0.000856023	0.000856023	0.000856023	0.000856023
525337	GCA_000159495.1_ASM15949v1_genomic.fna.gz	Lactobacillus paracasei subsp. paracasei ATCC 25302	strain=ATCC 25302	2991737	0	0	0	0	0	0	0	0	0	0	0	0	0	0	0	0	0	0	0	0	0	0	0	0	0	0	0	0	0	0	0	0	0	0	0	0	0	0	0	0	0	0	0	0	0
525362	GCA_000159375.2_ASM15937v2_genomic.fna.gz	Lactobacillus ruminis ATCC 25644	strain=ATCC 25644	2108740	0	0	0	0	0	0	0	0	0	0	0	0	0	0	0	0.00181789	0.00181789	0.00181789	0.00181789	0.00181789	0.00163088	0.00163088	0.00163088	0.00163088	0.00163088	0	0	0	0	0	0	0	0	0	0	0	0	0	0	0	0.00155355	0.00155355	0.00155355	0.00155355	0.00155355
525369	GCA_000160755.1_ASM16075v1_genomic.fna.gz	Proteus mirabilis ATCC 29906	strain=ATCC 29906	4027100	0	0	0	0	0	0	0	0	0	0	0	0	0	0	0	0.00278085	0.00278085	0.00278085	0.00278085	0.00278085	0.00249477	0.00249477	0.00249477	0.00249477	0.00249477	0	0	0	0	0	0	0	0	0	0	0	0	0	0	0	0.00232337	0.00232337	0.00232337	0.00232337	0.00232337
529507	GCA_000069965.1_ASM6996v1_genomic.fna.gz	Proteus mirabilis HI4320	strain=HI4320	4099895	0	0	0	0	0	0	0	0	0	0	0.00347429	0.00347429	0.00347429	0.00347429	0.00347429	0.0030588	0.0030588	0.0030588	0.0030588	0.0030588	0.00274414	0.00274414	0.00274414	0.00274414	0.00274414	0	0	0	0	0	0	0	0	0	0	0.00286483	0.00286483	0.00286483	0.00286483	0.00286483	0.00257047	0.00257047	0.00257047	0.00257047	0.00257047
529885	GCA_000172615.1_ASM17261v1_genomic.fna.gz	Enterococcus faecium E980	strain=E980	2792626	0	0	0	0	0	0	0	0	0	0	0	0	0	0	0	0	0	0	0	0	0.000219185	0.000219185	0.000219185	0.000219185	0.000219185	0	0	0	0	0	0	0	0	0	0	0	0	0	0	0	0	0	0	0	0
535205	GCA_000172655.1_ASM17265v1_genomic.fna.gz	Enterococcus faecium E1071	strain=E1071	2700770	0	0	0	0	0	0	0	0	0	0	0	0	0	0	0	0	0	0	0	0	0.000219185	0.000219185	0.000219185	0.000219185	0.000219185	0	0	0	0	0	0	0	0	0	0	0	0	0	0	0	0	0	0	0	0
535206	GCA_000172675.1_ASM17267v1_genomic.fna.gz	Enterococcus faecium E1162	strain=E1162	2711396	0	0	0	0	0	0	0	0	0	0	0	0	0	0	0	0	0	0	0	0	0	0	0	0	0	0	0	0	0	0	0	0	0	0	0	0	0	0	0	0	0	0	0	0	0
536056	GCA_000023365.1_ASM2336v1_genomic.fna.gz	Escherichia coli DH1	strain=DH1	4630707	0	0	0	0	0	0	0	0	0	0	0	0	0	0	0	3.39568e-05	3.39568e-05	3.39568e-05	3.39568e-05	3.39568e-05	3.04636e-05	3.04636e-05	3.04636e-05	3.04636e-05	3.04636e-05	0	0	0	0	0	0	0	0	0	0	0	0	0	0	0	3.18117e-05	3.18117e-05	3.18117e-05	3.18117e-05	3.18117e-05
537007	GCA_000156675.1_ASM15667v1_genomic.fna.gz	Blautia hansenii DSM 20583	strain=DSM 20583	3058721	0	0	0	0	0	0	0	0	0	0	0	0	0	0	0	0	0	0	0	0	0.00102945	0.00102945	0.00102945	0.00102945	0.00102945	0	0	0	0	0	0	0	0	0	0	0	0	0	0	0	0	0	0	0	0
537011	GCA_000157935.1_ASM15793v1_genomic.fna.gz	Prevotella copri DSM 18205	strain=DSM 18205	3512473	0.157535	0.157535	0.157535	0.157535	0.157535	0.0948852	0.0948852	0.0948852	0.0948852	0.0948852	0.082637	0.082637	0.082637	0.082637	0.082637	0.0727544	0.0727544	0.0727544	0.0727544	0.0727544	0.06527	0.06527	0.06527	0.06527	0.06527	0.0824048	0.0824048	0.0824048	0.0824048	0.0824048	0.043952	0.043952	0.043952	0.043952	0.043952	0.038705	0.038705	0.038705	0.038705	0.038705	0.034728	0.034728	0.034728	0.034728	0.034728
537013	GCA_000158655.1_ASM15865v1_genomic.fna.gz	[Clostridium] methylpentosum DSM 5476	strain=DSM 5476	3478423	0	0	0	0	0	0	0	0	0	0	0	0	0	0	0	0	0	0	0	0	0.00204864	0.00204864	0.00204864	0.00204864	0.00204864	0	0	0	0	0	0	0	0	0	0	0	0	0	0	0	0	0	0	0	0
537937	GCA_000155415.1_ASM15541v1_genomic.fna.gz	Bifidobacterium longum subsp. infantis CCUG 52486	strain=CCUG 52486	2480850	0.00236102	0.00236102	0.00236102	0.00236102	0.00236102	0.00142207	0.00142207	0.00142207	0.00142207	0.00142207	0.0012385	0.0012385	0.0012385	0.0012385	0.0012385	0.00109039	0.00109039	0.00109039	0.00109039	0.00109039	0.000978221	0.000978221	0.000978221	0.000978221	0.000978221	0.0042463	0.0042463	0.0042463	0.0042463	0.0042463	0.00226483	0.00226483	0.00226483	0.00226483	0.00226483	0.00199446	0.00199446	0.00199446	0.00199446	0.00199446	0.00178953	0.00178953	0.00178953	0.00178953	0.00178953
543734	GCA_000026485.1_ASM2648v1_genomic.fna.gz	Lactobacillus casei BL23	strain=BL23	3079196	0	0	0	0	0	0	0	0	0	0	0	0	0	0	0	0.00298759	0.00298759	0.00298759	0.00298759	0.00298759	0.00268025	0.00268025	0.00268025	0.00268025	0.00268025	0	0	0	0	0	0	0	0	0	0	0	0	0	0	0	0.00248733	0.00248733	0.00248733	0.00248733	0.00248733
544404	GCA_000022225.1_ASM2222v1_genomic.fna.gz	Escherichia coli O157:H7 str. TW14359	strain=TW14359	5622737	0	0	0	0	0	4.4286e-05	4.4286e-05	4.4286e-05	4.4286e-05	4.4286e-05	3.85694e-05	3.85694e-05	3.85694e-05	3.85694e-05	3.85694e-05	3.39568e-05	3.39568e-05	3.39568e-05	3.39568e-05	3.39568e-05	3.04636e-05	3.04636e-05	3.04636e-05	3.04636e-05	3.04636e-05	0	0	0	0	0	4.02611e-05	4.02611e-05	4.02611e-05	4.02611e-05	4.02611e-05	3.54547e-05	3.54547e-05	3.54547e-05	3.54547e-05	3.54547e-05	3.18117e-05	3.18117e-05	3.18117e-05	3.18117e-05	3.18117e-05
544875	GCA_000172835.1_ASM17283v1_genomic.fna.gz	Enterococcus faecium E1636	strain=E1636	2838335	0	0	0	0	0	0	0	0	0	0	0	0	0	0	0	0	0	0	0	0	0	0	0	0	0	0	0	0	0	0	0	0	0	0	0	0	0	0	0	0	0	0	0	0	0
545696	GCA_000157995.1_ASM15799v1_genomic.fna.gz	Holdemania filiformis DSM 12042	strain=DSM 12042	3932923	0	0	0	0	0	0	0	0	0	0	0	0	0	0	0	0	0	0	0	0	0.000898733	0.000898733	0.000898733	0.000898733	0.000898733	0	0	0	0	0	0	0	0	0	0	0	0	0	0	0	0	0	0	0	0
546273	GCA_000160015.1_ASM16001v1_genomic.fna.gz	Veillonella dispar ATCC 17748	strain=ATCC 17748	2118767	0	0	0	0	0	0	0	0	0	0	0	0	0	0	0	0	0	0	0	0	0.000777991	0.000777991	0.000777991	0.000777991	0.000777991	0	0	0	0	0	0	0	0	0	0	0	0	0	0	0	0	0	0	0	0
547042	GCA_000157915.1_ASM15791v1_genomic.fna.gz	Bacteroides coprophilus DSM 18228 = JCM 13818	strain=DSM 18228	4041504	0	0	0	0	0	0	0	0	0	0	0.00439912	0.00439912	0.00439912	0.00439912	0.00439912	0.00387302	0.00387302	0.00387302	0.00387302	0.00387302	0.0034746	0.0034746	0.0034746	0.0034746	0.0034746	0	0	0	0	0	0	0	0	0	0	0.00359796	0.00359796	0.00359796	0.00359796	0.00359796	0.00322827	0.00322827	0.00322827	0.00322827	0.00322827
547043	GCA_000173435.1_ASM17343v1_genomic.fna.gz	Bifidobacterium pseudocatenulatum DSM 20438 = JCM 1200 = LMG 10505	strain=DSM 20438	2304808	0	0	0	0	0	0	0	0	0	0	0	0	0	0	0	0	0	0	0	0	0.00310849	0.00310849	0.00310849	0.00310849	0.00310849	0	0	0	0	0	0	0	0	0	0	0	0	0	0	0	0	0	0	0	0
547468	GCA_000172915.1_ASM17291v1_genomic.fna.gz	Enterococcus faecium U0317	strain=U0317	2893029	0	0	0	0	0	0	0	0	0	0	0	0	0	0	0	0	0	0	0	0	0	0	0	0	0	0	0	0	0	0	0	0	0	0	0	0	0	0	0	0	0	0	0	0	0
548480	GCA_000003135.1_ASM313v1_genomic.fna.gz	Bifidobacterium longum subsp. longum ATCC 55813	strain=ATCC 55813	2396359	0	0	0	0	0	0.00142207	0.00142207	0.00142207	0.00142207	0.00142207	0.0012385	0.0012385	0.0012385	0.0012385	0.0012385	0.00109039	0.00109039	0.00109039	0.00109039	0.00109039	0.000978221	0.000978221	0.000978221	0.000978221	0.000978221	0	0	0	0	0	0.00226483	0.00226483	0.00226483	0.00226483	0.00226483	0.00199446	0.00199446	0.00199446	0.00199446	0.00199446	0.00178953	0.00178953	0.00178953	0.00178953	0.00178953
550672	GCA_000163155.1_ASM16315v1_genomic.fna.gz	Escherichia coli B088	strain=B088	4993477	0	0	0	0	0	4.4286e-05	4.4286e-05	4.4286e-05	4.4286e-05	4.4286e-05	3.85694e-05	3.85694e-05	3.85694e-05	3.85694e-05	3.85694e-05	3.39568e-05	3.39568e-05	3.39568e-05	3.39568e-05	3.39568e-05	3.04636e-05	3.04636e-05	3.04636e-05	3.04636e-05	3.04636e-05	0	0	0	0	0	4.02611e-05	4.02611e-05	4.02611e-05	4.02611e-05	4.02611e-05	3.54547e-05	3.54547e-05	3.54547e-05	3.54547e-05	3.54547e-05	3.18117e-05	3.18117e-05	3.18117e-05	3.18117e-05	3.18117e-05
550676	GCA_000163175.1_ASM16317v1_genomic.fna.gz	Escherichia coli B185	strain=B185	5144306	0	0	0	0	0	0	0	0	0	0	3.85694e-05	3.85694e-05	3.85694e-05	3.85694e-05	3.85694e-05	3.39568e-05	3.39568e-05	3.39568e-05	3.39568e-05	3.39568e-05	3.04636e-05	3.04636e-05	3.04636e-05	3.04636e-05	3.04636e-05	0	0	0	0	0	0	0	0	0	0	3.54547e-05	3.54547e-05	3.54547e-05	3.54547e-05	3.54547e-05	3.18117e-05	3.18117e-05	3.18117e-05	3.18117e-05	3.18117e-05
550677	GCA_000163195.1_ASM16319v1_genomic.fna.gz	Escherichia coli B354	strain=B354	4853778	0	0	0	0	0	0	0	0	0	0	0	0	0	0	0	3.39568e-05	3.39568e-05	3.39568e-05	3.39568e-05	3.39568e-05	3.04636e-05	3.04636e-05	3.04636e-05	3.04636e-05	3.04636e-05	0	0	0	0	0	0	0	0	0	0	0	0	0	0	0	3.18117e-05	3.18117e-05	3.18117e-05	3.18117e-05	3.18117e-05
550687	GCA_000190835.1_ASM19083v1_genomic.fna.gz	Escherichia coli E482	strain=E482	4857516	0	0	0	0	0	0	0	0	0	0	3.85694e-05	3.85694e-05	3.85694e-05	3.85694e-05	3.85694e-05	3.39568e-05	3.39568e-05	3.39568e-05	3.39568e-05	3.39568e-05	3.04636e-05	3.04636e-05	3.04636e-05	3.04636e-05	3.04636e-05	0	0	0	0	0	0	0	0	0	0	3.54547e-05	3.54547e-05	3.54547e-05	3.54547e-05	3.54547e-05	3.18117e-05	3.18117e-05	3.18117e-05	3.18117e-05	3.18117e-05
550694	GCA_000190495.1_ASM19049v1_genomic.fna.gz	Escherichia fergusonii B253	strain=B253	4775957	0	0	0	0	0	0	0	0	0	0	0	0	0	0	0	0	0	0	0	0	0.000770439	0.000770439	0.000770439	0.000770439	0.000770439	0	0	0	0	0	0	0	0	0	0	0	0	0	0	0	0	0	0	0	0
552396	GCA_000163515.2_Ery_bact_5_2_54FAA_V2_genomic.fna.gz	Erysipelotrichaceae bacterium 5_2_54FAA	strain=5_2_54FAA	3137498	0	0	0	0	0	0	0	0	0	0	0	0	0	0	0	0	0	0	0	0	0	0	0	0	0	0	0	0	0	0	0	0	0	0	0	0	0	0	0	0	0	0	0	0	0
552398	GCA_000177015.3_Rumi_bact_D16_V2_genomic.fna.gz	Ruminococcaceae bacterium D16	strain=D16	3197355	0	0	0	0	0	0	0	0	0	0	0	0	0	0	0	0.00368206	0.00368206	0.00368206	0.00368206	0.00368206	0.00330327	0.00330327	0.00330327	0.00330327	0.00330327	0	0	0	0	0	0	0	0	0	0	0	0	0	0	0	0.00321301	0.00321301	0.00321301	0.00321301	0.00321301
552531	GCA_000025245.1_ASM2524v1_genomic.fna.gz	Bifidobacterium animalis subsp. lactis BB-12	strain=BB-12	1942198	0	0	0	0	0	0	0	0	0	0	0	0	0	0	0	0	0	0	0	0	0.000249157	0.000249157	0.000249157	0.000249157	0.000249157	0	0	0	0	0	0	0	0	0	0	0	0	0	0	0	0	0	0	0	0
553171	GCA_000177315.1_ASM17731v1_genomic.fna.gz	Prevotella bivia JCVIHMP010	strain=JCVIHMP010	2424432	0	0	0	0	0	0	0	0	0	0	0	0	0	0	0	0	0	0	0	0	0	0	0	0	0	0	0	0	0	0	0	0	0	0	0	0	0	0	0	0	0	0	0	0	0
553191	GCA_000149165.2_ASM14916v1_genomic.fna.gz	Bifidobacterium dentium JCVIHMP022	strain=JCVIHMP022	2636584	0	0	0	0	0	0	0	0	0	0	0	0	0	0	0	0	0	0	0	0	0.000591826	0.000591826	0.000591826	0.000591826	0.000591826	0	0	0	0	0	0	0	0	0	0	0	0	0	0	0	0	0	0	0	0
553973	GCA_000156515.1_ASM15651v1_genomic.fna.gz	[Clostridium] hylemonae DSM 15053	strain=DSM 15053	3889859	0	0	0	0	0	0	0	0	0	0	0	0	0	0	0	0	0	0	0	0	0.00181991	0.00181991	0.00181991	0.00181991	0.00181991	0	0	0	0	0	0	0	0	0	0	0	0	0	0	0	0	0	0	0	0
555970	GCA_000022965.1_ASM2296v1_genomic.fna.gz	Bifidobacterium animalis subsp. lactis DSM 10140	strain=DSM 10140	1938483	0	0	0	0	0	0	0	0	0	0	0	0	0	0	0	0	0	0	0	0	0.000249157	0.000249157	0.000249157	0.000249157	0.000249157	0	0	0	0	0	0	0	0	0	0	0	0	0	0	0	0	0	0	0	0
556258	GCA_000157095.2_Bacteroides_sp_D1_V2_genomic.fna.gz	Bacteroides sp. D1	strain=D1	5974559	0	0	0	0	0	0	0	0	0	0	0	0	0	0	0	0	0	0	0	0	0	0	0	0	0	0	0	0	0	0	0	0	0	0	0	0	0	0	0	0	0	0	0	0	0
556259	GCA_000159075.2_Bact_sp_D2_V2_genomic.fna.gz	Bacteroides sp. D2	strain=D2	6920457	0	0	0	0	0	0	0	0	0	0	0	0	0	0	0	0.00215067	0.00215067	0.00215067	0.00215067	0.00215067	0.00192943	0.00192943	0.00192943	0.00192943	0.00192943	0	0	0	0	0	0	0	0	0	0	0	0	0	0	0	0.00189707	0.00189707	0.00189707	0.00189707	0.00189707
556260	GCA_000158335.2_Bact_dorei_5_1_36_D4_V2_genomic.fna.gz	Bacteroides dorei 5_1_36/D4	strain=5_1_36/D4	5538248	0	0	0	0	0	0	0	0	0	0	0	0	0	0	0	0	0	0	0	0	0.000935371	0.000935371	0.000935371	0.000935371	0.000935371	0	0	0	0	0	0	0	0	0	0	0	0	0	0	0	0	0	0	0	0
556261	GCA_000190355.1_ASM19035v1_genomic.fna.gz	Clostridium sp. D5	strain=D5	5427315	0	0	0	0	0	0	0	0	0	0	0	0	0	0	0	0.00209132	0.00209132	0.00209132	0.00209132	0.00209132	0.00187618	0.00187618	0.00187618	0.00187618	0.00187618	0	0	0	0	0	0	0	0	0	0	0	0	0	0	0	0.00186046	0.00186046	0.00186046	0.00186046	0.00186046
556263	GCA_000158295.2_Fuso_sp_D12_V2_genomic.fna.gz	Fusobacterium necrophorum D12	strain=D12	1960925	0	0	0	0	0	0	0	0	0	0	0	0	0	0	0	0	0	0	0	0	0	0	0	0	0	0	0	0	0	0	0	0	0	0	0	0	0	0	0	0	0	0	0	0	0
556264	GCA_000158535.2_Fuso_nucl_D11_V2_genomic.fna.gz	Fusobacterium nucleatum subsp. animalis D11	strain=D11	2363537	0	0	0	0	0	0	0	0	0	0	0.00087745	0.00087745	0.00087745	0.00087745	0.00087745	0.000772515	0.000772515	0.000772515	0.000772515	0.000772515	0.000693045	0.000693045	0.000693045	0.000693045	0.000693045	0	0	0	0	0	0	0	0	0	0	0.000718229	0.000718229	0.000718229	0.000718229	0.000718229	0.000644431	0.000644431	0.000644431	0.000644431	0.000644431
556266	GCA_000158395.1_ASM15839v1_genomic.fna.gz	Escherichia coli D9	strain=D9	4764345	0.031818	0.031818	0.031818	0.031818	0.031818	0.0191644	0.0191644	0.0191644	0.0191644	0.0191644	0.0166906	0.0166906	0.0166906	0.0166906	0.0166906	0.0146945	0.0146945	0.0146945	0.0146945	0.0146945	0.0131829	0.0131829	0.0131829	0.0131829	0.0131829	0.0671563	0.0671563	0.0671563	0.0671563	0.0671563	0.0358189	0.0358189	0.0358189	0.0358189	0.0358189	0.0315428	0.0315428	0.0315428	0.0315428	0.0315428	0.0283018	0.0283018	0.0283018	0.0283018	0.0283018
556268	GCA_000158475.2_Oxal_for_HOxBLS_2_V2_genomic.fna.gz	Oxalobacter formigenes HOxBLS	strain=HOxBLS	2488386	0	0	0	0	0	0	0	0	0	0	0	0	0	0	0	0	0	0	0	0	0	0	0	0	0	0	0	0	0	0	0	0	0	0	0	0	0	0	0	0	0	0	0	0	0
556269	GCA_000158495.1_ASM15849v1_genomic.fna.gz	Oxalobacter formigenes OXCC13	strain=OXCC13	2436766	0	0	0	0	0	0	0	0	0	0	0	0	0	0	0	0	0	0	0	0	0.00093684	0.00093684	0.00093684	0.00093684	0.00093684	0	0	0	0	0	0	0	0	0	0	0	0	0	0	0	0	0	0	0	0
556270	GCA_000158555.2_Erys_bact_D7_V2_genomic.fna.gz	Coprobacillus sp. D7	strain=D7	3527730	0	0	0	0	0	0	0	0	0	0	0.0041518	0.0041518	0.0041518	0.0041518	0.0041518	0.00365528	0.00365528	0.00365528	0.00365528	0.00365528	0.00327926	0.00327926	0.00327926	0.00327926	0.00327926	0	0	0	0	0	0	0	0	0	0	0.00352468	0.00352468	0.00352468	0.00352468	0.00352468	0.00316252	0.00316252	0.00316252	0.00316252	0.00316252
559301	GCA_000155935.2_Lacto_gasseri_MV-22_V2_genomic.fna.gz	Lactobacillus gasseri MV-22	strain=MV-22	1930436	0	0	0	0	0	0.000824501	0.000824501	0.000824501	0.000824501	0.000824501	0.00071807	0.00071807	0.00071807	0.00071807	0.00071807	0.000632196	0.000632196	0.000632196	0.000632196	0.000632196	0.000567161	0.000567161	0.000567161	0.000567161	0.000567161	0	0	0	0	0	0.000685675	0.000685675	0.000685675	0.000685675	0.000685675	0.000603819	0.000603819	0.000603819	0.000603819	0.000603819	0.000541777	0.000541777	0.000541777	0.000541777	0.000541777
562983	GCA_000204335.2_Geme_sang_M325_V2_genomic.fna.gz	Gemella sanguinis M325	strain=M325	1756105	0	0	0	0	0	0	0	0	0	0	0.0032818	0.0032818	0.0032818	0.0032818	0.0032818	0.00288933	0.00288933	0.00288933	0.00288933	0.00288933	0.0025921	0.0025921	0.0025921	0.0025921	0.0025921	0	0	0	0	0	0	0	0	0	0	0.00272081	0.00272081	0.00272081	0.00272081	0.00272081	0.00244125	0.00244125	0.00244125	0.00244125	0.00244125
563191	GCA_000174215.1_ASM17421v1_genomic.fna.gz	Acidaminococcus sp. D21	strain=D21	2238973	0	0	0	0	0	0	0	0	0	0	0	0	0	0	0	0	0	0	0	0	0.0015216	0.0015216	0.0015216	0.0015216	0.0015216	0	0	0	0	0	0	0	0	0	0	0	0	0	0	0	0	0	0	0	0
563192	GCA_000185705.2_Bilo_wads_3_1_6_V2_genomic.fna.gz	Bilophila wadsworthia 3_1_6	strain=3_1_6	4391194	0	0	0	0	0	0	0	0	0	0	0.00460423	0.00460423	0.00460423	0.00460423	0.00460423	0.00405361	0.00405361	0.00405361	0.00405361	0.00405361	0.00363661	0.00363661	0.00363661	0.00363661	0.00363661	0	0	0	0	0	0	0	0	0	0	0.004295	0.004295	0.004295	0.004295	0.004295	0.00385369	0.00385369	0.00385369	0.00385369	0.00385369
563193	GCA_000162275.1_ASM16227v1_genomic.fna.gz	Parabacteroides sp. D13	strain=D13	5370710	0	0	0	0	0	0.0214861	0.0214861	0.0214861	0.0214861	0.0214861	0.0187126	0.0187126	0.0187126	0.0187126	0.0187126	0.0164747	0.0164747	0.0164747	0.0164747	0.0164747	0.0147799	0.0147799	0.0147799	0.0147799	0.0147799	0	0	0	0	0	0.0361229	0.0361229	0.0361229	0.0361229	0.0361229	0.0318106	0.0318106	0.0318106	0.0318106	0.0318106	0.028542	0.028542	0.028542	0.028542	0.028542
565040	GCA_000196575.1_ASM19657v1_genomic.fna.gz	Bifidobacterium longum subsp. infantis 157F	strain=157F	2408831	0.00236102	0.00236102	0.00236102	0.00236102	0.00236102	0.00142207	0.00142207	0.00142207	0.00142207	0.00142207	0.0012385	0.0012385	0.0012385	0.0012385	0.0012385	0.00109039	0.00109039	0.00109039	0.00109039	0.00109039	0.000978221	0.000978221	0.000978221	0.000978221	0.000978221	0.0042463	0.0042463	0.0042463	0.0042463	0.0042463	0.00226483	0.00226483	0.00226483	0.00226483	0.00226483	0.00199446	0.00199446	0.00199446	0.00199446	0.00199446	0.00178953	0.00178953	0.00178953	0.00178953	0.00178953
565042	GCA_000196555.1_ASM19655v1_genomic.fna.gz	Bifidobacterium longum subsp. longum JCM 1217	strain=JCM 1217	2385164	0	0	0	0	0	0.00142207	0.00142207	0.00142207	0.00142207	0.00142207	0.0012385	0.0012385	0.0012385	0.0012385	0.0012385	0.00109039	0.00109039	0.00109039	0.00109039	0.00109039	0.000978221	0.000978221	0.000978221	0.000978221	0.000978221	0	0	0	0	0	0.00226483	0.00226483	0.00226483	0.00226483	0.00226483	0.00199446	0.00199446	0.00199446	0.00199446	0.00199446	0.00178953	0.00178953	0.00178953	0.00178953	0.00178953
565665	GCA_000176295.1_EFCS_D344SRF_V1_genomic.fna.gz	Enterococcus faecium D344SRF	strain=D344SRF	2745337	0	0	0	0	0	0	0	0	0	0	0	0	0	0	0	0	0	0	0	0	0	0	0	0	0	0	0	0	0	0	0	0	0	0	0	0	0	0	0	0	0	0	0	0	0
566546	GCA_000147755.2_ASM14775v1_genomic.fna.gz	Escherichia coli W	strain=W	4941083	0	0	0	0	0	0	0	0	0	0	0	0	0	0	0	3.39568e-05	3.39568e-05	3.39568e-05	3.39568e-05	3.39568e-05	3.04636e-05	3.04636e-05	3.04636e-05	3.04636e-05	3.04636e-05	0	0	0	0	0	0	0	0	0	0	0	0	0	0	0	3.18117e-05	3.18117e-05	3.18117e-05	3.18117e-05	3.18117e-05
566552	GCA_000173455.1_ASM17345v1_genomic.fna.gz	Bifidobacterium catenulatum DSM 16992 = JCM 1194 = LMG 11043	strain=DSM 16992	2058429	0	0	0	0	0	0	0	0	0	0	0	0	0	0	0	0.00473738	0.00473738	0.00473738	0.00473738	0.00473738	0.00425003	0.00425003	0.00425003	0.00425003	0.00425003	0	0	0	0	0	0	0	0	0	0	0	0	0	0	0	0.00466573	0.00466573	0.00466573	0.00466573	0.00466573
568816	GCA_000230275.1_ASM23027v1_genomic.fna.gz	Acidaminococcus intestini RyC-MR95	strain=RyC-MR95	2487765	0	0	0	0	0	0	0	0	0	0	0.00192646	0.00192646	0.00192646	0.00192646	0.00192646	0.00169608	0.00169608	0.00169608	0.00169608	0.00169608	0.0015216	0.0015216	0.0015216	0.0015216	0.0015216	0	0	0	0	0	0	0	0	0	0	0.00159686	0.00159686	0.00159686	0.00159686	0.00159686	0.00143278	0.00143278	0.00143278	0.00143278	0.00143278
573235	GCA_000091005.1_ASM9100v1_genomic.fna.gz	Escherichia coli O26:H11 str. 11368	strain=11368	5855531	0	0	0	0	0	0	0	0	0	0	3.85694e-05	3.85694e-05	3.85694e-05	3.85694e-05	3.85694e-05	3.39568e-05	3.39568e-05	3.39568e-05	3.39568e-05	3.39568e-05	3.04636e-05	3.04636e-05	3.04636e-05	3.04636e-05	3.04636e-05	0	0	0	0	0	0	0	0	0	0	3.54547e-05	3.54547e-05	3.54547e-05	3.54547e-05	3.54547e-05	3.18117e-05	3.18117e-05	3.18117e-05	3.18117e-05	3.18117e-05
573236	GCA_000092765.1_ASM9276v1_genomic.fna.gz	Bifidobacterium animalis subsp. lactis V9	strain=V9	1944050	0	0	0	0	0	0	0	0	0	0	0	0	0	0	0	0	0	0	0	0	0	0	0	0	0	0	0	0	0	0	0	0	0	0	0	0	0	0	0	0	0	0	0	0	0
574521	GCA_000026545.1_ASM2654v1_genomic.fna.gz	Escherichia coli O127:H6 str. E2348/69	strain=E2348/69	5069678	0	0	0	0	0	0	0	0	0	0	3.85694e-05	3.85694e-05	3.85694e-05	3.85694e-05	3.85694e-05	3.39568e-05	3.39568e-05	3.39568e-05	3.39568e-05	3.39568e-05	3.04636e-05	3.04636e-05	3.04636e-05	3.04636e-05	3.04636e-05	0	0	0	0	0	0	0	0	0	0	3.54547e-05	3.54547e-05	3.54547e-05	3.54547e-05	3.54547e-05	3.18117e-05	3.18117e-05	3.18117e-05	3.18117e-05	3.18117e-05
575599	GCA_000162395.1_ASM16239v1_genomic.fna.gz	Lactobacillus fermentum 28-3-CHN	strain=28-3-CHN	2026518	0	0	0	0	0	0	0	0	0	0	0	0	0	0	0	0	0	0	0	0	0	0	0	0	0	0	0	0	0	0	0	0	0	0	0	0	0	0	0	0	0	0	0	0	0
575611	GCA_000162455.1_ASM16245v1_genomic.fna.gz	Prevotella buccae D17	strain=D17	3357950	0	0	0	0	0	0	0	0	0	0	0	0	0	0	0	0	0	0	0	0	0	0	0	0	0	0	0	0	0	0	0	0	0	0	0	0	0	0	0	0	0	0	0	0	0
580050	GCA_000022705.1_ASM2270v1_genomic.fna.gz	Bifidobacterium animalis subsp. lactis Bl-04	strain=Bl-04; ATCC SD5219	1938709	0	0	0	0	0	0	0	0	0	0	0	0	0	0	0	0	0	0	0	0	0.000249157	0.000249157	0.000249157	0.000249157	0.000249157	0	0	0	0	0	0	0	0	0	0	0	0	0	0	0	0	0	0	0	0
585034	GCA_000026265.1_ASM2626v1_genomic.fna.gz	Escherichia coli IAI1	strain=IAI1	4700560	0	0	0	0	0	4.4286e-05	4.4286e-05	4.4286e-05	4.4286e-05	4.4286e-05	3.85694e-05	3.85694e-05	3.85694e-05	3.85694e-05	3.85694e-05	3.39568e-05	3.39568e-05	3.39568e-05	3.39568e-05	3.39568e-05	3.04636e-05	3.04636e-05	3.04636e-05	3.04636e-05	3.04636e-05	0	0	0	0	0	4.02611e-05	4.02611e-05	4.02611e-05	4.02611e-05	4.02611e-05	3.54547e-05	3.54547e-05	3.54547e-05	3.54547e-05	3.54547e-05	3.18117e-05	3.18117e-05	3.18117e-05	3.18117e-05	3.18117e-05
585035	GCA_000026285.2_ASM2628v2_genomic.fna.gz	Escherichia coli S88	strain=S88	5166121	0	0	0	0	0	0	0	0	0	0	0	0	0	0	0	3.39568e-05	3.39568e-05	3.39568e-05	3.39568e-05	3.39568e-05	3.04636e-05	3.04636e-05	3.04636e-05	3.04636e-05	3.04636e-05	0	0	0	0	0	0	0	0	0	0	0	0	0	0	0	3.18117e-05	3.18117e-05	3.18117e-05	3.18117e-05	3.18117e-05
585054	GCA_000026225.1_ASM2622v1_genomic.fna.gz	Escherichia fergusonii ATCC 35469	-	4643861	0	0	0	0	0	0	0	0	0	0	0	0	0	0	0	0.000858784	0.000858784	0.000858784	0.000858784	0.000858784	0.000770439	0.000770439	0.000770439	0.000770439	0.000770439	0	0	0	0	0	0	0	0	0	0	0	0	0	0	0	0.000723568	0.000723568	0.000723568	0.000723568	0.000723568
585055	GCA_000026245.1_ASM2624v1_genomic.fna.gz	Escherichia coli 55989	strain=55989	5154862	7.35266e-05	7.35266e-05	7.35266e-05	7.35266e-05	7.35266e-05	4.4286e-05	4.4286e-05	4.4286e-05	4.4286e-05	4.4286e-05	3.85694e-05	3.85694e-05	3.85694e-05	3.85694e-05	3.85694e-05	3.39568e-05	3.39568e-05	3.39568e-05	3.39568e-05	3.39568e-05	3.04636e-05	3.04636e-05	3.04636e-05	3.04636e-05	3.04636e-05	7.54848e-05	7.54848e-05	7.54848e-05	7.54848e-05	7.54848e-05	4.02611e-05	4.02611e-05	4.02611e-05	4.02611e-05	4.02611e-05	3.54547e-05	3.54547e-05	3.54547e-05	3.54547e-05	3.54547e-05	3.18117e-05	3.18117e-05	3.18117e-05	3.18117e-05	3.18117e-05
585056	GCA_000026325.2_ASM2632v2_genomic.fna.gz	Escherichia coli UMN026	strain=UMN026	5358200	0	0	0	0	0	0	0	0	0	0	3.85694e-05	3.85694e-05	3.85694e-05	3.85694e-05	3.85694e-05	3.39568e-05	3.39568e-05	3.39568e-05	3.39568e-05	3.39568e-05	3.04636e-05	3.04636e-05	3.04636e-05	3.04636e-05	3.04636e-05	0	0	0	0	0	0	0	0	0	0	3.54547e-05	3.54547e-05	3.54547e-05	3.54547e-05	3.54547e-05	3.18117e-05	3.18117e-05	3.18117e-05	3.18117e-05	3.18117e-05
585057	GCA_000026345.1_ASM2634v1_genomic.fna.gz	Escherichia coli IAI39	strain=IAI39	5132068	0	0	0	0	0	4.4286e-05	4.4286e-05	4.4286e-05	4.4286e-05	4.4286e-05	3.85694e-05	3.85694e-05	3.85694e-05	3.85694e-05	3.85694e-05	3.39568e-05	3.39568e-05	3.39568e-05	3.39568e-05	3.39568e-05	3.04636e-05	3.04636e-05	3.04636e-05	3.04636e-05	3.04636e-05	0	0	0	0	0	4.02611e-05	4.02611e-05	4.02611e-05	4.02611e-05	4.02611e-05	3.54547e-05	3.54547e-05	3.54547e-05	3.54547e-05	3.54547e-05	3.18117e-05	3.18117e-05	3.18117e-05	3.18117e-05	3.18117e-05
585394	GCA_000225345.1_ASM22534v1_genomic.fna.gz	Roseburia hominis A2-183	strain=A2-183	3592125	0.0126249	0.0126249	0.0126249	0.0126249	0.0126249	0.00760413	0.00760413	0.00760413	0.00760413	0.00760413	0.00662256	0.00662256	0.00662256	0.00662256	0.00662256	0.00583056	0.00583056	0.00583056	0.00583056	0.00583056	0.00523076	0.00523076	0.00523076	0.00523076	0.00523076	0.0157647	0.0157647	0.0157647	0.0157647	0.0157647	0.00840839	0.00840839	0.00840839	0.00840839	0.00840839	0.00740459	0.00740459	0.00740459	0.00740459	0.00740459	0.00664377	0.00664377	0.00664377	0.00664377	0.00664377
585395	GCA_000010745.1_ASM1074v1_genomic.fna.gz	Escherichia coli O103:H2 str. 12009	strain=12009	5524860	7.35266e-05	7.35266e-05	7.35266e-05	7.35266e-05	7.35266e-05	4.4286e-05	4.4286e-05	4.4286e-05	4.4286e-05	4.4286e-05	3.85694e-05	3.85694e-05	3.85694e-05	3.85694e-05	3.85694e-05	3.39568e-05	3.39568e-05	3.39568e-05	3.39568e-05	3.39568e-05	3.04636e-05	3.04636e-05	3.04636e-05	3.04636e-05	3.04636e-05	7.54848e-05	7.54848e-05	7.54848e-05	7.54848e-05	7.54848e-05	4.02611e-05	4.02611e-05	4.02611e-05	4.02611e-05	4.02611e-05	3.54547e-05	3.54547e-05	3.54547e-05	3.54547e-05	3.54547e-05	3.18117e-05	3.18117e-05	3.18117e-05	3.18117e-05	3.18117e-05
585396	GCA_000010765.1_ASM1076v1_genomic.fna.gz	Escherichia coli O111:H- str. 11128	strain=11128	5766081	0	0	0	0	0	4.4286e-05	4.4286e-05	4.4286e-05	4.4286e-05	4.4286e-05	3.85694e-05	3.85694e-05	3.85694e-05	3.85694e-05	3.85694e-05	3.39568e-05	3.39568e-05	3.39568e-05	3.39568e-05	3.39568e-05	3.04636e-05	3.04636e-05	3.04636e-05	3.04636e-05	3.04636e-05	0	0	0	0	0	4.02611e-05	4.02611e-05	4.02611e-05	4.02611e-05	4.02611e-05	3.54547e-05	3.54547e-05	3.54547e-05	3.54547e-05	3.54547e-05	3.18117e-05	3.18117e-05	3.18117e-05	3.18117e-05	3.18117e-05
585397	GCA_000026305.1_ASM2630v1_genomic.fna.gz	Escherichia coli ED1a	strain=ED1a	5209548	0	0	0	0	0	4.4286e-05	4.4286e-05	4.4286e-05	4.4286e-05	4.4286e-05	3.85694e-05	3.85694e-05	3.85694e-05	3.85694e-05	3.85694e-05	3.39568e-05	3.39568e-05	3.39568e-05	3.39568e-05	3.39568e-05	3.04636e-05	3.04636e-05	3.04636e-05	3.04636e-05	3.04636e-05	0	0	0	0	0	4.02611e-05	4.02611e-05	4.02611e-05	4.02611e-05	4.02611e-05	3.54547e-05	3.54547e-05	3.54547e-05	3.54547e-05	3.54547e-05	3.18117e-05	3.18117e-05	3.18117e-05	3.18117e-05	3.18117e-05
585501	GCA_000160635.1_ASM16063v1_genomic.fna.gz	Oribacterium sinus F0268	strain=F0268	2706954	0	0	0	0	0	0	0	0	0	0	0	0	0	0	0	0	0	0	0	0	0.000196427	0.000196427	0.000196427	0.000196427	0.000196427	0	0	0	0	0	0	0	0	0	0	0	0	0	0	0	0	0	0	0	0
585543	GCA_000162215.1_ASM16221v1_genomic.fna.gz	Bacteroides sp. D20	strain=D20	4487454	0	0	0	0	0	0	0	0	0	0	0	0	0	0	0	0	0	0	0	0	0	0	0	0	0	0	0	0	0	0	0	0	0	0	0	0	0	0	0	0	0	0	0	0	0
585544	GCA_000163675.1_ASM16367v1_genomic.fna.gz	Bacteroides sp. D22	strain=D22	6344045	0	0	0	0	0	0	0	0	0	0	0	0	0	0	0	0	0	0	0	0	0	0	0	0	0	0	0	0	0	0	0	0	0	0	0	0	0	0	0	0	0	0	0	0	0
586220	GCA_000160595.1_ASM16059v1_genomic.fna.gz	Leuconostoc mesenteroides subsp. cremoris ATCC 19254	strain=ATCC 19254	1735074	0	0	0	0	0	0	0	0	0	0	0	0	0	0	0	0.00279289	0.00279289	0.00279289	0.00279289	0.00279289	0.00250558	0.00250558	0.00250558	0.00250558	0.00250558	0	0	0	0	0	0	0	0	0	0	0	0	0	0	0	0.00232836	0.00232836	0.00232836	0.00232836	0.00232836
591001	GCA_000025305.1_ASM2530v1_genomic.fna.gz	Acidaminococcus fermentans DSM 20731	strain=DSM 20731	2329769	0	0	0	0	0	0.0051554	0.0051554	0.0051554	0.0051554	0.0051554	0.00448992	0.00448992	0.00448992	0.00448992	0.00448992	0.00395297	0.00395297	0.00395297	0.00395297	0.00395297	0.00354632	0.00354632	0.00354632	0.00354632	0.00354632	0	0	0	0	0	0.00440425	0.00440425	0.00440425	0.00440425	0.00440425	0.00387847	0.00387847	0.00387847	0.00387847	0.00387847	0.00347996	0.00347996	0.00347996	0.00347996	0.00347996
591020	GCA_000022245.1_ASM2224v1_genomic.fna.gz	Shigella flexneri 2002017	strain=2002017	4894492	0	0	0	0	0	0	0	0	0	0	0.000197112	0.000197112	0.000197112	0.000197112	0.000197112	0.000173539	0.000173539	0.000173539	0.000173539	0.000173539	0.000155687	0.000155687	0.000155687	0.000155687	0.000155687	0	0	0	0	0	0	0	0	0	0	0.000162062	0.000162062	0.000162062	0.000162062	0.000162062	0.00014541	0.00014541	0.00014541	0.00014541	0.00014541
591946	GCA_000284495.1_ASM28449v1_genomic.fna.gz	Escherichia coli LF82	strain=LF82	4773108	0	0	0	0	0	4.4286e-05	4.4286e-05	4.4286e-05	4.4286e-05	4.4286e-05	3.85694e-05	3.85694e-05	3.85694e-05	3.85694e-05	3.85694e-05	3.39568e-05	3.39568e-05	3.39568e-05	3.39568e-05	3.39568e-05	3.04636e-05	3.04636e-05	3.04636e-05	3.04636e-05	3.04636e-05	0	0	0	0	0	4.02611e-05	4.02611e-05	4.02611e-05	4.02611e-05	4.02611e-05	3.54547e-05	3.54547e-05	3.54547e-05	3.54547e-05	3.54547e-05	3.18117e-05	3.18117e-05	3.18117e-05	3.18117e-05	3.18117e-05
592028	GCA_000160055.1_ASM16005v1_genomic.fna.gz	Dialister invisus DSM 15470	strain=DSM 15470	1895960	0	0	0	0	0	0.0117208	0.0117208	0.0117208	0.0117208	0.0117208	0.0102078	0.0102078	0.0102078	0.0102078	0.0102078	0.00898706	0.00898706	0.00898706	0.00898706	0.00898706	0.00806254	0.00806254	0.00806254	0.00806254	0.00806254	0	0	0	0	0	0.0128256	0.0128256	0.0128256	0.0128256	0.0128256	0.0112944	0.0112944	0.0112944	0.0112944	0.0112944	0.0101339	0.0101339	0.0101339	0.0101339	0.0101339
595495	GCA_000147855.3_ASM14785v3_genomic.fna.gz	Escherichia coli KO11FL	strain=KO11	5029323	0	0	0	0	0	4.4286e-05	4.4286e-05	4.4286e-05	4.4286e-05	4.4286e-05	3.85694e-05	3.85694e-05	3.85694e-05	3.85694e-05	3.85694e-05	3.39568e-05	3.39568e-05	3.39568e-05	3.39568e-05	3.39568e-05	3.04636e-05	3.04636e-05	3.04636e-05	3.04636e-05	3.04636e-05	0	0	0	0	0	4.02611e-05	4.02611e-05	4.02611e-05	4.02611e-05	4.02611e-05	3.54547e-05	3.54547e-05	3.54547e-05	3.54547e-05	3.54547e-05	3.18117e-05	3.18117e-05	3.18117e-05	3.18117e-05	3.18117e-05
595496	GCA_000022345.1_ASM2234v1_genomic.fna.gz	Escherichia coli BW2952	strain=K-12 substr. BW2952	4578159	0	0	0	0	0	0	0	0	0	0	0	0	0	0	0	3.39568e-05	3.39568e-05	3.39568e-05	3.39568e-05	3.39568e-05	3.04636e-05	3.04636e-05	3.04636e-05	3.04636e-05	3.04636e-05	0	0	0	0	0	0	0	0	0	0	0	0	0	0	0	3.18117e-05	3.18117e-05	3.18117e-05	3.18117e-05	3.18117e-05
596322	GCA_000174715.1_ASM17471v1_genomic.fna.gz	Streptococcus salivarius SK126	strain=SK126	2128332	0	0	0	0	0	0	0	0	0	0	0	0	0	0	0	0.000804329	0.000804329	0.000804329	0.000804329	0.000804329	0.000721586	0.000721586	0.000721586	0.000721586	0.000721586	0	0	0	0	0	0	0	0	0	0	0	0	0	0	0	0.00067571	0.00067571	0.00067571	0.00067571	0.00067571
596329	GCA_000178095.1_ASM17809v1_genomic.fna.gz	Peptostreptococcus anaerobius 653-L	strain=653-L	2083092	0	0	0	0	0	0	0	0	0	0	0	0	0	0	0	0	0	0	0	0	0.00164537	0.00164537	0.00164537	0.00164537	0.00164537	0	0	0	0	0	0	0	0	0	0	0	0	0	0	0	0	0	0	0	0
622312	GCA_000174195.1_ASM17419v1_genomic.fna.gz	Roseburia inulinivorans DSM 16841	strain=DSM 16841	4048462	0.025487	0.025487	0.025487	0.025487	0.025487	0.0153512	0.0153512	0.0153512	0.0153512	0.0153512	0.0133696	0.0133696	0.0133696	0.0133696	0.0133696	0.0117707	0.0117707	0.0117707	0.0117707	0.0117707	0.0105598	0.0105598	0.0105598	0.0105598	0.0105598	0.0497808	0.0497808	0.0497808	0.0497808	0.0497808	0.0265514	0.0265514	0.0265514	0.0265514	0.0265514	0.0233817	0.0233817	0.0233817	0.0233817	0.0233817	0.0209792	0.0209792	0.0209792	0.0209792	0.0209792
626939	GCA_000188175.1_ASM18817v1_genomic.fna.gz	Phascolarctobacterium succinatutens YIT 12067	strain=YIT 12067	2121954	0	0	0	0	0	0	0	0	0	0	0.00455786	0.00455786	0.00455786	0.00455786	0.00455786	0.00401279	0.00401279	0.00401279	0.00401279	0.00401279	0.00359998	0.00359998	0.00359998	0.00359998	0.00359998	0	0	0	0	0	0	0	0	0	0	0.00418692	0.00418692	0.00418692	0.00418692	0.00418692	0.00375671	0.00375671	0.00375671	0.00375671	0.00375671
630527	GCA_000175055.1_ASM17505v1_genomic.fna.gz	Lactobacillus gasseri 202-4	strain=202-4	1820250	0	0	0	0	0	0	0	0	0	0	0	0	0	0	0	0	0	0	0	0	0.000567161	0.000567161	0.000567161	0.000567161	0.000567161	0	0	0	0	0	0	0	0	0	0	0	0	0	0	0	0	0	0	0	0
633699	GCA_000091405.1_ASM9140v1_genomic.fna.gz	Lactobacillus johnsonii FI9785	strain=FI9785	1785116	0	0	0	0	0	0	0	0	0	0	0	0	0	0	0	0	0	0	0	0	0.000911774	0.000911774	0.000911774	0.000911774	0.000911774	0	0	0	0	0	0	0	0	0	0	0	0	0	0	0	0	0	0	0	0
638301	GCA_000160675.1_ASM16067v1_genomic.fna.gz	Granulicatella adiacens ATCC 49175	strain=ATCC 49175	1947166	0	0	0	0	0	0	0	0	0	0	0.00305715	0.00305715	0.00305715	0.00305715	0.00305715	0.00269154	0.00269154	0.00269154	0.00269154	0.00269154	0.00241466	0.00241466	0.00241466	0.00241466	0.00241466	0	0	0	0	0	0	0	0	0	0	0.0024975	0.0024975	0.0024975	0.0024975	0.0024975	0.00224088	0.00224088	0.00224088	0.00224088	0.00224088
640131	GCA_000025465.1_ASM2546v1_genomic.fna.gz	Klebsiella variicola At-22	strain=At-22	5458505	0	0	0	0	0	0	0	0	0	0	0	0	0	0	0	0.00159924	0.00159924	0.00159924	0.00159924	0.00159924	0.00143473	0.00143473	0.00143473	0.00143473	0.00143473	0	0	0	0	0	0	0	0	0	0	0	0	0	0	0	0.00134696	0.00134696	0.00134696	0.00134696	0.00134696
645663	GCA_000174935.1_ASM17493v1_genomic.fna.gz	Enterococcus faecium E1039	strain=E1039	2503230	0	0	0	0	0	0	0	0	0	0	0	0	0	0	0	0	0	0	0	0	0	0	0	0	0	0	0	0	0	0	0	0	0	0	0	0	0	0	0	0	0	0	0	0	0
649757	GCA_000332875.2_ASM33287v2_genomic.fna.gz	Anaerostipes hadrus DSM 3319	strain=DSM 3319	2772228	0	0	0	0	0	0	0	0	0	0	0	0	0	0	0	0	0	0	0	0	0	0	0	0	0	0	0	0	0	0	0	0	0	0	0	0	0	0	0	0	0	0	0	0	0
655811	GCA_000163295.1_ASM16329v1_genomic.fna.gz	Anaerococcus vaginalis ATCC 51170	strain=ATCC 51170	1891767	0	0	0	0	0	0	0	0	0	0	0	0	0	0	0	0.00296625	0.00296625	0.00296625	0.00296625	0.00296625	0.00266111	0.00266111	0.00266111	0.00266111	0.00266111	0	0	0	0	0	0	0	0	0	0	0	0	0	0	0	0.00246014	0.00246014	0.00246014	0.00246014	0.00246014
655817	GCA_000148365.1_ASM14836v1_genomic.fna.gz	Escherichia coli ABU 83972	strain=ABU 83972	5132961	0	0	0	0	0	4.4286e-05	4.4286e-05	4.4286e-05	4.4286e-05	4.4286e-05	3.85694e-05	3.85694e-05	3.85694e-05	3.85694e-05	3.85694e-05	3.39568e-05	3.39568e-05	3.39568e-05	3.39568e-05	3.39568e-05	3.04636e-05	3.04636e-05	3.04636e-05	3.04636e-05	3.04636e-05	0	0	0	0	0	4.02611e-05	4.02611e-05	4.02611e-05	4.02611e-05	4.02611e-05	3.54547e-05	3.54547e-05	3.54547e-05	3.54547e-05	3.54547e-05	3.18117e-05	3.18117e-05	3.18117e-05	3.18117e-05	3.18117e-05
656372	GCA_000190795.1_ASM19079v1_genomic.fna.gz	Escherichia coli E1167	strain=E1167	4942767	0	0	0	0	0	0	0	0	0	0	3.85694e-05	3.85694e-05	3.85694e-05	3.85694e-05	3.85694e-05	3.39568e-05	3.39568e-05	3.39568e-05	3.39568e-05	3.39568e-05	3.04636e-05	3.04636e-05	3.04636e-05	3.04636e-05	3.04636e-05	0	0	0	0	0	0	0	0	0	0	3.54547e-05	3.54547e-05	3.54547e-05	3.54547e-05	3.54547e-05	3.18117e-05	3.18117e-05	3.18117e-05	3.18117e-05	3.18117e-05
656374	GCA_000190815.1_ASM19081v1_genomic.fna.gz	Escherichia coli E1520	strain=E1520	4932139	0	0	0	0	0	4.4286e-05	4.4286e-05	4.4286e-05	4.4286e-05	4.4286e-05	3.85694e-05	3.85694e-05	3.85694e-05	3.85694e-05	3.85694e-05	3.39568e-05	3.39568e-05	3.39568e-05	3.39568e-05	3.39568e-05	3.04636e-05	3.04636e-05	3.04636e-05	3.04636e-05	3.04636e-05	0	0	0	0	0	4.02611e-05	4.02611e-05	4.02611e-05	4.02611e-05	4.02611e-05	3.54547e-05	3.54547e-05	3.54547e-05	3.54547e-05	3.54547e-05	3.18117e-05	3.18117e-05	3.18117e-05	3.18117e-05	3.18117e-05
656379	GCA_000163215.1_ASM16321v1_genomic.fna.gz	Escherichia coli FVEC1302	strain=FVEC1302	5339642	0	0	0	0	0	4.4286e-05	4.4286e-05	4.4286e-05	4.4286e-05	4.4286e-05	3.85694e-05	3.85694e-05	3.85694e-05	3.85694e-05	3.85694e-05	3.39568e-05	3.39568e-05	3.39568e-05	3.39568e-05	3.39568e-05	3.04636e-05	3.04636e-05	3.04636e-05	3.04636e-05	3.04636e-05	0	0	0	0	0	4.02611e-05	4.02611e-05	4.02611e-05	4.02611e-05	4.02611e-05	3.54547e-05	3.54547e-05	3.54547e-05	3.54547e-05	3.54547e-05	3.18117e-05	3.18117e-05	3.18117e-05	3.18117e-05	3.18117e-05
656380	GCA_000163235.1_ASM16323v1_genomic.fna.gz	Escherichia coli FVEC1412	strain=FVEC1412	5234178	0	0	0	0	0	0	0	0	0	0	3.85694e-05	3.85694e-05	3.85694e-05	3.85694e-05	3.85694e-05	3.39568e-05	3.39568e-05	3.39568e-05	3.39568e-05	3.39568e-05	3.04636e-05	3.04636e-05	3.04636e-05	3.04636e-05	3.04636e-05	0	0	0	0	0	0	0	0	0	0	3.54547e-05	3.54547e-05	3.54547e-05	3.54547e-05	3.54547e-05	3.18117e-05	3.18117e-05	3.18117e-05	3.18117e-05	3.18117e-05
656383	GCA_000190855.1_ASM19085v1_genomic.fna.gz	Escherichia coli H120	strain=H120	5091022	0	0	0	0	0	4.4286e-05	4.4286e-05	4.4286e-05	4.4286e-05	4.4286e-05	3.85694e-05	3.85694e-05	3.85694e-05	3.85694e-05	3.85694e-05	3.39568e-05	3.39568e-05	3.39568e-05	3.39568e-05	3.39568e-05	3.04636e-05	3.04636e-05	3.04636e-05	3.04636e-05	3.04636e-05	0	0	0	0	0	4.02611e-05	4.02611e-05	4.02611e-05	4.02611e-05	4.02611e-05	3.54547e-05	3.54547e-05	3.54547e-05	3.54547e-05	3.54547e-05	3.18117e-05	3.18117e-05	3.18117e-05	3.18117e-05	3.18117e-05
656388	GCA_000190895.1_ASM19089v1_genomic.fna.gz	Escherichia coli H252	strain=H252	5266973	0	0	0	0	0	0	0	0	0	0	0	0	0	0	0	3.39568e-05	3.39568e-05	3.39568e-05	3.39568e-05	3.39568e-05	3.04636e-05	3.04636e-05	3.04636e-05	3.04636e-05	3.04636e-05	0	0	0	0	0	0	0	0	0	0	0	0	0	0	0	3.18117e-05	3.18117e-05	3.18117e-05	3.18117e-05	3.18117e-05
656390	GCA_000190915.1_ASM19091v1_genomic.fna.gz	Escherichia coli H263	strain=H263	5239070	0	0	0	0	0	4.4286e-05	4.4286e-05	4.4286e-05	4.4286e-05	4.4286e-05	3.85694e-05	3.85694e-05	3.85694e-05	3.85694e-05	3.85694e-05	3.39568e-05	3.39568e-05	3.39568e-05	3.39568e-05	3.39568e-05	3.04636e-05	3.04636e-05	3.04636e-05	3.04636e-05	3.04636e-05	0	0	0	0	0	4.02611e-05	4.02611e-05	4.02611e-05	4.02611e-05	4.02611e-05	3.54547e-05	3.54547e-05	3.54547e-05	3.54547e-05	3.54547e-05	3.18117e-05	3.18117e-05	3.18117e-05	3.18117e-05	3.18117e-05
656393	GCA_000176695.2_ASM17669v2_genomic.fna.gz	Escherichia coli H299	strain=H299	5317843	0	0	0	0	0	0	0	0	0	0	0	0	0	0	0	3.39568e-05	3.39568e-05	3.39568e-05	3.39568e-05	3.39568e-05	3.04636e-05	3.04636e-05	3.04636e-05	3.04636e-05	3.04636e-05	0	0	0	0	0	0	0	0	0	0	0	0	0	0	0	3.18117e-05	3.18117e-05	3.18117e-05	3.18117e-05	3.18117e-05
656404	GCA_000191015.1_ASM19101v1_genomic.fna.gz	Escherichia coli H489	strain=H489	4876591	0	0	0	0	0	4.4286e-05	4.4286e-05	4.4286e-05	4.4286e-05	4.4286e-05	3.85694e-05	3.85694e-05	3.85694e-05	3.85694e-05	3.85694e-05	3.39568e-05	3.39568e-05	3.39568e-05	3.39568e-05	3.39568e-05	3.04636e-05	3.04636e-05	3.04636e-05	3.04636e-05	3.04636e-05	0	0	0	0	0	4.02611e-05	4.02611e-05	4.02611e-05	4.02611e-05	4.02611e-05	3.54547e-05	3.54547e-05	3.54547e-05	3.54547e-05	3.54547e-05	3.18117e-05	3.18117e-05	3.18117e-05	3.18117e-05	3.18117e-05
656408	GCA_000176675.2_ASM17667v2_genomic.fna.gz	Escherichia coli H591	strain=H591	4977803	0	0	0	0	0	4.4286e-05	4.4286e-05	4.4286e-05	4.4286e-05	4.4286e-05	3.85694e-05	3.85694e-05	3.85694e-05	3.85694e-05	3.85694e-05	3.39568e-05	3.39568e-05	3.39568e-05	3.39568e-05	3.39568e-05	3.04636e-05	3.04636e-05	3.04636e-05	3.04636e-05	3.04636e-05	0	0	0	0	0	4.02611e-05	4.02611e-05	4.02611e-05	4.02611e-05	4.02611e-05	3.54547e-05	3.54547e-05	3.54547e-05	3.54547e-05	3.54547e-05	3.18117e-05	3.18117e-05	3.18117e-05	3.18117e-05	3.18117e-05
656414	GCA_000176535.2_ASM17653v2_genomic.fna.gz	Escherichia coli H736	strain=H736	4707649	7.35266e-05	7.35266e-05	7.35266e-05	7.35266e-05	7.35266e-05	4.4286e-05	4.4286e-05	4.4286e-05	4.4286e-05	4.4286e-05	3.85694e-05	3.85694e-05	3.85694e-05	3.85694e-05	3.85694e-05	3.39568e-05	3.39568e-05	3.39568e-05	3.39568e-05	3.39568e-05	3.04636e-05	3.04636e-05	3.04636e-05	3.04636e-05	3.04636e-05	7.54848e-05	7.54848e-05	7.54848e-05	7.54848e-05	7.54848e-05	4.02611e-05	4.02611e-05	4.02611e-05	4.02611e-05	4.02611e-05	3.54547e-05	3.54547e-05	3.54547e-05	3.54547e-05	3.54547e-05	3.18117e-05	3.18117e-05	3.18117e-05	3.18117e-05	3.18117e-05
656417	GCA_000176555.2_ASM17655v2_genomic.fna.gz	Escherichia coli M605	strain=M605	5477953	0	0	0	0	0	0	0	0	0	0	0	0	0	0	0	3.39568e-05	3.39568e-05	3.39568e-05	3.39568e-05	3.39568e-05	3.04636e-05	3.04636e-05	3.04636e-05	3.04636e-05	3.04636e-05	0	0	0	0	0	0	0	0	0	0	0	0	0	0	0	3.18117e-05	3.18117e-05	3.18117e-05	3.18117e-05	3.18117e-05
656419	GCA_000176575.2_ASM17657v2_genomic.fna.gz	Escherichia coli M718	strain=M718	5413197	0	0	0	0	0	4.4286e-05	4.4286e-05	4.4286e-05	4.4286e-05	4.4286e-05	3.85694e-05	3.85694e-05	3.85694e-05	3.85694e-05	3.85694e-05	3.39568e-05	3.39568e-05	3.39568e-05	3.39568e-05	3.39568e-05	3.04636e-05	3.04636e-05	3.04636e-05	3.04636e-05	3.04636e-05	0	0	0	0	0	4.02611e-05	4.02611e-05	4.02611e-05	4.02611e-05	4.02611e-05	3.54547e-05	3.54547e-05	3.54547e-05	3.54547e-05	3.54547e-05	3.18117e-05	3.18117e-05	3.18117e-05	3.18117e-05	3.18117e-05
656420	GCA_000190955.1_ASM19095v1_genomic.fna.gz	Escherichia coli M863	strain=M863	5287955	0	0	0	0	0	0	0	0	0	0	3.85694e-05	3.85694e-05	3.85694e-05	3.85694e-05	3.85694e-05	3.39568e-05	3.39568e-05	3.39568e-05	3.39568e-05	3.39568e-05	3.04636e-05	3.04636e-05	3.04636e-05	3.04636e-05	3.04636e-05	0	0	0	0	0	0	0	0	0	0	3.54547e-05	3.54547e-05	3.54547e-05	3.54547e-05	3.54547e-05	3.18117e-05	3.18117e-05	3.18117e-05	3.18117e-05	3.18117e-05
656429	GCA_000190975.1_ASM19097v1_genomic.fna.gz	Escherichia coli TA007	strain=TA007	5299319	0	0	0	0	0	0	0	0	0	0	0	0	0	0	0	3.39568e-05	3.39568e-05	3.39568e-05	3.39568e-05	3.39568e-05	3.04636e-05	3.04636e-05	3.04636e-05	3.04636e-05	3.04636e-05	0	0	0	0	0	0	0	0	0	0	0	0	0	0	0	3.18117e-05	3.18117e-05	3.18117e-05	3.18117e-05	3.18117e-05
656437	GCA_000176615.2_ASM17661v2_genomic.fna.gz	Escherichia coli TA143	strain=TA143	4889152	0	0	0	0	0	4.4286e-05	4.4286e-05	4.4286e-05	4.4286e-05	4.4286e-05	3.85694e-05	3.85694e-05	3.85694e-05	3.85694e-05	3.85694e-05	3.39568e-05	3.39568e-05	3.39568e-05	3.39568e-05	3.39568e-05	3.04636e-05	3.04636e-05	3.04636e-05	3.04636e-05	3.04636e-05	0	0	0	0	0	4.02611e-05	4.02611e-05	4.02611e-05	4.02611e-05	4.02611e-05	3.54547e-05	3.54547e-05	3.54547e-05	3.54547e-05	3.54547e-05	3.18117e-05	3.18117e-05	3.18117e-05	3.18117e-05	3.18117e-05
656440	GCA_000176595.2_ASM17659v2_genomic.fna.gz	Escherichia coli TA206	strain=TA206	5122244	0	0	0	0	0	4.4286e-05	4.4286e-05	4.4286e-05	4.4286e-05	4.4286e-05	3.85694e-05	3.85694e-05	3.85694e-05	3.85694e-05	3.85694e-05	3.39568e-05	3.39568e-05	3.39568e-05	3.39568e-05	3.39568e-05	3.04636e-05	3.04636e-05	3.04636e-05	3.04636e-05	3.04636e-05	0	0	0	0	0	4.02611e-05	4.02611e-05	4.02611e-05	4.02611e-05	4.02611e-05	3.54547e-05	3.54547e-05	3.54547e-05	3.54547e-05	3.54547e-05	3.18117e-05	3.18117e-05	3.18117e-05	3.18117e-05	3.18117e-05
656443	GCA_000176635.2_ASM17663v2_genomic.fna.gz	Escherichia coli TA271	strain=TA271	5075824	0	0	0	0	0	0	0	0	0	0	0	0	0	0	0	3.39568e-05	3.39568e-05	3.39568e-05	3.39568e-05	3.39568e-05	3.04636e-05	3.04636e-05	3.04636e-05	3.04636e-05	3.04636e-05	0	0	0	0	0	0	0	0	0	0	0	0	0	0	0	3.18117e-05	3.18117e-05	3.18117e-05	3.18117e-05	3.18117e-05
656444	GCA_000176655.2_ASM17665v2_genomic.fna.gz	Escherichia coli TA280	strain=TA280	5296938	0	0	0	0	0	4.4286e-05	4.4286e-05	4.4286e-05	4.4286e-05	4.4286e-05	3.85694e-05	3.85694e-05	3.85694e-05	3.85694e-05	3.85694e-05	3.39568e-05	3.39568e-05	3.39568e-05	3.39568e-05	3.39568e-05	3.04636e-05	3.04636e-05	3.04636e-05	3.04636e-05	3.04636e-05	0	0	0	0	0	4.02611e-05	4.02611e-05	4.02611e-05	4.02611e-05	4.02611e-05	3.54547e-05	3.54547e-05	3.54547e-05	3.54547e-05	3.54547e-05	3.18117e-05	3.18117e-05	3.18117e-05	3.18117e-05	3.18117e-05
656449	GCA_000190995.1_ASM19099v1_genomic.fna.gz	Escherichia coli TW10509	strain=TW10509	5388952	0	0	0	0	0	0	0	0	0	0	3.85694e-05	3.85694e-05	3.85694e-05	3.85694e-05	3.85694e-05	3.39568e-05	3.39568e-05	3.39568e-05	3.39568e-05	3.39568e-05	3.04636e-05	3.04636e-05	3.04636e-05	3.04636e-05	3.04636e-05	0	0	0	0	0	0	0	0	0	0	3.54547e-05	3.54547e-05	3.54547e-05	3.54547e-05	3.54547e-05	3.18117e-05	3.18117e-05	3.18117e-05	3.18117e-05	3.18117e-05
657309	GCA_000210075.1_ASM21007v1_genomic.fna.gz	Bacteroides xylanisolvens XB1A	strain=XB1A	5976145	0	0	0	0	0	0.020807	0.020807	0.020807	0.020807	0.020807	0.0181211	0.0181211	0.0181211	0.0181211	0.0181211	0.015954	0.015954	0.015954	0.015954	0.015954	0.0143128	0.0143128	0.0143128	0.0143128	0.0143128	0	0	0	0	0	0.0191225	0.0191225	0.0191225	0.0191225	0.0191225	0.0168397	0.0168397	0.0168397	0.0168397	0.0168397	0.0151094	0.0151094	0.0151094	0.0151094	0.0151094
657313	GCA_000210035.1_ASM21003v1_genomic.fna.gz	Ruminococcus torques L2-14	strain=L2-14	3341681	0	0	0	0	0	0.00964137	0.00964137	0.00964137	0.00964137	0.00964137	0.00839681	0.00839681	0.00839681	0.00839681	0.00839681	0.00739264	0.00739264	0.00739264	0.00739264	0.00739264	0.00663214	0.00663214	0.00663214	0.00663214	0.00663214	0	0	0	0	0	0.00956144	0.00956144	0.00956144	0.00956144	0.00956144	0.00841999	0.00841999	0.00841999	0.00841999	0.00841999	0.00755484	0.00755484	0.00755484	0.00755484	0.00755484
657314	GCA_000210015.1_ASM21001v1_genomic.fna.gz	Blautia obeum A2-162	strain=A2-162	3757491	0	0	0	0	0	0.00479862	0.00479862	0.00479862	0.00479862	0.00479862	0.00417919	0.00417919	0.00417919	0.00417919	0.00417919	0.0036794	0.0036794	0.0036794	0.0036794	0.0036794	0.00330089	0.00330089	0.00330089	0.00330089	0.00330089	0	0	0	0	0	0.00404647	0.00404647	0.00404647	0.00404647	0.00404647	0.0035634	0.0035634	0.0035634	0.0035634	0.0035634	0.00319726	0.00319726	0.00319726	0.00319726	0.00319726
657315	GCA_000209995.1_ASM20999v1_genomic.fna.gz	Roseburia intestinalis M50/1	strain=M50/1	4143550	0.0100014	0.0100014	0.0100014	0.0100014	0.0100014	0.00602397	0.00602397	0.00602397	0.00602397	0.00602397	0.00524637	0.00524637	0.00524637	0.00524637	0.00524637	0.00461895	0.00461895	0.00461895	0.00461895	0.00461895	0.00414379	0.00414379	0.00414379	0.00414379	0.00414379	0.0153074	0.0153074	0.0153074	0.0153074	0.0153074	0.00816445	0.00816445	0.00816445	0.00816445	0.00816445	0.00718977	0.00718977	0.00718977	0.00718977	0.00718977	0.00645102	0.00645102	0.00645102	0.00645102	0.00645102
657317	GCA_000209955.1_ASM20995v1_genomic.fna.gz	[Eubacterium] rectale M104/1	strain=M104/1	3698419	0	0	0	0	0	0	0	0	0	0	0	0	0	0	0	0	0	0	0	0	0.000647012	0.000647012	0.000647012	0.000647012	0.000647012	0	0	0	0	0	0	0	0	0	0	0	0	0	0	0	0	0	0	0	0
657318	GCA_000209935.1_ASM20993v1_genomic.fna.gz	[Eubacterium] rectale DSM 17629	strain=DSM 17629	3344951	0	0	0	0	0	0	0	0	0	0	0	0	0	0	0	0	0	0	0	0	0.000647012	0.000647012	0.000647012	0.000647012	0.000647012	0	0	0	0	0	0	0	0	0	0	0	0	0	0	0	0	0	0	0	0
657319	GCA_000209915.1_ASM20991v1_genomic.fna.gz	[Eubacterium] siraeum 70/3	strain=70/3	2943413	0	0	0	0	0	0	0	0	0	0	0.00107438	0.00107438	0.00107438	0.00107438	0.00107438	0.000945898	0.000945898	0.000945898	0.000945898	0.000945898	0.000848592	0.000848592	0.000848592	0.000848592	0.000848592	0	0	0	0	0	0	0	0	0	0	0.000866589	0.000866589	0.000866589	0.000866589	0.000866589	0.000777548	0.000777548	0.000777548	0.000777548	0.000777548
657321	GCA_000209875.1_ASM20987v1_genomic.fna.gz	Ruminococcus bromii L2-63	strain=L2-63	2249085	0	0	0	0	0	0.0141433	0.0141433	0.0141433	0.0141433	0.0141433	0.0123176	0.0123176	0.0123176	0.0123176	0.0123176	0.0108445	0.0108445	0.0108445	0.0108445	0.0108445	0.00972894	0.00972894	0.00972894	0.00972894	0.00972894	0	0	0	0	0	0.0221433	0.0221433	0.0221433	0.0221433	0.0221433	0.0194998	0.0194998	0.0194998	0.0194998	0.0194998	0.0174962	0.0174962	0.0174962	0.0174962	0.0174962
657322	GCA_000209855.1_ASM20985v1_genomic.fna.gz	Faecalibacterium prausnitzii SL3/3	strain=SL3/3	3214418	0.00624909	0.00624909	0.00624909	0.00624909	0.00624909	0.00376391	0.00376391	0.00376391	0.00376391	0.00376391	0.00327804	0.00327804	0.00327804	0.00327804	0.00327804	0.00288602	0.00288602	0.00288602	0.00288602	0.00288602	0.00258913	0.00258913	0.00258913	0.00258913	0.00258913	0.00772144	0.00772144	0.00772144	0.00772144	0.00772144	0.00411836	0.00411836	0.00411836	0.00411836	0.00411836	0.00362671	0.00362671	0.00362671	0.00362671	0.00362671	0.00325406	0.00325406	0.00325406	0.00325406	0.00325406
657323	GCA_000209835.1_ASM20983v1_genomic.fna.gz	Ruminococcus sp. SR1/5	strain=SR1/5	3545606	0	0	0	0	0	0.00778413	0.00778413	0.00778413	0.00778413	0.00778413	0.00677932	0.00677932	0.00677932	0.00677932	0.00677932	0.00596858	0.00596858	0.00596858	0.00596858	0.00596858	0.00535458	0.00535458	0.00535458	0.00535458	0.00535458	0	0	0	0	0	0.00855346	0.00855346	0.00855346	0.00855346	0.00855346	0.00753234	0.00753234	0.00753234	0.00753234	0.00753234	0.0067584	0.0067584	0.0067584	0.0067584	0.0067584
658081	GCA_000218445.1_Lach_bact_1_1_57FAA_V1_genomic.fna.gz	Lachnospiraceae bacterium 1_1_57FAA	strain=1_1_57FAA	2930016	0	0	0	0	0	0	0	0	0	0	0	0	0	0	0	0.000218951	0.000218951	0.000218951	0.000218951	0.000218951	0.000196427	0.000196427	0.000196427	0.000196427	0.000196427	0	0	0	0	0	0	0	0	0	0	0	0	0	0	0	0.000199447	0.000199447	0.000199447	0.000199447	0.000199447
658082	GCA_000218465.1_Lach_bact_2_1_58FAA_V1_genomic.fna.gz	Lachnospiraceae bacterium 2_1_58FAA	strain=2_1_58FAA	3460754	0	0	0	0	0	0	0	0	0	0	0	0	0	0	0	0	0	0	0	0	0	0	0	0	0	0	0	0	0	0	0	0	0	0	0	0	0	0	0	0	0	0	0	0	0
658083	GCA_000209425.1_Lach_bact_6_1_63FAA_V1_genomic.fna.gz	Lachnospiraceae bacterium 6_1_63FAA	strain=6_1_63FAA	2725565	0	0	0	0	0	0	0	0	0	0	0	0	0	0	0	0.00357972	0.00357972	0.00357972	0.00357972	0.00357972	0.00321147	0.00321147	0.00321147	0.00321147	0.00321147	0	0	0	0	0	0	0	0	0	0	0	0	0	0	0	0.0030353	0.0030353	0.0030353	0.0030353	0.0030353
658085	GCA_000218425.1_Lach_bact_5_1_57FAA_genomic.fna.gz	Lachnospiraceae bacterium 5_1_57FAA	strain=5_1_57FAA	3339557	0	0	0	0	0	0	0	0	0	0	0.00325787	0.00325787	0.00325787	0.00325787	0.00325787	0.00286826	0.00286826	0.00286826	0.00286826	0.00286826	0.0025732	0.0025732	0.0025732	0.0025732	0.0025732	0	0	0	0	0	0	0	0	0	0	0.00269395	0.00269395	0.00269395	0.00269395	0.00269395	0.00241715	0.00241715	0.00241715	0.00241715	0.00241715
658086	GCA_000218405.2_Lach_bact_3-1-57FAA_CT1_V1_genomic.fna.gz	Lachnospiraceae bacterium 3_1_57FAA_CT1	strain=3_1_57FAA_CT1	7712837	0	0	0	0	0	0.00517963	0.00517963	0.00517963	0.00517963	0.00517963	0.00451102	0.00451102	0.00451102	0.00451102	0.00451102	0.00397155	0.00397155	0.00397155	0.00397155	0.00397155	0.00356298	0.00356298	0.00356298	0.00356298	0.00356298	0	0	0	0	0	0.00450485	0.00450485	0.00450485	0.00450485	0.00450485	0.00396705	0.00396705	0.00396705	0.00396705	0.00396705	0.00355944	0.00355944	0.00355944	0.00355944	0.00355944
658088	GCA_000209445.1_Lach_bact_9_1_43BFAA_V1_genomic.fna.gz	Lachnospiraceae bacterium 9_1_43BFAA	strain=9_1_43BFAA	2844875	0.0104896	0.0104896	0.0104896	0.0104896	0.0104896	0.00631805	0.00631805	0.00631805	0.00631805	0.00631805	0.00550249	0.00550249	0.00550249	0.00550249	0.00550249	0.00484444	0.00484444	0.00484444	0.00484444	0.00484444	0.00434608	0.00434608	0.00434608	0.00434608	0.00434608	0.0117322	0.0117322	0.0117322	0.0117322	0.0117322	0.00625758	0.00625758	0.00625758	0.00625758	0.00625758	0.00551055	0.00551055	0.00551055	0.00551055	0.00551055	0.00494434	0.00494434	0.00494434	0.00494434	0.00494434
658089	GCA_000185525.1_ASM18552v1_genomic.fna.gz	Lachnospiraceae bacterium 5_1_63FAA	strain=5_1_63FAA	3041190	0.0160155	0.0160155	0.0160155	0.0160155	0.0160155	0.00964637	0.00964637	0.00964637	0.00964637	0.00964637	0.00840117	0.00840117	0.00840117	0.00840117	0.00840117	0.00739647	0.00739647	0.00739647	0.00739647	0.00739647	0.00663558	0.00663558	0.00663558	0.00663558	0.00663558	0.018835	0.018835	0.018835	0.018835	0.018835	0.010046	0.010046	0.010046	0.010046	0.010046	0.00884667	0.00884667	0.00884667	0.00884667	0.00884667	0.00793768	0.00793768	0.00793768	0.00793768	0.00793768
658655	GCA_000218385.1_Lach_bact_1_4_56FAA_V1_genomic.fna.gz	Lachnospiraceae bacterium 1_4_56FAA	strain=1_4_56FAA	3233902	0	0	0	0	0	0	0	0	0	0	0	0	0	0	0	0	0	0	0	0	0	0	0	0	0	0	0	0	0	0	0	0	0	0	0	0	0	0	0	0	0	0	0	0	0
658659	GCA_000165065.1_ASM16506v1_genomic.fna.gz	Erysipelotrichaceae bacterium 3_1_53	strain=3_1_53	4486197	0	0	0	0	0	0	0	0	0	0	0	0	0	0	0	0.00116343	0.00116343	0.00116343	0.00116343	0.00116343	0.00104375	0.00104375	0.00104375	0.00104375	0.00104375	0	0	0	0	0	0	0	0	0	0	0	0	0	0	0	0.000993371	0.000993371	0.000993371	0.000993371	0.000993371
665937	GCA_000185825.1_ASM18582v1_genomic.fna.gz	Anaerostipes sp. 3_2_56FAA	strain=3_2_56FAA	3286322	0	0	0	0	0	0	0	0	0	0	0	0	0	0	0	0	0	0	0	0	0.000196427	0.000196427	0.000196427	0.000196427	0.000196427	0	0	0	0	0	0	0	0	0	0	0	0	0	0	0	0	0	0	0	0
665938	GCA_000218345.1_Bacteroides_sp_2_1_56FAA_V1_genomic.fna.gz	Bacteroides sp. 2_1_56FAA	strain=2_1_56FAA	5648441	0	0	0	0	0	0	0	0	0	0	0	0	0	0	0	0.000602446	0.000602446	0.000602446	0.000602446	0.000602446	0.000540471	0.000540471	0.000540471	0.000540471	0.000540471	0	0	0	0	0	0	0	0	0	0	0	0	0	0	0	0.00051026	0.00051026	0.00051026	0.00051026	0.00051026
665943	GCA_000185625.1_ASM18562v1_genomic.fna.gz	Eggerthella sp. 1_3_56FAA	strain=1_3_56FAA	3453272	0	0	0	0	0	0	0	0	0	0	0	0	0	0	0	0	0	0	0	0	0	0	0	0	0	0	0	0	0	0	0	0	0	0	0	0	0	0	0	0	0	0	0	0	0
665950	GCA_000209405.1_Lach_bact_3_1_46FAA_V1_genomic.fna.gz	Lachnospiraceae bacterium 3_1_46FAA	strain=3_1_46FAA	3118216	0	0	0	0	0	0	0	0	0	0	0	0	0	0	0	0	0	0	0	0	0.000196427	0.000196427	0.000196427	0.000196427	0.000196427	0	0	0	0	0	0	0	0	0	0	0	0	0	0	0	0	0	0	0	0
665951	GCA_000185545.1_ASM18554v1_genomic.fna.gz	Lachnospiraceae bacterium 8_1_57FAA	strain=8_1_57FAA	2927350	0	0	0	0	0	0	0	0	0	0	0	0	0	0	0	0	0	0	0	0	0.000196427	0.000196427	0.000196427	0.000196427	0.000196427	0	0	0	0	0	0	0	0	0	0	0	0	0	0	0	0	0	0	0	0
665953	GCA_000185605.1_ASM18560v1_genomic.fna.gz	Bacteroides eggerthii 1_2_48FAA	strain=1_2_48FAA	4586481	0.00934973	0.00934973	0.00934973	0.00934973	0.00934973	0.00563147	0.00563147	0.00563147	0.00563147	0.00563147	0.00490453	0.00490453	0.00490453	0.00490453	0.00490453	0.004318	0.004318	0.004318	0.004318	0.004318	0.00387379	0.00387379	0.00387379	0.00387379	0.00387379	0.0112525	0.0112525	0.0112525	0.0112525	0.0112525	0.00600169	0.00600169	0.00600169	0.00600169	0.00600169	0.0052852	0.0052852	0.0052852	0.0052852	0.0052852	0.00474215	0.00474215	0.00474215	0.00474215	0.00474215
665954	GCA_000218325.1_Bact_ovat_3_8_47FAA_V1_genomic.fna.gz	Bacteroides ovatus 3_8_47FAA	strain=3_8_47FAA	6549476	0.015648	0.015648	0.015648	0.015648	0.015648	0.00942501	0.00942501	0.00942501	0.00942501	0.00942501	0.00820839	0.00820839	0.00820839	0.00820839	0.00820839	0.00722674	0.00722674	0.00722674	0.00722674	0.00722674	0.00648331	0.00648331	0.00648331	0.00648331	0.00648331	0.0236233	0.0236233	0.0236233	0.0236233	0.0236233	0.0125999	0.0125999	0.0125999	0.0125999	0.0125999	0.0110957	0.0110957	0.0110957	0.0110957	0.0110957	0.00995563	0.00995563	0.00995563	0.00995563	0.00995563
667015	GCA_000190575.1_ASM19057v1_genomic.fna.gz	Bacteroides salanitronis DSM 18170	strain=DSM 18170	4308663	0	0	0	0	0	0	0	0	0	0	0	0	0	0	0	0	0	0	0	0	0.00169701	0.00169701	0.00169701	0.00169701	0.00169701	0	0	0	0	0	0	0	0	0	0	0	0	0	0	0	0	0	0	0	0
667127	GCA_000163455.1_ASM16345v1_genomic.fna.gz	Klebsiella pneumoniae subsp. rhinoscleromatis ATCC 13884	strain=ATCC 13884	5450034	0	0	0	0	0	0.000901755	0.000901755	0.000901755	0.000901755	0.000901755	0.000785352	0.000785352	0.000785352	0.000785352	0.000785352	0.000691431	0.000691431	0.000691431	0.000691431	0.000691431	0.000620302	0.000620302	0.000620302	0.000620302	0.000620302	0	0	0	0	0	0.000824654	0.000824654	0.000824654	0.000824654	0.000824654	0.000726206	0.000726206	0.000726206	0.000726206	0.000726206	0.000651589	0.000651589	0.000651589	0.000651589	0.000651589
670888	GCA_000165655.2_ASM16565v1_genomic.fna.gz	Escherichia coli 1827-70	strain=1827-70	4803089	0	0	0	0	0	4.4286e-05	4.4286e-05	4.4286e-05	4.4286e-05	4.4286e-05	3.85694e-05	3.85694e-05	3.85694e-05	3.85694e-05	3.85694e-05	3.39568e-05	3.39568e-05	3.39568e-05	3.39568e-05	3.39568e-05	3.04636e-05	3.04636e-05	3.04636e-05	3.04636e-05	3.04636e-05	0	0	0	0	0	4.02611e-05	4.02611e-05	4.02611e-05	4.02611e-05	4.02611e-05	3.54547e-05	3.54547e-05	3.54547e-05	3.54547e-05	3.54547e-05	3.18117e-05	3.18117e-05	3.18117e-05	3.18117e-05	3.18117e-05
670890	GCA_000188815.2_ASM18881v2_genomic.fna.gz	Escherichia coli LT-68	strain=LT-68	5189427	0	0	0	0	0	4.4286e-05	4.4286e-05	4.4286e-05	4.4286e-05	4.4286e-05	3.85694e-05	3.85694e-05	3.85694e-05	3.85694e-05	3.85694e-05	3.39568e-05	3.39568e-05	3.39568e-05	3.39568e-05	3.39568e-05	3.04636e-05	3.04636e-05	3.04636e-05	3.04636e-05	3.04636e-05	0	0	0	0	0	4.02611e-05	4.02611e-05	4.02611e-05	4.02611e-05	4.02611e-05	3.54547e-05	3.54547e-05	3.54547e-05	3.54547e-05	3.54547e-05	3.18117e-05	3.18117e-05	3.18117e-05	3.18117e-05	3.18117e-05
670892	GCA_000184765.2_ASM18476v2_genomic.fna.gz	Escherichia coli 3431	strain=3431	5223419	0	0	0	0	0	0	0	0	0	0	3.85694e-05	3.85694e-05	3.85694e-05	3.85694e-05	3.85694e-05	3.39568e-05	3.39568e-05	3.39568e-05	3.39568e-05	3.39568e-05	3.04636e-05	3.04636e-05	3.04636e-05	3.04636e-05	3.04636e-05	0	0	0	0	0	0	0	0	0	0	3.54547e-05	3.54547e-05	3.54547e-05	3.54547e-05	3.54547e-05	3.18117e-05	3.18117e-05	3.18117e-05	3.18117e-05	3.18117e-05
670893	GCA_000188755.2_ASM18875v2_genomic.fna.gz	Escherichia coli EPECa14	strain=EPECa14	5435297	0	0	0	0	0	0	0	0	0	0	3.85694e-05	3.85694e-05	3.85694e-05	3.85694e-05	3.85694e-05	3.39568e-05	3.39568e-05	3.39568e-05	3.39568e-05	3.39568e-05	3.04636e-05	3.04636e-05	3.04636e-05	3.04636e-05	3.04636e-05	0	0	0	0	0	0	0	0	0	0	3.54547e-05	3.54547e-05	3.54547e-05	3.54547e-05	3.54547e-05	3.18117e-05	3.18117e-05	3.18117e-05	3.18117e-05	3.18117e-05
670894	GCA_000188775.2_ASM18877v2_genomic.fna.gz	Escherichia coli E128010	strain=E128010	5221267	0	0	0	0	0	4.4286e-05	4.4286e-05	4.4286e-05	4.4286e-05	4.4286e-05	3.85694e-05	3.85694e-05	3.85694e-05	3.85694e-05	3.85694e-05	3.39568e-05	3.39568e-05	3.39568e-05	3.39568e-05	3.39568e-05	3.04636e-05	3.04636e-05	3.04636e-05	3.04636e-05	3.04636e-05	0	0	0	0	0	4.02611e-05	4.02611e-05	4.02611e-05	4.02611e-05	4.02611e-05	3.54547e-05	3.54547e-05	3.54547e-05	3.54547e-05	3.54547e-05	3.18117e-05	3.18117e-05	3.18117e-05	3.18117e-05	3.18117e-05
670897	GCA_000183005.2_ASM18300v1_genomic.fna.gz	Escherichia coli 2362-75	strain=2362-75	5173444	0	0	0	0	0	0	0	0	0	0	3.85694e-05	3.85694e-05	3.85694e-05	3.85694e-05	3.85694e-05	3.39568e-05	3.39568e-05	3.39568e-05	3.39568e-05	3.39568e-05	3.04636e-05	3.04636e-05	3.04636e-05	3.04636e-05	3.04636e-05	0	0	0	0	0	0	0	0	0	0	3.54547e-05	3.54547e-05	3.54547e-05	3.54547e-05	3.54547e-05	3.18117e-05	3.18117e-05	3.18117e-05	3.18117e-05	3.18117e-05
670899	GCA_000188875.2_ASM18887v2_genomic.fna.gz	Escherichia coli RN587/1	strain=RN587/1	5061577	0	0	0	0	0	0	0	0	0	0	0	0	0	0	0	3.39568e-05	3.39568e-05	3.39568e-05	3.39568e-05	3.39568e-05	3.04636e-05	3.04636e-05	3.04636e-05	3.04636e-05	3.04636e-05	0	0	0	0	0	0	0	0	0	0	0	0	0	0	0	3.18117e-05	3.18117e-05	3.18117e-05	3.18117e-05	3.18117e-05
670904	GCA_000188835.2_ASM18883v2_genomic.fna.gz	Escherichia coli OK1180	strain=OK1180	5554557	0	0	0	0	0	0	0	0	0	0	3.85694e-05	3.85694e-05	3.85694e-05	3.85694e-05	3.85694e-05	3.39568e-05	3.39568e-05	3.39568e-05	3.39568e-05	3.39568e-05	3.04636e-05	3.04636e-05	3.04636e-05	3.04636e-05	3.04636e-05	0	0	0	0	0	0	0	0	0	0	3.54547e-05	3.54547e-05	3.54547e-05	3.54547e-05	3.54547e-05	3.18117e-05	3.18117e-05	3.18117e-05	3.18117e-05	3.18117e-05
670905	GCA_000188855.2_ASM18885v2_genomic.fna.gz	Escherichia coli OK1357	strain=OK1357	5277070	0	0	0	0	0	4.4286e-05	4.4286e-05	4.4286e-05	4.4286e-05	4.4286e-05	3.85694e-05	3.85694e-05	3.85694e-05	3.85694e-05	3.85694e-05	3.39568e-05	3.39568e-05	3.39568e-05	3.39568e-05	3.39568e-05	3.04636e-05	3.04636e-05	3.04636e-05	3.04636e-05	3.04636e-05	0	0	0	0	0	4.02611e-05	4.02611e-05	4.02611e-05	4.02611e-05	4.02611e-05	3.54547e-05	3.54547e-05	3.54547e-05	3.54547e-05	3.54547e-05	3.18117e-05	3.18117e-05	3.18117e-05	3.18117e-05	3.18117e-05
679188	GCA_000177575.1_ASM17757v1_genomic.fna.gz	Lactobacillus crispatus 214-1	strain=214-1	2068805	0	0	0	0	0	0	0	0	0	0	0	0	0	0	0	0	0	0	0	0	0	0	0	0	0	0	0	0	0	0	0	0	0	0	0	0	0	0	0	0	0	0	0	0	0
679189	GCA_000177055.1_ASM17705v1_genomic.fna.gz	Prevotella timonensis CRIS 5C-B1	strain=CRIS 5C-B1	2796067	0	0	0	0	0	0	0	0	0	0	0	0	0	0	0	0	0	0	0	0	0.000569829	0.000569829	0.000569829	0.000569829	0.000569829	0	0	0	0	0	0	0	0	0	0	0	0	0	0	0	0	0	0	0	0
679196	GCA_000177415.1_ASM17741v1_genomic.fna.gz	Lactobacillus gasseri 224-1	strain=224-1	2005522	0	0	0	0	0	0	0	0	0	0	0.00071807	0.00071807	0.00071807	0.00071807	0.00071807	0.000632196	0.000632196	0.000632196	0.000632196	0.000632196	0.000567161	0.000567161	0.000567161	0.000567161	0.000567161	0	0	0	0	0	0	0	0	0	0	0.000603819	0.000603819	0.000603819	0.000603819	0.000603819	0.000541777	0.000541777	0.000541777	0.000541777	0.000541777
679202	GCA_000179075.1_ASM17907v1_genomic.fna.gz	Escherichia coli MS 85-1	strain=MS 85-1	5457657	7.35266e-05	7.35266e-05	7.35266e-05	7.35266e-05	7.35266e-05	4.4286e-05	4.4286e-05	4.4286e-05	4.4286e-05	4.4286e-05	3.85694e-05	3.85694e-05	3.85694e-05	3.85694e-05	3.85694e-05	3.39568e-05	3.39568e-05	3.39568e-05	3.39568e-05	3.39568e-05	3.04636e-05	3.04636e-05	3.04636e-05	3.04636e-05	3.04636e-05	7.54848e-05	7.54848e-05	7.54848e-05	7.54848e-05	7.54848e-05	4.02611e-05	4.02611e-05	4.02611e-05	4.02611e-05	4.02611e-05	3.54547e-05	3.54547e-05	3.54547e-05	3.54547e-05	3.54547e-05	3.18117e-05	3.18117e-05	3.18117e-05	3.18117e-05	3.18117e-05
679204	GCA_000179115.1_ASM17911v1_genomic.fna.gz	Escherichia coli MS 145-7	strain=MS 145-7	5115051	0	0	0	0	0	0	0	0	0	0	3.85694e-05	3.85694e-05	3.85694e-05	3.85694e-05	3.85694e-05	3.39568e-05	3.39568e-05	3.39568e-05	3.39568e-05	3.39568e-05	3.04636e-05	3.04636e-05	3.04636e-05	3.04636e-05	3.04636e-05	0	0	0	0	0	0	0	0	0	0	3.54547e-05	3.54547e-05	3.54547e-05	3.54547e-05	3.54547e-05	3.18117e-05	3.18117e-05	3.18117e-05	3.18117e-05	3.18117e-05
679205	GCA_000179135.1_ASM17913v1_genomic.fna.gz	Escherichia coli MS 124-1	strain=MS 124-1	5394127	0	0	0	0	0	0	0	0	0	0	3.85694e-05	3.85694e-05	3.85694e-05	3.85694e-05	3.85694e-05	3.39568e-05	3.39568e-05	3.39568e-05	3.39568e-05	3.39568e-05	3.04636e-05	3.04636e-05	3.04636e-05	3.04636e-05	3.04636e-05	0	0	0	0	0	0	0	0	0	0	3.54547e-05	3.54547e-05	3.54547e-05	3.54547e-05	3.54547e-05	3.18117e-05	3.18117e-05	3.18117e-05	3.18117e-05	3.18117e-05
679206	GCA_000179155.1_ASM17915v1_genomic.fna.gz	Escherichia coli MS 119-7	strain=MS 119-7	4968686	0	0	0	0	0	0	0	0	0	0	3.85694e-05	3.85694e-05	3.85694e-05	3.85694e-05	3.85694e-05	3.39568e-05	3.39568e-05	3.39568e-05	3.39568e-05	3.39568e-05	3.04636e-05	3.04636e-05	3.04636e-05	3.04636e-05	3.04636e-05	0	0	0	0	0	0	0	0	0	0	3.54547e-05	3.54547e-05	3.54547e-05	3.54547e-05	3.54547e-05	3.18117e-05	3.18117e-05	3.18117e-05	3.18117e-05	3.18117e-05
679207	GCA_000179175.1_ASM17917v1_genomic.fna.gz	Escherichia coli MS 107-1	strain=MS 107-1	4905150	7.35266e-05	7.35266e-05	7.35266e-05	7.35266e-05	7.35266e-05	4.4286e-05	4.4286e-05	4.4286e-05	4.4286e-05	4.4286e-05	3.85694e-05	3.85694e-05	3.85694e-05	3.85694e-05	3.85694e-05	3.39568e-05	3.39568e-05	3.39568e-05	3.39568e-05	3.39568e-05	3.04636e-05	3.04636e-05	3.04636e-05	3.04636e-05	3.04636e-05	7.54848e-05	7.54848e-05	7.54848e-05	7.54848e-05	7.54848e-05	4.02611e-05	4.02611e-05	4.02611e-05	4.02611e-05	4.02611e-05	3.54547e-05	3.54547e-05	3.54547e-05	3.54547e-05	3.54547e-05	3.18117e-05	3.18117e-05	3.18117e-05	3.18117e-05	3.18117e-05
684738	GCA_000025045.1_ASM2504v1_genomic.fna.gz	Lactococcus lactis subsp. lactis KF147	strain=KF147	2635654	0	0	0	0	0	0	0	0	0	0	0	0	0	0	0	0	0	0	0	0	0.000856136	0.000856136	0.000856136	0.000856136	0.000856136	0	0	0	0	0	0	0	0	0	0	0	0	0	0	0	0	0	0	0	0
685038	GCA_000183345.1_ASM18334v1_genomic.fna.gz	Escherichia coli O83:H1 str. NRG 857C	strain=NRG 857C	4894879	0	0	0	0	0	0	0	0	0	0	3.85694e-05	3.85694e-05	3.85694e-05	3.85694e-05	3.85694e-05	3.39568e-05	3.39568e-05	3.39568e-05	3.39568e-05	3.39568e-05	3.04636e-05	3.04636e-05	3.04636e-05	3.04636e-05	3.04636e-05	0	0	0	0	0	0	0	0	0	0	3.54547e-05	3.54547e-05	3.54547e-05	3.54547e-05	3.54547e-05	3.18117e-05	3.18117e-05	3.18117e-05	3.18117e-05	3.18117e-05
686660	GCA_000177435.1_ASM17743v1_genomic.fna.gz	Veillonella parvula ATCC 17745	strain=ATCC 17745	2163473	0	0	0	0	0	0	0	0	0	0	0.00172617	0.00172617	0.00172617	0.00172617	0.00172617	0.00151973	0.00151973	0.00151973	0.00151973	0.00151973	0.0013634	0.0013634	0.0013634	0.0013634	0.0013634	0	0	0	0	0	0	0	0	0	0	0.00139334	0.00139334	0.00139334	0.00139334	0.00139334	0.00125018	0.00125018	0.00125018	0.00125018	0.00125018
695560	GCA_000182855.2_ASM18285v1_genomic.fna.gz	Lactobacillus amylovorus GRL 1112	strain=GRL 1112	2126674	0	0	0	0	0	0	0	0	0	0	0	0	0	0	0	0.0010552	0.0010552	0.0010552	0.0010552	0.0010552	0.000946646	0.000946646	0.000946646	0.000946646	0.000946646	0	0	0	0	0	0	0	0	0	0	0	0	0	0	0	0.000931831	0.000931831	0.000931831	0.000931831	0.000931831
695562	GCA_000194115.1_ASM19411v1_genomic.fna.gz	Lactobacillus amylovorus GRL1118	strain=GRL1118	1977087	0	0	0	0	0	0	0	0	0	0	0	0	0	0	0	0	0	0	0	0	0	0	0	0	0	0	0	0	0	0	0	0	0	0	0	0	0	0	0	0	0	0	0	0	0
696406	GCA_000212715.2_ASM21271v2_genomic.fna.gz	Escherichia coli UMNK88	strain=UMNK88	5666764	0	0	0	0	0	4.4286e-05	4.4286e-05	4.4286e-05	4.4286e-05	4.4286e-05	3.85694e-05	3.85694e-05	3.85694e-05	3.85694e-05	3.85694e-05	3.39568e-05	3.39568e-05	3.39568e-05	3.39568e-05	3.39568e-05	3.04636e-05	3.04636e-05	3.04636e-05	3.04636e-05	3.04636e-05	0	0	0	0	0	4.02611e-05	4.02611e-05	4.02611e-05	4.02611e-05	4.02611e-05	3.54547e-05	3.54547e-05	3.54547e-05	3.54547e-05	3.54547e-05	3.18117e-05	3.18117e-05	3.18117e-05	3.18117e-05	3.18117e-05
701177	GCA_000025165.1_ASM2516v1_genomic.fna.gz	Escherichia coli O55:H7 str. CB9615	strain=CB9615	5452353	0	0	0	0	0	0	0	0	0	0	0	0	0	0	0	3.39568e-05	3.39568e-05	3.39568e-05	3.39568e-05	3.39568e-05	3.04636e-05	3.04636e-05	3.04636e-05	3.04636e-05	3.04636e-05	0	0	0	0	0	0	0	0	0	0	0	0	0	0	0	3.18117e-05	3.18117e-05	3.18117e-05	3.18117e-05	3.18117e-05
702443	GCA_000178275.1_ASM17827v1_genomic.fna.gz	Bacteroides ovatus SD CMC 3f	strain=SD CMC 3f	6775279	0.015648	0.015648	0.015648	0.015648	0.015648	0.00942501	0.00942501	0.00942501	0.00942501	0.00942501	0.00820839	0.00820839	0.00820839	0.00820839	0.00820839	0.00722674	0.00722674	0.00722674	0.00722674	0.00722674	0.00648331	0.00648331	0.00648331	0.00648331	0.00648331	0.0236233	0.0236233	0.0236233	0.0236233	0.0236233	0.0125999	0.0125999	0.0125999	0.0125999	0.0125999	0.0110957	0.0110957	0.0110957	0.0110957	0.0110957	0.00995563	0.00995563	0.00995563	0.00995563	0.00995563
702446	GCA_000178195.1_ASM17819v1_genomic.fna.gz	Bacteroides vulgatus PC510	strain=PC510	4781702	0.0856801	0.0856801	0.0856801	0.0856801	0.0856801	0.0516062	0.0516062	0.0516062	0.0516062	0.0516062	0.0449447	0.0449447	0.0449447	0.0449447	0.0449447	0.0395697	0.0395697	0.0395697	0.0395697	0.0395697	0.0354991	0.0354991	0.0354991	0.0354991	0.0354991	0.0633155	0.0633155	0.0633155	0.0633155	0.0633155	0.0337704	0.0337704	0.0337704	0.0337704	0.0337704	0.0297388	0.0297388	0.0297388	0.0297388	0.0297388	0.0266832	0.0266832	0.0266832	0.0266832	0.0266832
702447	GCA_000178215.1_ASM17821v1_genomic.fna.gz	Bacteroides xylanisolvens SD CC 1b	strain=SD CC 1b	6059812	0.0345451	0.0345451	0.0345451	0.0345451	0.0345451	0.020807	0.020807	0.020807	0.020807	0.020807	0.0181211	0.0181211	0.0181211	0.0181211	0.0181211	0.015954	0.015954	0.015954	0.015954	0.015954	0.0143128	0.0143128	0.0143128	0.0143128	0.0143128	0.0358525	0.0358525	0.0358525	0.0358525	0.0358525	0.0191225	0.0191225	0.0191225	0.0191225	0.0191225	0.0168397	0.0168397	0.0168397	0.0168397	0.0168397	0.0151094	0.0151094	0.0151094	0.0151094	0.0151094
702450	GCA_000178255.1_ASM17825v1_genomic.fna.gz	Turicibacter sanguinis PC909	strain=PC909	2953411	0	0	0	0	0	0	0	0	0	0	0	0	0	0	0	0.00122879	0.00122879	0.00122879	0.00122879	0.00122879	0.00110238	0.00110238	0.00110238	0.00110238	0.00110238	0	0	0	0	0	0	0	0	0	0	0	0	0	0	0	0.00103894	0.00103894	0.00103894	0.00103894	0.00103894
702459	GCA_000165905.1_ASM16590v1_genomic.fna.gz	Bifidobacterium bifidum PRL2010	strain=PRL2010	2214656	0	0	0	0	0	0	0	0	0	0	0.00121829	0.00121829	0.00121829	0.00121829	0.00121829	0.00107259	0.00107259	0.00107259	0.00107259	0.00107259	0.000962254	0.000962254	0.000962254	0.000962254	0.000962254	0	0	0	0	0	0	0	0	0	0	0.00101023	0.00101023	0.00101023	0.00101023	0.00101023	0.000906427	0.000906427	0.000906427	0.000906427	0.000906427
706433	GCA_000186945.2_ASM18694v2_genomic.fna.gz	Solobacterium moorei F0204	strain=F0204	2008072	0	0	0	0	0	0	0	0	0	0	0	0	0	0	0	0	0	0	0	0	0.00199479	0.00199479	0.00199479	0.00199479	0.00199479	0	0	0	0	0	0	0	0	0	0	0	0	0	0	0	0	0	0	0	0
706434	GCA_000165735.1_ASM16573v1_genomic.fna.gz	Megasphaera micronuciformis F0359	strain=F0359	1765528	0	0	0	0	0	0	0	0	0	0	0.00354771	0.00354771	0.00354771	0.00354771	0.00354771	0.00312344	0.00312344	0.00312344	0.00312344	0.00312344	0.00280212	0.00280212	0.00280212	0.00280212	0.00280212	0	0	0	0	0	0	0	0	0	0	0.00293274	0.00293274	0.00293274	0.00293274	0.00293274	0.00263141	0.00263141	0.00263141	0.00263141	0.00263141
706437	GCA_000184365.2_ASM18436v1_genomic.fna.gz	Streptococcus anginosus F0211	strain=F0211	1993709	0	0	0	0	0	0	0	0	0	0	0.00147584	0.00147584	0.00147584	0.00147584	0.00147584	0.00129934	0.00129934	0.00129934	0.00129934	0.00129934	0.00116568	0.00116568	0.00116568	0.00116568	0.00116568	0	0	0	0	0	0	0	0	0	0	0.0012482	0.0012482	0.0012482	0.0012482	0.0012482	0.00111995	0.00111995	0.00111995	0.00111995	0.00111995
709991	GCA_000190535.1_ASM19053v1_genomic.fna.gz	Odoribacter splanchnicus DSM 20712	strain=DSM 220712	4392288	0.0181506	0.0181506	0.0181506	0.0181506	0.0181506	0.0109323	0.0109323	0.0109323	0.0109323	0.0109323	0.00952113	0.00952113	0.00952113	0.00952113	0.00952113	0.0083825	0.0083825	0.0083825	0.0083825	0.0083825	0.00752017	0.00752017	0.00752017	0.00752017	0.00752017	0.0212438	0.0212438	0.0212438	0.0212438	0.0212438	0.0113307	0.0113307	0.0113307	0.0113307	0.0113307	0.00997805	0.00997805	0.00997805	0.00997805	0.00997805	0.00895281	0.00895281	0.00895281	0.00895281	0.00895281
712938	GCA_000210515.1_ASM21051v1_genomic.fna.gz	Lactobacillus fermentum CECT 5716	strain=CECT 5716	2100449	0	0	0	0	0	0	0	0	0	0	0	0	0	0	0	0	0	0	0	0	0	0	0	0	0	0	0	0	0	0	0	0	0	0	0	0	0	0	0	0	0	0	0	0	0
712961	GCA_000143435.1_ASM14343v1_genomic.fna.gz	Lactobacillus salivarius CECT 5713	strain=CECT 5713	2136138	0	0	0	0	0	0	0	0	0	0	0	0	0	0	0	0	0	0	0	0	0.000737552	0.000737552	0.000737552	0.000737552	0.000737552	0	0	0	0	0	0	0	0	0	0	0	0	0	0	0	0	0	0	0	0
714962	GCA_000025745.1_ASM2574v1_genomic.fna.gz	Escherichia coli IHE3034	strain=IHE3034	5108383	0	0	0	0	0	0	0	0	0	0	0	0	0	0	0	3.39568e-05	3.39568e-05	3.39568e-05	3.39568e-05	3.39568e-05	3.04636e-05	3.04636e-05	3.04636e-05	3.04636e-05	3.04636e-05	0	0	0	0	0	0	0	0	0	0	0	0	0	0	0	3.18117e-05	3.18117e-05	3.18117e-05	3.18117e-05	3.18117e-05
716541	GCA_000025565.1_ASM2556v1_genomic.fna.gz	Enterobacter cloacae subsp. cloacae ATCC 13047	strain=ATCC 13047	5598796	0	0	0	0	0	0	0	0	0	0	0	0	0	0	0	0	0	0	0	0	0.00102647	0.00102647	0.00102647	0.00102647	0.00102647	0	0	0	0	0	0	0	0	0	0	0	0	0	0	0	0	0	0	0	0
717608	GCA_000210535.1_ASM21053v1_genomic.fna.gz	[Clostridium] cf. saccharolyticum K10	strain=K10	3769775	0	0	0	0	0	0	0	0	0	0	0.00558982	0.00558982	0.00558982	0.00558982	0.00558982	0.00492134	0.00492134	0.00492134	0.00492134	0.00492134	0.00441507	0.00441507	0.00441507	0.00441507	0.00441507	0	0	0	0	0	0	0	0	0	0	0.00559973	0.00559973	0.00559973	0.00559973	0.00559973	0.00502436	0.00502436	0.00502436	0.00502436	0.00502436
717959	GCA_000210575.1_ASM21057v1_genomic.fna.gz	Alistipes shahii WAL 8301	strain=WAL 8301	3763317	0	0	0	0	0	0	0	0	0	0	0.00541094	0.00541094	0.00541094	0.00541094	0.00541094	0.00476384	0.00476384	0.00476384	0.00476384	0.00476384	0.00427377	0.00427377	0.00427377	0.00427377	0.00427377	0	0	0	0	0	0	0	0	0	0	0.00539447	0.00539447	0.00539447	0.00539447	0.00539447	0.00484019	0.00484019	0.00484019	0.00484019	0.00484019
717961	GCA_000210635.1_ASM21063v1_genomic.fna.gz	[Eubacterium] siraeum V10Sc8a	strain=V10Sc8a	2836123	0	0	0	0	0	0	0	0	0	0	0.00107438	0.00107438	0.00107438	0.00107438	0.00107438	0.000945898	0.000945898	0.000945898	0.000945898	0.000945898	0.000848592	0.000848592	0.000848592	0.000848592	0.000848592	0	0	0	0	0	0	0	0	0	0	0.000866589	0.000866589	0.000866589	0.000866589	0.000866589	0.000777548	0.000777548	0.000777548	0.000777548	0.000777548
717962	GCA_000210555.1_ASM21055v1_genomic.fna.gz	Coprococcus catus GD/7	strain=GD/7	3522704	0	0	0	0	0	0	0	0	0	0	0	0	0	0	0	0.00398895	0.00398895	0.00398895	0.00398895	0.00398895	0.0035786	0.0035786	0.0035786	0.0035786	0.0035786	0	0	0	0	0	0	0	0	0	0	0	0	0	0	0	0.00359153	0.00359153	0.00359153	0.00359153	0.00359153
718252	GCA_000210735.1_ASM21073v1_genomic.fna.gz	Faecalibacterium prausnitzii L2-6	strain=L2/6	3321367	0	0	0	0	0	0.00801802	0.00801802	0.00801802	0.00801802	0.00801802	0.00698301	0.00698301	0.00698301	0.00698301	0.00698301	0.00614791	0.00614791	0.00614791	0.00614791	0.00614791	0.00551546	0.00551546	0.00551546	0.00551546	0.00551546	0	0	0	0	0	0.00886128	0.00886128	0.00886128	0.00886128	0.00886128	0.00780342	0.00780342	0.00780342	0.00780342	0.00780342	0.00700162	0.00700162	0.00700162	0.00700162	0.00700162
718254	GCA_000210775.1_ASM21077v1_genomic.fna.gz	Enterobacter cloacae subsp. cloacae NCTC 9394	strain=NCTC 9394	4908759	0	0	0	0	0	0	0	0	0	0	0	0	0	0	0	0.00114417	0.00114417	0.00114417	0.00114417	0.00114417	0.00102647	0.00102647	0.00102647	0.00102647	0.00102647	0	0	0	0	0	0	0	0	0	0	0	0	0	0	0	0.000979543	0.000979543	0.000979543	0.000979543	0.000979543
718255	GCA_000210655.1_ASM21065v1_genomic.fna.gz	Roseburia intestinalis XB6B4	strain=XB6B4	4286292	0.0100014	0.0100014	0.0100014	0.0100014	0.0100014	0.00602397	0.00602397	0.00602397	0.00602397	0.00602397	0.00524637	0.00524637	0.00524637	0.00524637	0.00524637	0.00461895	0.00461895	0.00461895	0.00461895	0.00461895	0.00414379	0.00414379	0.00414379	0.00414379	0.00414379	0.0153074	0.0153074	0.0153074	0.0153074	0.0153074	0.00816445	0.00816445	0.00816445	0.00816445	0.00816445	0.00718977	0.00718977	0.00718977	0.00718977	0.00718977	0.00645102	0.00645102	0.00645102	0.00645102	0.00645102
722911	GCA_000210755.1_ASM21075v1_genomic.fna.gz	Bifidobacterium longum subsp. longum F8	strain=F8	2384987	0.00236102	0.00236102	0.00236102	0.00236102	0.00236102	0.00142207	0.00142207	0.00142207	0.00142207	0.00142207	0.0012385	0.0012385	0.0012385	0.0012385	0.0012385	0.00109039	0.00109039	0.00109039	0.00109039	0.00109039	0.000978221	0.000978221	0.000978221	0.000978221	0.000978221	0.0042463	0.0042463	0.0042463	0.0042463	0.0042463	0.00226483	0.00226483	0.00226483	0.00226483	0.00226483	0.00199446	0.00199446	0.00199446	0.00199446	0.00199446	0.00178953	0.00178953	0.00178953	0.00178953	0.00178953
742723	GCA_000209385.2_Lach_bact_2_1_46_FAA_V2_genomic.fna.gz	Lachnospiraceae bacterium 2_1_46FAA	strain=2_1_46FAA	2219029	0	0	0	0	0	0	0	0	0	0	0	0	0	0	0	0	0	0	0	0	0.00207531	0.00207531	0.00207531	0.00207531	0.00207531	0	0	0	0	0	0	0	0	0	0	0	0	0	0	0	0	0	0	0	0
742740	GCA_000189595.1_Clos_symb_WAL_14163_V1_genomic.fna.gz	[Clostridium] symbiosum WAL-14163	strain=WAL-14163	5352498	0.00471615	0.00471615	0.00471615	0.00471615	0.00471615	0.0028406	0.0028406	0.0028406	0.0028406	0.0028406	0.00247392	0.00247392	0.00247392	0.00247392	0.00247392	0.00217807	0.00217807	0.00217807	0.00217807	0.00217807	0.001954	0.001954	0.001954	0.001954	0.001954	0.00480921	0.00480921	0.00480921	0.00480921	0.00480921	0.00256507	0.00256507	0.00256507	0.00256507	0.00256507	0.00225885	0.00225885	0.00225885	0.00225885	0.00225885	0.00202675	0.00202675	0.00202675	0.00202675	0.00202675
742741	GCA_000189615.1_Clos_symb_WAL_14673_V2_genomic.fna.gz	[Clostridium] symbiosum WAL-14673	strain=WAL-14673	4916964	0	0	0	0	0	0.0028406	0.0028406	0.0028406	0.0028406	0.0028406	0.00247392	0.00247392	0.00247392	0.00247392	0.00247392	0.00217807	0.00217807	0.00217807	0.00217807	0.00217807	0.001954	0.001954	0.001954	0.001954	0.001954	0	0	0	0	0	0.00256507	0.00256507	0.00256507	0.00256507	0.00256507	0.00225885	0.00225885	0.00225885	0.00225885	0.00225885	0.00202675	0.00202675	0.00202675	0.00202675	0.00202675
742820	GCA_000186545.1_Strep_angi_1_2_62CV_V1_genomic.fna.gz	Streptococcus anginosus 1_2_62CV	strain=1_2_62CV	1821055	0	0	0	0	0	0	0	0	0	0	0.00147584	0.00147584	0.00147584	0.00147584	0.00147584	0.00129934	0.00129934	0.00129934	0.00129934	0.00129934	0.00116568	0.00116568	0.00116568	0.00116568	0.00116568	0	0	0	0	0	0	0	0	0	0	0.0012482	0.0012482	0.0012482	0.0012482	0.0012482	0.00111995	0.00111995	0.00111995	0.00111995	0.00111995
742821	GCA_000186505.1_Sutt_wads_3_1_45B_V1_genomic.fna.gz	Sutterella wadsworthensis 3_1_45B	strain=3_1_45B	2965437	0	0	0	0	0	0.00699831	0.00699831	0.00699831	0.00699831	0.00699831	0.00609494	0.00609494	0.00609494	0.00609494	0.00609494	0.00536604	0.00536604	0.00536604	0.00536604	0.00536604	0.00481403	0.00481403	0.00481403	0.00481403	0.00481403	0	0	0	0	0	0.00760407	0.00760407	0.00760407	0.00760407	0.00760407	0.00669629	0.00669629	0.00669629	0.00669629	0.00669629	0.00600825	0.00600825	0.00600825	0.00600825	0.00600825
746361	GCA_000143205.1_ASM14320v1_genomic.fna.gz	Lactococcus lactis subsp. cremoris NZ9000	strain=NZ9000	2530294	0	0	0	0	0	0	0	0	0	0	0	0	0	0	0	0	0	0	0	0	0.000721555	0.000721555	0.000721555	0.000721555	0.000721555	0	0	0	0	0	0	0	0	0	0	0	0	0	0	0	0	0	0	0	0
748224	GCA_000166035.1_ASM16603v1_genomic.fna.gz	Faecalibacterium cf. prausnitzii KLE1255	strain=KLE1255	2928734	0	0	0	0	0	0.00845671	0.00845671	0.00845671	0.00845671	0.00845671	0.00736508	0.00736508	0.00736508	0.00736508	0.00736508	0.00648429	0.00648429	0.00648429	0.00648429	0.00648429	0.00581723	0.00581723	0.00581723	0.00581723	0.00581723	0	0	0	0	0	0.00928276	0.00928276	0.00928276	0.00928276	0.00928276	0.00817458	0.00817458	0.00817458	0.00817458	0.00817458	0.00733464	0.00733464	0.00733464	0.00733464	0.00733464
748671	GCA_000091765.1_ASM9176v1_genomic.fna.gz	Lactobacillus crispatus ST1	strain=ST1	2043161	0	0	0	0	0	0	0	0	0	0	0	0	0	0	0	0	0	0	0	0	0	0	0	0	0	0	0	0	0	0	0	0	0	0	0	0	0	0	0	0	0	0	0	0	0
749529	GCA_000164615.1_ASM16461v1_genomic.fna.gz	Escherichia coli MS 57-2	strain=MS 57-2	4972736	0	0	0	0	0	0	0	0	0	0	0	0	0	0	0	3.39568e-05	3.39568e-05	3.39568e-05	3.39568e-05	3.39568e-05	3.04636e-05	3.04636e-05	3.04636e-05	3.04636e-05	3.04636e-05	0	0	0	0	0	0	0	0	0	0	0	0	0	0	0	3.18117e-05	3.18117e-05	3.18117e-05	3.18117e-05	3.18117e-05
749530	GCA_000164595.1_ASM16459v1_genomic.fna.gz	Escherichia coli MS 60-1	strain=MS 60-1	5228005	0	0	0	0	0	4.4286e-05	4.4286e-05	4.4286e-05	4.4286e-05	4.4286e-05	3.85694e-05	3.85694e-05	3.85694e-05	3.85694e-05	3.85694e-05	3.39568e-05	3.39568e-05	3.39568e-05	3.39568e-05	3.39568e-05	3.04636e-05	3.04636e-05	3.04636e-05	3.04636e-05	3.04636e-05	0	0	0	0	0	4.02611e-05	4.02611e-05	4.02611e-05	4.02611e-05	4.02611e-05	3.54547e-05	3.54547e-05	3.54547e-05	3.54547e-05	3.54547e-05	3.18117e-05	3.18117e-05	3.18117e-05	3.18117e-05	3.18117e-05
749536	GCA_000164415.1_ASM16441v1_genomic.fna.gz	Escherichia coli MS 110-3	strain=MS 110-3	5071839	0	0	0	0	0	0	0	0	0	0	3.85694e-05	3.85694e-05	3.85694e-05	3.85694e-05	3.85694e-05	3.39568e-05	3.39568e-05	3.39568e-05	3.39568e-05	3.39568e-05	3.04636e-05	3.04636e-05	3.04636e-05	3.04636e-05	3.04636e-05	0	0	0	0	0	0	0	0	0	0	3.54547e-05	3.54547e-05	3.54547e-05	3.54547e-05	3.54547e-05	3.18117e-05	3.18117e-05	3.18117e-05	3.18117e-05	3.18117e-05
749539	GCA_000164375.1_ASM16437v1_genomic.fna.gz	Escherichia coli MS 117-3	strain=MS 117-3	5035484	0	0	0	0	0	0	0	0	0	0	3.85694e-05	3.85694e-05	3.85694e-05	3.85694e-05	3.85694e-05	3.39568e-05	3.39568e-05	3.39568e-05	3.39568e-05	3.39568e-05	3.04636e-05	3.04636e-05	3.04636e-05	3.04636e-05	3.04636e-05	0	0	0	0	0	0	0	0	0	0	3.54547e-05	3.54547e-05	3.54547e-05	3.54547e-05	3.54547e-05	3.18117e-05	3.18117e-05	3.18117e-05	3.18117e-05	3.18117e-05
749541	GCA_000164435.1_ASM16443v1_genomic.fna.gz	Escherichia coli MS 153-1	strain=MS 153-1	5116862	0	0	0	0	0	0	0	0	0	0	0	0	0	0	0	3.39568e-05	3.39568e-05	3.39568e-05	3.39568e-05	3.39568e-05	3.04636e-05	3.04636e-05	3.04636e-05	3.04636e-05	3.04636e-05	0	0	0	0	0	0	0	0	0	0	0	0	0	0	0	3.18117e-05	3.18117e-05	3.18117e-05	3.18117e-05	3.18117e-05
749542	GCA_000164495.1_ASM16449v1_genomic.fna.gz	Escherichia coli MS 16-3	strain=MS 16-3	4982157	0	0	0	0	0	4.4286e-05	4.4286e-05	4.4286e-05	4.4286e-05	4.4286e-05	3.85694e-05	3.85694e-05	3.85694e-05	3.85694e-05	3.85694e-05	3.39568e-05	3.39568e-05	3.39568e-05	3.39568e-05	3.39568e-05	3.04636e-05	3.04636e-05	3.04636e-05	3.04636e-05	3.04636e-05	0	0	0	0	0	4.02611e-05	4.02611e-05	4.02611e-05	4.02611e-05	4.02611e-05	3.54547e-05	3.54547e-05	3.54547e-05	3.54547e-05	3.54547e-05	3.18117e-05	3.18117e-05	3.18117e-05	3.18117e-05	3.18117e-05
753642	GCA_000179795.1_ASM17979v1_genomic.fna.gz	Escherichia coli NC101	strain=NC101	5021144	0	0	0	0	0	4.4286e-05	4.4286e-05	4.4286e-05	4.4286e-05	4.4286e-05	3.85694e-05	3.85694e-05	3.85694e-05	3.85694e-05	3.85694e-05	3.39568e-05	3.39568e-05	3.39568e-05	3.39568e-05	3.39568e-05	3.04636e-05	3.04636e-05	3.04636e-05	3.04636e-05	3.04636e-05	0	0	0	0	0	4.02611e-05	4.02611e-05	4.02611e-05	4.02611e-05	4.02611e-05	3.54547e-05	3.54547e-05	3.54547e-05	3.54547e-05	3.54547e-05	3.18117e-05	3.18117e-05	3.18117e-05	3.18117e-05	3.18117e-05
754082	GCA_000194575.2_ASM19457v2_genomic.fna.gz	Escherichia coli STEC_7v	strain=STEC_7v	5195834	0	0	0	0	0	0	0	0	0	0	3.85694e-05	3.85694e-05	3.85694e-05	3.85694e-05	3.85694e-05	3.39568e-05	3.39568e-05	3.39568e-05	3.39568e-05	3.39568e-05	3.04636e-05	3.04636e-05	3.04636e-05	3.04636e-05	3.04636e-05	0	0	0	0	0	0	0	0	0	0	3.54547e-05	3.54547e-05	3.54547e-05	3.54547e-05	3.54547e-05	3.18117e-05	3.18117e-05	3.18117e-05	3.18117e-05	3.18117e-05
754092	GCA_000217895.2_ASM21789v2_genomic.fna.gz	Shigella flexneri SFJ17B	strain=SFJ17B	4729738	0	0	0	0	0	0	0	0	0	0	0.000197112	0.000197112	0.000197112	0.000197112	0.000197112	0.000173539	0.000173539	0.000173539	0.000173539	0.000173539	0.000155687	0.000155687	0.000155687	0.000155687	0.000155687	0	0	0	0	0	0	0	0	0	0	0.000162062	0.000162062	0.000162062	0.000162062	0.000162062	0.00014541	0.00014541	0.00014541	0.00014541	0.00014541
754093	GCA_000164925.2_ASM16492v1_genomic.fna.gz	Shigella dysenteriae 1617	strain=1617	4613557	0	0	0	0	0	0	0	0	0	0	0	0	0	0	0	0.000251816	0.000251816	0.000251816	0.000251816	0.000251816	0.000225911	0.000225911	0.000225911	0.000225911	0.000225911	0	0	0	0	0	0	0	0	0	0	0	0	0	0	0	0.000216579	0.000216579	0.000216579	0.000216579	0.000216579
759350	GCA_000092325.1_ASM9232v1_genomic.fna.gz	Bifidobacterium longum subsp. longum JDM301	strain=JDM301	2477838	0	0	0	0	0	0.00142207	0.00142207	0.00142207	0.00142207	0.00142207	0.0012385	0.0012385	0.0012385	0.0012385	0.0012385	0.00109039	0.00109039	0.00109039	0.00109039	0.00109039	0.000978221	0.000978221	0.000978221	0.000978221	0.000978221	0	0	0	0	0	0.00226483	0.00226483	0.00226483	0.00226483	0.00226483	0.00199446	0.00199446	0.00199446	0.00199446	0.00199446	0.00178953	0.00178953	0.00178953	0.00178953	0.00178953
760570	GCA_000164675.2_ASM16467v2_genomic.fna.gz	Streptococcus parasanguinis ATCC 15912	strain=ATCC 15912	2153652	0	0	0	0	0	0	0	0	0	0	0.00533689	0.00533689	0.00533689	0.00533689	0.00533689	0.00469865	0.00469865	0.00469865	0.00469865	0.00469865	0.00421529	0.00421529	0.00421529	0.00421529	0.00421529	0	0	0	0	0	0	0	0	0	0	0.00515319	0.00515319	0.00515319	0.00515319	0.00515319	0.0046237	0.0046237	0.0046237	0.0046237	0.0046237
762966	GCA_000205025.1_ASM20502v1_genomic.fna.gz	Parasutterella excrementihominis YIT 11859	strain=YIT 11859	2831696	0	0	0	0	0	0.0058221	0.0058221	0.0058221	0.0058221	0.0058221	0.00507056	0.00507056	0.00507056	0.00507056	0.00507056	0.00446417	0.00446417	0.00446417	0.00446417	0.00446417	0.00400493	0.00400493	0.00400493	0.00400493	0.00400493	0	0	0	0	0	0.00537987	0.00537987	0.00537987	0.00537987	0.00537987	0.00473762	0.00473762	0.00473762	0.00473762	0.00473762	0.00425083	0.00425083	0.00425083	0.00425083	0.00425083
762982	GCA_000205165.1_ASM20516v1_genomic.fna.gz	Paraprevotella xylaniphila YIT 11841	strain=YIT 11841	3789812	0	0	0	0	0	0	0	0	0	0	0	0	0	0	0	0.0024615	0.0024615	0.0024615	0.0024615	0.0024615	0.00220828	0.00220828	0.00220828	0.00220828	0.00220828	0	0	0	0	0	0	0	0	0	0	0	0	0	0	0	0.00210248	0.00210248	0.00210248	0.00210248	0.00210248
762983	GCA_000188195.1_ASM18819v1_genomic.fna.gz	Succinatimonas hippei YIT 12066	strain=YIT 12066	2306546	0	0	0	0	0	0	0	0	0	0	0	0	0	0	0	0	0	0	0	0	0.00203302	0.00203302	0.00203302	0.00203302	0.00203302	0	0	0	0	0	0	0	0	0	0	0	0	0	0	0	0	0	0	0	0
762984	GCA_000195615.1_ASM19561v1_genomic.fna.gz	Bacteroides clarus YIT 12056	strain=YIT 12056	3747170	0	0	0	0	0	0	0	0	0	0	0	0	0	0	0	0	0	0	0	0	0	0	0	0	0	0	0	0	0	0	0	0	0	0	0	0	0	0	0	0	0	0	0	0	0
763034	GCA_000195635.1_ASM19563v1_genomic.fna.gz	Bacteroides fluxus YIT 12057	strain=YIT 12057	4330716	0	0	0	0	0	0	0	0	0	0	0	0	0	0	0	0.00233076	0.00233076	0.00233076	0.00233076	0.00233076	0.00209099	0.00209099	0.00209099	0.00209099	0.00209099	0	0	0	0	0	0	0	0	0	0	0	0	0	0	0	0.00198857	0.00198857	0.00198857	0.00198857	0.00198857
766139	GCA_000211955.2_ASM21195v2_genomic.fna.gz	Shigella boydii 3594-74	strain=3594-74	4662214	0	0	0	0	0	0.00117505	0.00117505	0.00117505	0.00117505	0.00117505	0.00102337	0.00102337	0.00102337	0.00102337	0.00102337	0.000900985	0.000900985	0.000900985	0.000900985	0.000900985	0.000808299	0.000808299	0.000808299	0.000808299	0.000808299	0	0	0	0	0	0.000953795	0.000953795	0.000953795	0.000953795	0.000953795	0.00083993	0.00083993	0.00083993	0.00083993	0.00083993	0.000753628	0.000753628	0.000753628	0.000753628	0.000753628
766141	GCA_000211975.2_ASM21197v2_genomic.fna.gz	Shigella boydii 5216-82	strain=5216-82	4882454	0	0	0	0	0	0	0	0	0	0	0.000286022	0.000286022	0.000286022	0.000286022	0.000286022	0.000251816	0.000251816	0.000251816	0.000251816	0.000251816	0.000225911	0.000225911	0.000225911	0.000225911	0.000225911	0	0	0	0	0	0	0	0	0	0	0.000241381	0.000241381	0.000241381	0.000241381	0.000241381	0.000216579	0.000216579	0.000216579	0.000216579	0.000216579
766142	GCA_000211935.2_ASM21193v2_genomic.fna.gz	Shigella dysenteriae 155-74	strain=155-74	5162596	0	0	0	0	0	0	0	0	0	0	0	0	0	0	0	0	0	0	0	0	0.000225911	0.000225911	0.000225911	0.000225911	0.000225911	0	0	0	0	0	0	0	0	0	0	0	0	0	0	0	0	0	0	0	0
766145	GCA_000213695.2_ASM21369v2_genomic.fna.gz	Shigella flexneri VA-6	strain=VA-6	4679117	0	0	0	0	0	0	0	0	0	0	0	0	0	0	0	0.000173539	0.000173539	0.000173539	0.000173539	0.000173539	0.000155687	0.000155687	0.000155687	0.000155687	0.000155687	0	0	0	0	0	0	0	0	0	0	0	0	0	0	0	0.00014541	0.00014541	0.00014541	0.00014541	0.00014541
766146	GCA_000213675.2_ASM21367v2_genomic.fna.gz	Shigella flexneri K-218	strain=K-218	4925489	0	0	0	0	0	0	0	0	0	0	0	0	0	0	0	0	0	0	0	0	0.000155687	0.000155687	0.000155687	0.000155687	0.000155687	0	0	0	0	0	0	0	0	0	0	0	0	0	0	0	0	0	0	0	0
766147	GCA_000213735.2_ASM21373v2_genomic.fna.gz	Shigella flexneri K-227	strain=K-227	4919022	0	0	0	0	0	0	0	0	0	0	0.000197112	0.000197112	0.000197112	0.000197112	0.000197112	0.000173539	0.000173539	0.000173539	0.000173539	0.000173539	0.000155687	0.000155687	0.000155687	0.000155687	0.000155687	0	0	0	0	0	0	0	0	0	0	0.000162062	0.000162062	0.000162062	0.000162062	0.000162062	0.00014541	0.00014541	0.00014541	0.00014541	0.00014541
766148	GCA_000213715.2_ASM21371v2_genomic.fna.gz	Shigella flexneri K-272	strain=K-272	4510648	0	0	0	0	0	0	0	0	0	0	0	0	0	0	0	0.000173539	0.000173539	0.000173539	0.000173539	0.000173539	0.000155687	0.000155687	0.000155687	0.000155687	0.000155687	0	0	0	0	0	0	0	0	0	0	0	0	0	0	0	0.00014541	0.00014541	0.00014541	0.00014541	0.00014541
766149	GCA_000213755.2_ASM21375v2_genomic.fna.gz	Shigella flexneri K-304	strain=K-304	4790351	0	0	0	0	0	0	0	0	0	0	0	0	0	0	0	0.000173539	0.000173539	0.000173539	0.000173539	0.000173539	0.000155687	0.000155687	0.000155687	0.000155687	0.000155687	0	0	0	0	0	0	0	0	0	0	0	0	0	0	0	0.00014541	0.00014541	0.00014541	0.00014541	0.00014541
766152	GCA_000213435.2_ASM21343v2_genomic.fna.gz	Shigella flexneri K-671	strain=K-671	4715291	0	0	0	0	0	0.000226327	0.000226327	0.000226327	0.000226327	0.000226327	0.000197112	0.000197112	0.000197112	0.000197112	0.000197112	0.000173539	0.000173539	0.000173539	0.000173539	0.000173539	0.000155687	0.000155687	0.000155687	0.000155687	0.000155687	0	0	0	0	0	0.000184032	0.000184032	0.000184032	0.000184032	0.000184032	0.000162062	0.000162062	0.000162062	0.000162062	0.000162062	0.00014541	0.00014541	0.00014541	0.00014541	0.00014541
766157	GCA_000213455.2_ASM21345v2_genomic.fna.gz	Shigella flexneri 2747-71	strain=2747-71	4656186	0	0	0	0	0	0	0	0	0	0	0	0	0	0	0	0	0	0	0	0	0.000155687	0.000155687	0.000155687	0.000155687	0.000155687	0	0	0	0	0	0	0	0	0	0	0	0	0	0	0	0	0	0	0	0
766159	GCA_000213495.2_ASM21349v2_genomic.fna.gz	Shigella flexneri 2930-71	strain=2930-71	4644642	0	0	0	0	0	0	0	0	0	0	0	0	0	0	0	0	0	0	0	0	0.000155687	0.000155687	0.000155687	0.000155687	0.000155687	0	0	0	0	0	0	0	0	0	0	0	0	0	0	0	0	0	0	0	0
766160	GCA_000213475.2_ASM21347v2_genomic.fna.gz	Shigella flexneri 4343-70	strain=4343-70	4323161	0	0	0	0	0	0	0	0	0	0	0	0	0	0	0	0.000173539	0.000173539	0.000173539	0.000173539	0.000173539	0.000155687	0.000155687	0.000155687	0.000155687	0.000155687	0	0	0	0	0	0	0	0	0	0	0	0	0	0	0	0.00014541	0.00014541	0.00014541	0.00014541	0.00014541
767455	GCA_000182835.1_ASM18283v1_genomic.fna.gz	Lactobacillus delbrueckii subsp. bulgaricus ND02	strain=ND02	2131976	0	0	0	0	0	0	0	0	0	0	0	0	0	0	0	0	0	0	0	0	0.000485733	0.000485733	0.000485733	0.000485733	0.000485733	0	0	0	0	0	0	0	0	0	0	0	0	0	0	0	0	0	0	0	0
767463	GCA_000182875.1_ASM18287v1_genomic.fna.gz	Streptococcus thermophilus ND03	strain=ND03	1831949	0	0	0	0	0	0.00697579	0.00697579	0.00697579	0.00697579	0.00697579	0.00607532	0.00607532	0.00607532	0.00607532	0.00607532	0.00534877	0.00534877	0.00534877	0.00534877	0.00534877	0.00479853	0.00479853	0.00479853	0.00479853	0.00479853	0	0	0	0	0	0.00716311	0.00716311	0.00716311	0.00716311	0.00716311	0.00630797	0.00630797	0.00630797	0.00630797	0.00630797	0.00565983	0.00565983	0.00565983	0.00565983	0.00565983
768724	GCA_000179335.1_ASM17933v1_genomic.fna.gz	Peptoniphilus sp. oral taxon 836 str. F0141	strain=F0141	1625156	0	0	0	0	0	0	0	0	0	0	0	0	0	0	0	0	0	0	0	0	0	0	0	0	0	0	0	0	0	0	0	0	0	0	0	0	0	0	0	0	0	0	0	0	0
768728	GCA_000179475.1_ASM17947v1_genomic.fna.gz	Lactobacillus salivarius ACS-116-V-Col5a	strain=ACS-116-V-Col5a	2044602	0	0	0	0	0	0	0	0	0	0	0	0	0	0	0	0	0	0	0	0	0.000737552	0.000737552	0.000737552	0.000737552	0.000737552	0	0	0	0	0	0	0	0	0	0	0	0	0	0	0	0	0	0	0	0
784613	GCA_000179375.1_ASM17937v1_genomic.fna.gz	Lactobacillus delbrueckii subsp. bulgaricus PB2003/044-T3-4	strain=PB2003/044-T3-4	1977342	0	0	0	0	0	0	0	0	0	0	0	0	0	0	0	0.000541432	0.000541432	0.000541432	0.000541432	0.000541432	0.000485733	0.000485733	0.000485733	0.000485733	0.000485733	0	0	0	0	0	0	0	0	0	0	0	0	0	0	0	0.000458566	0.000458566	0.000458566	0.000458566	0.000458566
796392	GCA_000179095.1_ASM17909v1_genomic.fna.gz	Escherichia coli MS 79-10	strain=MS 79-10	4900086	0	0	0	0	0	4.4286e-05	4.4286e-05	4.4286e-05	4.4286e-05	4.4286e-05	3.85694e-05	3.85694e-05	3.85694e-05	3.85694e-05	3.85694e-05	3.39568e-05	3.39568e-05	3.39568e-05	3.39568e-05	3.39568e-05	3.04636e-05	3.04636e-05	3.04636e-05	3.04636e-05	3.04636e-05	0	0	0	0	0	4.02611e-05	4.02611e-05	4.02611e-05	4.02611e-05	4.02611e-05	3.54547e-05	3.54547e-05	3.54547e-05	3.54547e-05	3.54547e-05	3.18117e-05	3.18117e-05	3.18117e-05	3.18117e-05	3.18117e-05
862962	GCA_000210835.1_ASM21083v1_genomic.fna.gz	Bacteroides fragilis 638R	strain=638R	5373121	0	0	0	0	0	0	0	0	0	0	0	0	0	0	0	0.000602446	0.000602446	0.000602446	0.000602446	0.000602446	0.000540471	0.000540471	0.000540471	0.000540471	0.000540471	0	0	0	0	0	0	0	0	0	0	0	0	0	0	0	0.00051026	0.00051026	0.00051026	0.00051026	0.00051026
862965	GCA_000210895.1_ASM21089v1_genomic.fna.gz	Haemophilus parainfluenzae T3T1	strain=T3T1	2086875	0	0	0	0	0	0.00631832	0.00631832	0.00631832	0.00631832	0.00631832	0.00550272	0.00550272	0.00550272	0.00550272	0.00550272	0.00484465	0.00484465	0.00484465	0.00484465	0.00484465	0.00434627	0.00434627	0.00434627	0.00434627	0.00434627	0	0	0	0	0	0.00629223	0.00629223	0.00629223	0.00629223	0.00629223	0.00554106	0.00554106	0.00554106	0.00554106	0.00554106	0.00497172	0.00497172	0.00497172	0.00497172	0.00497172
864569	GCA_000146405.1_ASM14640v1_genomic.fna.gz	Streptococcus equinus ATCC 700338	strain=ATCC 700338	2083084	0	0	0	0	0	0	0	0	0	0	0	0	0	0	0	0	0	0	0	0	0	0	0	0	0	0	0	0	0	0	0	0	0	0	0	0	0	0	0	0	0	0	0	0	0
864570	GCA_000146755.1_ASM14675v1_genomic.fna.gz	Streptococcus sp. oral taxon 071 str. 73H25AP	strain=73H25AP	1976523	0	0	0	0	0	0	0	0	0	0	0	0	0	0	0	0	0	0	0	0	0.00219562	0.00219562	0.00219562	0.00219562	0.00219562	0	0	0	0	0	0	0	0	0	0	0	0	0	0	0	0	0	0	0	0
866768	GCA_000023665.1_ASM2366v1_genomic.fna.gz	Escherichia coli BL21-Gold(DE3)pLysS AG	strain=BL21-Gold(DE3)pLysS AG	4570938	0	0	0	0	0	4.4286e-05	4.4286e-05	4.4286e-05	4.4286e-05	4.4286e-05	3.85694e-05	3.85694e-05	3.85694e-05	3.85694e-05	3.85694e-05	3.39568e-05	3.39568e-05	3.39568e-05	3.39568e-05	3.39568e-05	3.04636e-05	3.04636e-05	3.04636e-05	3.04636e-05	3.04636e-05	0	0	0	0	0	4.02611e-05	4.02611e-05	4.02611e-05	4.02611e-05	4.02611e-05	3.54547e-05	3.54547e-05	3.54547e-05	3.54547e-05	3.54547e-05	3.18117e-05	3.18117e-05	3.18117e-05	3.18117e-05	3.18117e-05
866771	GCA_000179675.1_ASM17967v1_genomic.fna.gz	Prevotella disiens FB035-09AN	strain=FB035-09AN	3003828	0	0	0	0	0	0	0	0	0	0	0	0	0	0	0	0	0	0	0	0	0.00193237	0.00193237	0.00193237	0.00193237	0.00193237	0	0	0	0	0	0	0	0	0	0	0	0	0	0	0	0	0	0	0	0
866776	GCA_000179735.1_ASM17973v1_genomic.fna.gz	Veillonella atypica ACS-049-V-Sch6	strain=ACS-049-V-Sch6	2053871	0	0	0	0	0	0	0	0	0	0	0.00301604	0.00301604	0.00301604	0.00301604	0.00301604	0.00265535	0.00265535	0.00265535	0.00265535	0.00265535	0.00238219	0.00238219	0.00238219	0.00238219	0.00238219	0	0	0	0	0	0	0	0	0	0	0.00314716	0.00314716	0.00314716	0.00314716	0.00314716	0.00282379	0.00282379	0.00282379	0.00282379	0.00282379
866777	GCA_000213865.1_ASM21386v1_genomic.fna.gz	Bifidobacterium breve ACS-071-V-Sch8b	strain=ACS-071-V-Sch8b	2327492	0	0	0	0	0	0	0	0	0	0	0	0	0	0	0	0	0	0	0	0	0.000703774	0.000703774	0.000703774	0.000703774	0.000703774	0	0	0	0	0	0	0	0	0	0	0	0	0	0	0	0	0	0	0	0
866778	GCA_000179755.1_ASM17975v1_genomic.fna.gz	Veillonella atypica ACS-134-V-Col7a	strain=ACS-134-V-Col7a	2151913	0	0	0	0	0	0	0	0	0	0	0.00301604	0.00301604	0.00301604	0.00301604	0.00301604	0.00265535	0.00265535	0.00265535	0.00265535	0.00265535	0.00238219	0.00238219	0.00238219	0.00238219	0.00238219	0	0	0	0	0	0	0	0	0	0	0.00314716	0.00314716	0.00314716	0.00314716	0.00314716	0.00282379	0.00282379	0.00282379	0.00282379	0.00282379
869729	GCA_000148605.1_ASM14860v1_genomic.fna.gz	Escherichia coli UM146	strain=UM146	5107563	0	0	0	0	0	4.4286e-05	4.4286e-05	4.4286e-05	4.4286e-05	4.4286e-05	3.85694e-05	3.85694e-05	3.85694e-05	3.85694e-05	3.85694e-05	3.39568e-05	3.39568e-05	3.39568e-05	3.39568e-05	3.39568e-05	3.04636e-05	3.04636e-05	3.04636e-05	3.04636e-05	3.04636e-05	0	0	0	0	0	4.02611e-05	4.02611e-05	4.02611e-05	4.02611e-05	4.02611e-05	3.54547e-05	3.54547e-05	3.54547e-05	3.54547e-05	3.54547e-05	3.18117e-05	3.18117e-05	3.18117e-05	3.18117e-05	3.18117e-05
871237	GCA_000148975.2_ASM14897v1_genomic.fna.gz	Streptococcus infantis SK1302	strain=SK1302	1792252	0	0	0	0	0	0	0	0	0	0	0	0	0	0	0	0	0	0	0	0	0	0	0	0	0	0	0	0	0	0	0	0	0	0	0	0	0	0	0	0	0	0	0	0	0
871562	GCA_000146775.1_ASM14677v1_genomic.fna.gz	Bifidobacterium dentium ATCC 27679	strain=ATCC 27679	2645781	0	0	0	0	0	0	0	0	0	0	0	0	0	0	0	0.00065969	0.00065969	0.00065969	0.00065969	0.00065969	0.000591826	0.000591826	0.000591826	0.000591826	0.000591826	0	0	0	0	0	0	0	0	0	0	0	0	0	0	0	0.000556791	0.000556791	0.000556791	0.000556791	0.000556791
873513	GCA_000184945.1_ASM18494v1_genomic.fna.gz	Prevotella buccae ATCC 33574	strain=ATCC 33574	3284105	0	0	0	0	0	0	0	0	0	0	0	0	0	0	0	0	0	0	0	0	0.000569829	0.000569829	0.000569829	0.000569829	0.000569829	0	0	0	0	0	0	0	0	0	0	0	0	0	0	0	0	0	0	0	0
879243	GCA_000212375.1_ASM21237v1_genomic.fna.gz	Porphyromonas asaccharolytica DSM 20707	strain=DSM 20707	2186370	0	0	0	0	0	0	0	0	0	0	0	0	0	0	0	0	0	0	0	0	0	0	0	0	0	0	0	0	0	0	0	0	0	0	0	0	0	0	0	0	0	0	0	0	0
879309	GCA_000183505.2_ASM18350v1_genomic.fna.gz	Veillonella sp. oral taxon 158 str. F0412	strain=F0412	2176752	0	0	0	0	0	0.0061153	0.0061153	0.0061153	0.0061153	0.0061153	0.00532591	0.00532591	0.00532591	0.00532591	0.00532591	0.00468898	0.00468898	0.00468898	0.00468898	0.00468898	0.00420662	0.00420662	0.00420662	0.00420662	0.00420662	0	0	0	0	0	0.00580182	0.00580182	0.00580182	0.00580182	0.00580182	0.0051092	0.0051092	0.0051092	0.0051092	0.0051092	0.00458423	0.00458423	0.00458423	0.00458423	0.00458423
883062	GCA_000164965.1_ASM16496v1_genomic.fna.gz	Bifidobacterium bifidum S17	strain=S17	2186882	0	0	0	0	0	0	0	0	0	0	0.00121829	0.00121829	0.00121829	0.00121829	0.00121829	0.00107259	0.00107259	0.00107259	0.00107259	0.00107259	0.000962254	0.000962254	0.000962254	0.000962254	0.000962254	0	0	0	0	0	0	0	0	0	0	0.00101023	0.00101023	0.00101023	0.00101023	0.00101023	0.000906427	0.000906427	0.000906427	0.000906427	0.000906427
885275	GCA_000233895.1_ASM23389v1_genomic.fna.gz	Escherichia coli str. clone D i14	strain=clone D i14	5038386	0	0	0	0	0	0	0	0	0	0	3.85694e-05	3.85694e-05	3.85694e-05	3.85694e-05	3.85694e-05	3.39568e-05	3.39568e-05	3.39568e-05	3.39568e-05	3.39568e-05	3.04636e-05	3.04636e-05	3.04636e-05	3.04636e-05	3.04636e-05	0	0	0	0	0	0	0	0	0	0	3.54547e-05	3.54547e-05	3.54547e-05	3.54547e-05	3.54547e-05	3.18117e-05	3.18117e-05	3.18117e-05	3.18117e-05	3.18117e-05
885276	GCA_000233875.1_ASM23387v1_genomic.fna.gz	Escherichia coli str. clone D i2	strain=clone D i2	5038386	7.35266e-05	7.35266e-05	7.35266e-05	7.35266e-05	7.35266e-05	4.4286e-05	4.4286e-05	4.4286e-05	4.4286e-05	4.4286e-05	3.85694e-05	3.85694e-05	3.85694e-05	3.85694e-05	3.85694e-05	3.39568e-05	3.39568e-05	3.39568e-05	3.39568e-05	3.39568e-05	3.04636e-05	3.04636e-05	3.04636e-05	3.04636e-05	3.04636e-05	7.54848e-05	7.54848e-05	7.54848e-05	7.54848e-05	7.54848e-05	4.02611e-05	4.02611e-05	4.02611e-05	4.02611e-05	4.02611e-05	3.54547e-05	3.54547e-05	3.54547e-05	3.54547e-05	3.54547e-05	3.18117e-05	3.18117e-05	3.18117e-05	3.18117e-05	3.18117e-05
888048	GCA_000187505.1_ASM18750v1_genomic.fna.gz	Streptococcus parasanguinis ATCC 903	strain=ATCC 903	2131530	0	0	0	0	0	0	0	0	0	0	0.00168555	0.00168555	0.00168555	0.00168555	0.00168555	0.00148398	0.00148398	0.00148398	0.00148398	0.00148398	0.00133132	0.00133132	0.00133132	0.00133132	0.00133132	0	0	0	0	0	0	0	0	0	0	0.00137612	0.00137612	0.00137612	0.00137612	0.00137612	0.00123473	0.00123473	0.00123473	0.00123473	0.00123473
888057	GCA_000185305.1_ASM18530v1_genomic.fna.gz	Aggregatibacter segnis ATCC 33393	strain=ATCC 33393	2012010	0	0	0	0	0	0	0	0	0	0	0	0	0	0	0	0	0	0	0	0	0.000225911	0.000225911	0.000225911	0.000225911	0.000225911	0	0	0	0	0	0	0	0	0	0	0	0	0	0	0	0	0	0	0	0
888063	GCA_000213995.1_ASM21399v1_genomic.fna.gz	Enterobacter hormaechei ATCC 49162	strain=ATCC 49162	4860996	0	0	0	0	0	0	0	0	0	0	0.0024327	0.0024327	0.0024327	0.0024327	0.0024327	0.00214177	0.00214177	0.00214177	0.00214177	0.00214177	0.00192144	0.00192144	0.00192144	0.00192144	0.00192144	0	0	0	0	0	0	0	0	0	0	0.00210849	0.00210849	0.00210849	0.00210849	0.00210849	0.00189184	0.00189184	0.00189184	0.00189184	0.00189184
888825	GCA_000188275.1_ASM18827v1_genomic.fna.gz	Streptococcus sanguinis VMC66	strain=VMC66	2319451	0	0	0	0	0	0	0	0	0	0	0	0	0	0	0	0.00141894	0.00141894	0.00141894	0.00141894	0.00141894	0.00127297	0.00127297	0.00127297	0.00127297	0.00127297	0	0	0	0	0	0	0	0	0	0	0	0	0	0	0	0.00117527	0.00117527	0.00117527	0.00117527	0.00117527
888828	GCA_000191405.1_ASM19140v1_genomic.fna.gz	Haemophilus parainfluenzae ATCC 33392	strain=ATCC 33392	2124757	0	0	0	0	0	0	0	0	0	0	0	0	0	0	0	0.00261481	0.00261481	0.00261481	0.00261481	0.00261481	0.00234582	0.00234582	0.00234582	0.00234582	0.00234582	0	0	0	0	0	0	0	0	0	0	0	0	0	0	0	0.00219421	0.00219421	0.00219421	0.00219421	0.00219421
888833	GCA_000186465.1_ASM18646v1_genomic.fna.gz	Streptococcus australis ATCC 700641	strain=ATCC 700641	2129953	0	0	0	0	0	0	0	0	0	0	0	0	0	0	0	0	0	0	0	0	0.000261138	0.000261138	0.000261138	0.000261138	0.000261138	0	0	0	0	0	0	0	0	0	0	0	0	0	0	0	0	0	0	0	0
889206	GCA_000188295.1_ASM18829v1_genomic.fna.gz	Streptococcus vestibularis ATCC 49124	strain=ATCC 49124	1872773	0	0	0	0	0	0	0	0	0	0	0	0	0	0	0	0.00158031	0.00158031	0.00158031	0.00158031	0.00158031	0.00141774	0.00141774	0.00141774	0.00141774	0.00141774	0	0	0	0	0	0	0	0	0	0	0	0	0	0	0	0.00133154	0.00133154	0.00133154	0.00133154	0.00133154
890402	GCA_000166315.1_ASM16631v1_genomic.fna.gz	Bifidobacterium longum subsp. longum BBMN68	strain=BBMN68	2265943	0.00236102	0.00236102	0.00236102	0.00236102	0.00236102	0.00142207	0.00142207	0.00142207	0.00142207	0.00142207	0.0012385	0.0012385	0.0012385	0.0012385	0.0012385	0.00109039	0.00109039	0.00109039	0.00109039	0.00109039	0.000978221	0.000978221	0.000978221	0.000978221	0.000978221	0.0042463	0.0042463	0.0042463	0.0042463	0.0042463	0.00226483	0.00226483	0.00226483	0.00226483	0.00226483	0.00199446	0.00199446	0.00199446	0.00199446	0.00199446	0.00178953	0.00178953	0.00178953	0.00178953	0.00178953
904306	GCA_000180075.1_ASM18007v1_genomic.fna.gz	Streptococcus vestibularis F0396	strain=F0396	2022289	0	0	0	0	0	0	0	0	0	0	0	0	0	0	0	0.00158031	0.00158031	0.00158031	0.00158031	0.00158031	0.00141774	0.00141774	0.00141774	0.00141774	0.00141774	0	0	0	0	0	0	0	0	0	0	0	0	0	0	0	0.00133154	0.00133154	0.00133154	0.00133154	0.00133154
905067	GCA_000180035.1_ASM18003v1_genomic.fna.gz	Streptococcus parasanguinis F0405	strain=F0405	2050302	0	0	0	0	0	0	0	0	0	0	0	0	0	0	0	0	0	0	0	0	0.00133132	0.00133132	0.00133132	0.00133132	0.00133132	0	0	0	0	0	0	0	0	0	0	0	0	0	0	0	0	0	0	0	0
908338	GCA_000183565.2_ASM18356v1_genomic.fna.gz	Peptoniphilus harei ACS-146-V-Sch2b	strain=ACS-146-V-Sch2b	1836030	0	0	0	0	0	0	0	0	0	0	0	0	0	0	0	0	0	0	0	0	0	0	0	0	0	0	0	0	0	0	0	0	0	0	0	0	0	0	0	0	0	0	0	0	0
908339	GCA_000180015.1_ASM18001v1_genomic.fna.gz	Lactobacillus oris PB013-T2-3	strain=PB013-T2-3	2115990	0	0	0	0	0	0	0	0	0	0	0	0	0	0	0	0	0	0	0	0	0	0	0	0	0	0	0	0	0	0	0	0	0	0	0	0	0	0	0	0	0	0	0	0	0
908340	GCA_000183585.2_ASM18358v1_genomic.fna.gz	Clostridium sp. HGF2	strain=HGF2	4099852	0	0	0	0	0	0	0	0	0	0	0	0	0	0	0	0	0	0	0	0	0	0	0	0	0	0	0	0	0	0	0	0	0	0	0	0	0	0	0	0	0	0	0	0	0
908612	GCA_000183485.2_ASM18348v1_genomic.fna.gz	Alistipes sp. HGB5	strain=HGB5	3464615	0	0	0	0	0	0	0	0	0	0	0	0	0	0	0	0	0	0	0	0	0.00172894	0.00172894	0.00172894	0.00172894	0.00172894	0	0	0	0	0	0	0	0	0	0	0	0	0	0	0	0	0	0	0	0
909954	GCA_000204985.1_ASM20498v1_genomic.fna.gz	Lactobacillus johnsonii DPC 6026	strain=DPC 6026	1966342	0	0	0	0	0	0	0	0	0	0	0	0	0	0	0	0.00101633	0.00101633	0.00101633	0.00101633	0.00101633	0.000911774	0.000911774	0.000911774	0.000911774	0.000911774	0	0	0	0	0	0	0	0	0	0	0	0	0	0	0	0.000856023	0.000856023	0.000856023	0.000856023	0.000856023
910310	GCA_000191865.2_ASM19186v1_genomic.fna.gz	Turicibacter sp. HGF1	strain=HGF1	2947473	0	0	0	0	0	0	0	0	0	0	0	0	0	0	0	0.00122879	0.00122879	0.00122879	0.00122879	0.00122879	0.00110238	0.00110238	0.00110238	0.00110238	0.00110238	0	0	0	0	0	0	0	0	0	0	0	0	0	0	0	0.00103894	0.00103894	0.00103894	0.00103894	0.00103894
910311	GCA_000191845.2_ASM19184v1_genomic.fna.gz	Eggerthella sp. HGA1	strain=HGA1	3362931	0	0	0	0	0	0	0	0	0	0	0	0	0	0	0	0.00248035	0.00248035	0.00248035	0.00248035	0.00248035	0.00222519	0.00222519	0.00222519	0.00222519	0.00222519	0	0	0	0	0	0	0	0	0	0	0	0	0	0	0	0.00214467	0.00214467	0.00214467	0.00214467	0.00214467
910312	GCA_000183605.2_ASM18360v1_genomic.fna.gz	Porphyromonas asaccharolytica PR426713P-I	strain=PR426713P-I	2199119	0	0	0	0	0	0	0	0	0	0	0	0	0	0	0	0	0	0	0	0	0.000878476	0.000878476	0.000878476	0.000878476	0.000878476	0	0	0	0	0	0	0	0	0	0	0	0	0	0	0	0	0	0	0	0
926026	GCA_000187285.4_ASM18728v4_genomic.fna.gz	Escherichia coli O157:H7 str. G5101	strain=G5101	5061556	7.35266e-05	7.35266e-05	7.35266e-05	7.35266e-05	7.35266e-05	4.4286e-05	4.4286e-05	4.4286e-05	4.4286e-05	4.4286e-05	3.85694e-05	3.85694e-05	3.85694e-05	3.85694e-05	3.85694e-05	3.39568e-05	3.39568e-05	3.39568e-05	3.39568e-05	3.39568e-05	3.04636e-05	3.04636e-05	3.04636e-05	3.04636e-05	3.04636e-05	7.54848e-05	7.54848e-05	7.54848e-05	7.54848e-05	7.54848e-05	4.02611e-05	4.02611e-05	4.02611e-05	4.02611e-05	4.02611e-05	3.54547e-05	3.54547e-05	3.54547e-05	3.54547e-05	3.54547e-05	3.18117e-05	3.18117e-05	3.18117e-05	3.18117e-05	3.18117e-05
926027	GCA_000187305.2_ASM18730v2_genomic.fna.gz	Escherichia coli O157:H- str. 493-89	strain=493-89	5054824	0	0	0	0	0	4.4286e-05	4.4286e-05	4.4286e-05	4.4286e-05	4.4286e-05	3.85694e-05	3.85694e-05	3.85694e-05	3.85694e-05	3.85694e-05	3.39568e-05	3.39568e-05	3.39568e-05	3.39568e-05	3.39568e-05	3.04636e-05	3.04636e-05	3.04636e-05	3.04636e-05	3.04636e-05	0	0	0	0	0	4.02611e-05	4.02611e-05	4.02611e-05	4.02611e-05	4.02611e-05	3.54547e-05	3.54547e-05	3.54547e-05	3.54547e-05	3.54547e-05	3.18117e-05	3.18117e-05	3.18117e-05	3.18117e-05	3.18117e-05
926028	GCA_000187325.2_ASM18732v2_genomic.fna.gz	Escherichia coli O157:H- str. H 2687	strain=H 2687	5048194	0	0	0	0	0	0	0	0	0	0	0	0	0	0	0	3.39568e-05	3.39568e-05	3.39568e-05	3.39568e-05	3.39568e-05	3.04636e-05	3.04636e-05	3.04636e-05	3.04636e-05	3.04636e-05	0	0	0	0	0	0	0	0	0	0	0	0	0	0	0	3.18117e-05	3.18117e-05	3.18117e-05	3.18117e-05	3.18117e-05
926029	GCA_000187345.2_ASM18734v2_genomic.fna.gz	Escherichia coli O55:H7 str. 3256-97	strain=3256-97 TW 07815	5083624	0	0	0	0	0	0	0	0	0	0	3.85694e-05	3.85694e-05	3.85694e-05	3.85694e-05	3.85694e-05	3.39568e-05	3.39568e-05	3.39568e-05	3.39568e-05	3.39568e-05	3.04636e-05	3.04636e-05	3.04636e-05	3.04636e-05	3.04636e-05	0	0	0	0	0	0	0	0	0	0	3.54547e-05	3.54547e-05	3.54547e-05	3.54547e-05	3.54547e-05	3.18117e-05	3.18117e-05	3.18117e-05	3.18117e-05	3.18117e-05
926030	GCA_000187365.2_ASM18736v2_genomic.fna.gz	Escherichia coli O55:H7 str. USDA 5905	strain=USDA 5905	5105283	0	0	0	0	0	4.4286e-05	4.4286e-05	4.4286e-05	4.4286e-05	4.4286e-05	3.85694e-05	3.85694e-05	3.85694e-05	3.85694e-05	3.85694e-05	3.39568e-05	3.39568e-05	3.39568e-05	3.39568e-05	3.39568e-05	3.04636e-05	3.04636e-05	3.04636e-05	3.04636e-05	3.04636e-05	0	0	0	0	0	4.02611e-05	4.02611e-05	4.02611e-05	4.02611e-05	4.02611e-05	3.54547e-05	3.54547e-05	3.54547e-05	3.54547e-05	3.54547e-05	3.18117e-05	3.18117e-05	3.18117e-05	3.18117e-05	3.18117e-05
926032	GCA_000187385.2_ASM18738v2_genomic.fna.gz	Escherichia coli O157:H7 str. LSU-61	strain=LSU-61	5048276	0	0	0	0	0	0	0	0	0	0	3.85694e-05	3.85694e-05	3.85694e-05	3.85694e-05	3.85694e-05	3.39568e-05	3.39568e-05	3.39568e-05	3.39568e-05	3.39568e-05	3.04636e-05	3.04636e-05	3.04636e-05	3.04636e-05	3.04636e-05	0	0	0	0	0	0	0	0	0	0	3.54547e-05	3.54547e-05	3.54547e-05	3.54547e-05	3.54547e-05	3.18117e-05	3.18117e-05	3.18117e-05	3.18117e-05	3.18117e-05
929102	GCA_000192705.1_ASM19270v1_genomic.fna.gz	Lactococcus lactis subsp. lactis CV56	strain=CV56	2518737	0	0	0	0	0	0	0	0	0	0	0	0	0	0	0	0.000954308	0.000954308	0.000954308	0.000954308	0.000954308	0.000856136	0.000856136	0.000856136	0.000856136	0.000856136	0	0	0	0	0	0	0	0	0	0	0	0	0	0	0	0.000786999	0.000786999	0.000786999	0.000786999	0.000786999
932676	GCA_000193915.2_ASM19391v2_genomic.fna.gz	Shigella boydii ATCC 9905	strain=ATCC 9905	5129830	0	0	0	0	0	0	0	0	0	0	0	0	0	0	0	0	0	0	0	0	0.000225911	0.000225911	0.000225911	0.000225911	0.000225911	0	0	0	0	0	0	0	0	0	0	0	0	0	0	0	0	0	0	0	0
941429	GCA_000193895.2_ASM19389v2_genomic.fna.gz	Shigella dysenteriae CDC 74-1112	strain=CDC 74-1112	4596141	0	0	0	0	0	0	0	0	0	0	0.000286022	0.000286022	0.000286022	0.000286022	0.000286022	0.000251816	0.000251816	0.000251816	0.000251816	0.000251816	0.000225911	0.000225911	0.000225911	0.000225911	0.000225911	0	0	0	0	0	0	0	0	0	0	0.000241381	0.000241381	0.000241381	0.000241381	0.000241381	0.000216579	0.000216579	0.000216579	0.000216579	0.000216579
941435	GCA_000193955.2_ASM19395v2_genomic.fna.gz	Escherichia coli O157:H7 str. EC1212	strain=EC1212	5510053	7.35266e-05	7.35266e-05	7.35266e-05	7.35266e-05	7.35266e-05	4.4286e-05	4.4286e-05	4.4286e-05	4.4286e-05	4.4286e-05	3.85694e-05	3.85694e-05	3.85694e-05	3.85694e-05	3.85694e-05	3.39568e-05	3.39568e-05	3.39568e-05	3.39568e-05	3.39568e-05	3.04636e-05	3.04636e-05	3.04636e-05	3.04636e-05	3.04636e-05	7.54848e-05	7.54848e-05	7.54848e-05	7.54848e-05	7.54848e-05	4.02611e-05	4.02611e-05	4.02611e-05	4.02611e-05	4.02611e-05	3.54547e-05	3.54547e-05	3.54547e-05	3.54547e-05	3.54547e-05	3.18117e-05	3.18117e-05	3.18117e-05	3.18117e-05	3.18117e-05
944560	GCA_000223355.2_ASM22335v1_genomic.fna.gz	Actinomyces sp. oral taxon 175 str. F0384	strain=F0384	3133330	0	0	0	0	0	0.00374803	0.00374803	0.00374803	0.00374803	0.00374803	0.00326422	0.00326422	0.00326422	0.00326422	0.00326422	0.00287385	0.00287385	0.00287385	0.00287385	0.00287385	0.00257821	0.00257821	0.00257821	0.00257821	0.00257821	0	0	0	0	0	0.00308812	0.00308812	0.00308812	0.00308812	0.00308812	0.00271946	0.00271946	0.00271946	0.00271946	0.00271946	0.00244004	0.00244004	0.00244004	0.00244004	0.00244004
945360	GCA_000193935.2_ASM19393v2_genomic.fna.gz	Shigella flexneri CDC 796-83	strain=CDC 796-83	4682763	0	0	0	0	0	0	0	0	0	0	0	0	0	0	0	0	0	0	0	0	0.000155687	0.000155687	0.000155687	0.000155687	0.000155687	0	0	0	0	0	0	0	0	0	0	0	0	0	0	0	0	0	0	0	0
945434	GCA_000193995.2_ASM19399v2_genomic.fna.gz	Escherichia coli EC4100B	strain=EC4100B	5111899	0	0	0	0	0	0	0	0	0	0	3.85694e-05	3.85694e-05	3.85694e-05	3.85694e-05	3.85694e-05	3.39568e-05	3.39568e-05	3.39568e-05	3.39568e-05	3.39568e-05	3.04636e-05	3.04636e-05	3.04636e-05	3.04636e-05	3.04636e-05	0	0	0	0	0	0	0	0	0	0	3.54547e-05	3.54547e-05	3.54547e-05	3.54547e-05	3.54547e-05	3.18117e-05	3.18117e-05	3.18117e-05	3.18117e-05	3.18117e-05
981540	GCA_000270165.1_ASM27016v1_genomic.fna.gz	Streptococcus pasteurianus ATCC 43144	strain=ATCC 43144	2100077	0	0	0	0	0	0	0	0	0	0	0.00412437	0.00412437	0.00412437	0.00412437	0.00412437	0.00363113	0.00363113	0.00363113	0.00363113	0.00363113	0.00325759	0.00325759	0.00325759	0.00325759	0.00325759	0	0	0	0	0	0	0	0	0	0	0.00344698	0.00344698	0.00344698	0.00344698	0.00344698	0.00309281	0.00309281	0.00309281	0.00309281	0.00309281
997825	GCA_000192685.2_ASM19268v2_genomic.fna.gz	Escherichia coli O157:H7 str. 1125	strain=1125	5569621	0	0	0	0	0	4.4286e-05	4.4286e-05	4.4286e-05	4.4286e-05	4.4286e-05	3.85694e-05	3.85694e-05	3.85694e-05	3.85694e-05	3.85694e-05	3.39568e-05	3.39568e-05	3.39568e-05	3.39568e-05	3.39568e-05	3.04636e-05	3.04636e-05	3.04636e-05	3.04636e-05	3.04636e-05	0	0	0	0	0	4.02611e-05	4.02611e-05	4.02611e-05	4.02611e-05	4.02611e-05	3.54547e-05	3.54547e-05	3.54547e-05	3.54547e-05	3.54547e-05	3.18117e-05	3.18117e-05	3.18117e-05	3.18117e-05	3.18117e-05
1000570	GCA_000214555.2_ASM21455v1_genomic.fna.gz	Streptococcus anginosus SK52 = DSM 20563	strain=SK52	1892386	0	0	0	0	0	0	0	0	0	0	0.00147584	0.00147584	0.00147584	0.00147584	0.00147584	0.00129934	0.00129934	0.00129934	0.00129934	0.00129934	0.00116568	0.00116568	0.00116568	0.00116568	0.00116568	0	0	0	0	0	0	0	0	0	0	0.0012482	0.0012482	0.0012482	0.0012482	0.0012482	0.00111995	0.00111995	0.00111995	0.00111995	0.00111995
1001989	GCA_000219515.3_ASM21951v3_genomic.fna.gz	Escherichia coli PCN033	strain=PCN033	5156873	0	0	0	0	0	0	0	0	0	0	3.85694e-05	3.85694e-05	3.85694e-05	3.85694e-05	3.85694e-05	3.39568e-05	3.39568e-05	3.39568e-05	3.39568e-05	3.39568e-05	3.04636e-05	3.04636e-05	3.04636e-05	3.04636e-05	3.04636e-05	0	0	0	0	0	0	0	0	0	0	3.54547e-05	3.54547e-05	3.54547e-05	3.54547e-05	3.54547e-05	3.18117e-05	3.18117e-05	3.18117e-05	3.18117e-05	3.18117e-05
1004153	GCA_000211395.2_ASM21139v1_genomic.fna.gz	Escherichia coli AA86	strain=AA86	4983288	7.35266e-05	7.35266e-05	7.35266e-05	7.35266e-05	7.35266e-05	4.4286e-05	4.4286e-05	4.4286e-05	4.4286e-05	4.4286e-05	3.85694e-05	3.85694e-05	3.85694e-05	3.85694e-05	3.85694e-05	3.39568e-05	3.39568e-05	3.39568e-05	3.39568e-05	3.39568e-05	3.04636e-05	3.04636e-05	3.04636e-05	3.04636e-05	3.04636e-05	7.54848e-05	7.54848e-05	7.54848e-05	7.54848e-05	7.54848e-05	4.02611e-05	4.02611e-05	4.02611e-05	4.02611e-05	4.02611e-05	3.54547e-05	3.54547e-05	3.54547e-05	3.54547e-05	3.54547e-05	3.18117e-05	3.18117e-05	3.18117e-05	3.18117e-05	3.18117e-05
1006551	GCA_000240325.1_ASM24032v1_genomic.fna.gz	Klebsiella michiganensis KCTC 1686	strain=KCTC 1686	5974109	0	0	0	0	0	0	0	0	0	0	0	0	0	0	0	0	0	0	0	0	0.00221812	0.00221812	0.00221812	0.00221812	0.00221812	0	0	0	0	0	0	0	0	0	0	0	0	0	0	0	0	0	0	0	0
1028307	GCA_000215745.1_ASM21574v1_genomic.fna.gz	Klebsiella aerogenes KCTC 2190	strain=KCTC 2190	5280350	0	0	0	0	0	0	0	0	0	0	0	0	0	0	0	0	0	0	0	0	0.00203271	0.00203271	0.00203271	0.00203271	0.00203271	0	0	0	0	0	0	0	0	0	0	0	0	0	0	0	0	0	0	0	0
1033813	GCA_000214765.3_ASM21476v3_genomic.fna.gz	Escherichia coli NA114	strain=NA114	5246175	0	0	0	0	0	0	0	0	0	0	3.85694e-05	3.85694e-05	3.85694e-05	3.85694e-05	3.85694e-05	3.39568e-05	3.39568e-05	3.39568e-05	3.39568e-05	3.39568e-05	3.04636e-05	3.04636e-05	3.04636e-05	3.04636e-05	3.04636e-05	0	0	0	0	0	0	0	0	0	0	3.54547e-05	3.54547e-05	3.54547e-05	3.54547e-05	3.54547e-05	3.18117e-05	3.18117e-05	3.18117e-05	3.18117e-05	3.18117e-05
1035817	GCA_000219455.1_ASM21945v1_genomic.fna.gz	Bifidobacterium longum subsp. longum KACC 91563	strain=KACC 91563	2395764	0	0	0	0	0	0.00142207	0.00142207	0.00142207	0.00142207	0.00142207	0.0012385	0.0012385	0.0012385	0.0012385	0.0012385	0.00109039	0.00109039	0.00109039	0.00109039	0.00109039	0.000978221	0.000978221	0.000978221	0.000978221	0.000978221	0	0	0	0	0	0.00226483	0.00226483	0.00226483	0.00226483	0.00226483	0.00199446	0.00199446	0.00199446	0.00199446	0.00199446	0.00178953	0.00178953	0.00178953	0.00178953	0.00178953
1040964	GCA_000217755.2_ASM21775v1_genomic.fna.gz	Lactobacillus ruminis SPM0211	strain=SPM0211	2172227	0	0	0	0	0	0	0	0	0	0	0.00206483	0.00206483	0.00206483	0.00206483	0.00206483	0.00181789	0.00181789	0.00181789	0.00181789	0.00181789	0.00163088	0.00163088	0.00163088	0.00163088	0.00163088	0	0	0	0	0	0	0	0	0	0	0.00173146	0.00173146	0.00173146	0.00173146	0.00173146	0.00155355	0.00155355	0.00155355	0.00155355	0.00155355
1042403	GCA_000220885.1_ASM22088v1_genomic.fna.gz	Bifidobacterium animalis subsp. lactis CNCM I-2494	strain=CNCM I-2494	1943113	0	0	0	0	0	0	0	0	0	0	0	0	0	0	0	0	0	0	0	0	0.000249157	0.000249157	0.000249157	0.000249157	0.000249157	0	0	0	0	0	0	0	0	0	0	0	0	0	0	0	0	0	0	0	0
1042803	GCA_000221065.2_Ecoli.O104_H4.01-09591_1.0_genomic.fna.gz	Escherichia coli O104:H4 str. 01-09591	strain=01-09591	5491589	0	0	0	0	0	0	0	0	0	0	3.85694e-05	3.85694e-05	3.85694e-05	3.85694e-05	3.85694e-05	3.39568e-05	3.39568e-05	3.39568e-05	3.39568e-05	3.39568e-05	3.04636e-05	3.04636e-05	3.04636e-05	3.04636e-05	3.04636e-05	0	0	0	0	0	0	0	0	0	0	3.54547e-05	3.54547e-05	3.54547e-05	3.54547e-05	3.54547e-05	3.18117e-05	3.18117e-05	3.18117e-05	3.18117e-05	3.18117e-05
1045856	GCA_000239975.1_ASM23997v1_genomic.fna.gz	Enterobacter cloacae EcWSU1	strain=EcWSU1	4798091	0	0	0	0	0	0	0	0	0	0	0	0	0	0	0	0	0	0	0	0	0.00176416	0.00176416	0.00176416	0.00176416	0.00176416	0	0	0	0	0	0	0	0	0	0	0	0	0	0	0	0	0	0	0	0
1046629	GCA_000305335.2_ASM30533v2_genomic.fna.gz	Streptococcus salivarius 57.I	strain=57.I	2179563	0	0	0	0	0	0	0	0	0	0	0	0	0	0	0	0	0	0	0	0	0.000721586	0.000721586	0.000721586	0.000721586	0.000721586	0	0	0	0	0	0	0	0	0	0	0	0	0	0	0	0	0	0	0	0
1048254	GCA_000220805.2_Ecoli_C227-11_1.0_genomic.fna.gz	Escherichia coli O104:H4 str. C227-11	strain=C227-11	5542971	0	0	0	0	0	0	0	0	0	0	3.85694e-05	3.85694e-05	3.85694e-05	3.85694e-05	3.85694e-05	3.39568e-05	3.39568e-05	3.39568e-05	3.39568e-05	3.39568e-05	3.04636e-05	3.04636e-05	3.04636e-05	3.04636e-05	3.04636e-05	0	0	0	0	0	0	0	0	0	0	3.54547e-05	3.54547e-05	3.54547e-05	3.54547e-05	3.54547e-05	3.18117e-05	3.18117e-05	3.18117e-05	3.18117e-05	3.18117e-05
1048332	GCA_000253335.1_ASM25333v1_genomic.fna.gz	Streptococcus salivarius CCHSS3	strain=CCHSS3	2217184	0	0	0	0	0	0.00104899	0.00104899	0.00104899	0.00104899	0.00104899	0.000913585	0.000913585	0.000913585	0.000913585	0.000913585	0.000804329	0.000804329	0.000804329	0.000804329	0.000804329	0.000721586	0.000721586	0.000721586	0.000721586	0.000721586	0	0	0	0	0	0.000855182	0.000855182	0.000855182	0.000855182	0.000855182	0.00075309	0.00075309	0.00075309	0.00075309	0.00075309	0.00067571	0.00067571	0.00067571	0.00067571	0.00067571
1048689	GCA_000245515.1_ASM24551v1_genomic.fna.gz	Escherichia coli O55:H7 str. RM12579	strain=RM12579	5448306	0	0	0	0	0	0	0	0	0	0	3.85694e-05	3.85694e-05	3.85694e-05	3.85694e-05	3.85694e-05	3.39568e-05	3.39568e-05	3.39568e-05	3.39568e-05	3.39568e-05	3.04636e-05	3.04636e-05	3.04636e-05	3.04636e-05	3.04636e-05	0	0	0	0	0	0	0	0	0	0	3.54547e-05	3.54547e-05	3.54547e-05	3.54547e-05	3.54547e-05	3.18117e-05	3.18117e-05	3.18117e-05	3.18117e-05	3.18117e-05
1049565	GCA_000220485.1_ASM22048v1_genomic.fna.gz	Klebsiella pneumoniae KCTC 2242	strain=KCTC 2242	5462423	0	0	0	0	0	0	0	0	0	0	0	0	0	0	0	0.000691431	0.000691431	0.000691431	0.000691431	0.000691431	0.000620302	0.000620302	0.000620302	0.000620302	0.000620302	0	0	0	0	0	0	0	0	0	0	0	0	0	0	0	0.000651589	0.000651589	0.000651589	0.000651589	0.000651589
1051074	GCA_000253395.1_ASM25339v1_genomic.fna.gz	Streptococcus thermophilus JIM 8232	strain=JIM 8232	1929905	0	0	0	0	0	0	0	0	0	0	0.00115887	0.00115887	0.00115887	0.00115887	0.00115887	0.00102028	0.00102028	0.00102028	0.00102028	0.00102028	0.000915323	0.000915323	0.000915323	0.000915323	0.000915323	0	0	0	0	0	0	0	0	0	0	0.0010829	0.0010829	0.0010829	0.0010829	0.0010829	0.000971633	0.000971633	0.000971633	0.000971633	0.000971633
1064535	GCA_000283495.2_ASM28349v2_genomic.fna.gz	Megasphaera elsdenii DSM 20460	strain=DSM 20460	2474718	0	0	0	0	0	0	0	0	0	0	0	0	0	0	0	0	0	0	0	0	0.0033647	0.0033647	0.0033647	0.0033647	0.0033647	0	0	0	0	0	0	0	0	0	0	0	0	0	0	0	0	0	0	0	0
1068608	GCA_000226585.1_ASM22658v1_genomic.fna.gz	Escherichia coli XH140A	strain=XH140A	4411216	0	0	0	0	0	0	0	0	0	0	0	0	0	0	0	3.39568e-05	3.39568e-05	3.39568e-05	3.39568e-05	3.39568e-05	3.04636e-05	3.04636e-05	3.04636e-05	3.04636e-05	3.04636e-05	0	0	0	0	0	0	0	0	0	0	0	0	0	0	0	3.18117e-05	3.18117e-05	3.18117e-05	3.18117e-05	3.18117e-05
1069533	GCA_000246835.1_ASM24683v1_genomic.fna.gz	Streptococcus infantarius subsp. infantarius CJ18	strain=CJ18	2008249	0	0	0	0	0	0	0	0	0	0	0	0	0	0	0	0.000291083	0.000291083	0.000291083	0.000291083	0.000291083	0.000261138	0.000261138	0.000261138	0.000261138	0.000261138	0	0	0	0	0	0	0	0	0	0	0	0	0	0	0	0.000262634	0.000262634	0.000262634	0.000262634	0.000262634
1072459	GCA_000227625.1_ASM22762v1_genomic.fna.gz	Escherichia coli O7:K1 str. CE10	strain=CE10	5378729	0	0	0	0	0	0	0	0	0	0	3.85694e-05	3.85694e-05	3.85694e-05	3.85694e-05	3.85694e-05	3.39568e-05	3.39568e-05	3.39568e-05	3.39568e-05	3.39568e-05	3.04636e-05	3.04636e-05	3.04636e-05	3.04636e-05	3.04636e-05	0	0	0	0	0	0	0	0	0	0	3.54547e-05	3.54547e-05	3.54547e-05	3.54547e-05	3.54547e-05	3.18117e-05	3.18117e-05	3.18117e-05	3.18117e-05	3.18117e-05
1075106	GCA_000224965.2_ASM22496v2_genomic.fna.gz	Bifidobacterium animalis subsp. lactis BLC1	strain=BLC1	1938583	0	0	0	0	0	0	0	0	0	0	0	0	0	0	0	0	0	0	0	0	0.000249157	0.000249157	0.000249157	0.000249157	0.000249157	0	0	0	0	0	0	0	0	0	0	0	0	0	0	0	0	0	0	0	0
1125630	GCA_000240185.2_ASM24018v2_genomic.fna.gz	Klebsiella pneumoniae subsp. pneumoniae HS11286	strain=HS11286	5682322	0	0	0	0	0	0.000901755	0.000901755	0.000901755	0.000901755	0.000901755	0.000785352	0.000785352	0.000785352	0.000785352	0.000785352	0.000691431	0.000691431	0.000691431	0.000691431	0.000691431	0.000620302	0.000620302	0.000620302	0.000620302	0.000620302	0	0	0	0	0	0.000824654	0.000824654	0.000824654	0.000824654	0.000824654	0.000726206	0.000726206	0.000726206	0.000726206	0.000726206	0.000651589	0.000651589	0.000651589	0.000651589	0.000651589
1423814	GCA_000159435.1_ASM15943v1_genomic.fna.gz	Lactobacillus vaginalis DSM 5837 = ATCC 49540	strain=ATCC 49540	1877332	0	0	0	0	0	0	0	0	0	0	0	0	0	0	0	0	0	0	0	0	0	0	0	0	0	0	0	0	0	0	0	0	0	0	0	0	0	0	0	0	0	0	0	0	0
[truncated: 205 more columns]

## Sheet: TableS3
sample	class	reads	MeanReadLength	sd MeanReadLength	se MeanReadLentgh	MedianReadLength	pareto	richness	seqdepth
M1_R50_D1	aligned	126955	8062.31	4004.88	11.24	7866	M1	R50	D1
M1_R50_D1	unaligned	8036	3110.84	3205.33	35.7563	1775	M1	R50	D1
M1_R50_D2	aligned	253931	8068.2	4005.99	7.94972	7868	M1	R50	D2
M1_R50_D2	unaligned	16045	3148.82	3358.59	26.5147	1739	M1	R50	D2
M1_R50_D3	aligned	380905	8053.32	3996.88	6.47608	7852	M1	R50	D3
M1_R50_D3	unaligned	24066	3136.89	3344.1	21.5564	1795	M1	R50	D3
M1_R50_D4	aligned	507834	8066.37	3986.93	5.59472	7875	M1	R50	D4
M1_R50_D4	unaligned	32127	3161.41	3253.1	18.1494	1867	M1	R50	D4
M1_R50_D5	aligned	634850	8067.17	3990.12	5.00784	7870	M1	R50	D5
M1_R50_D5	unaligned	40105	3170.61	3260.15	16.2794	1882	M1	R50	D5
M1_R150_D1	aligned	126984	8078.92	4017.14	11.2731	7865	M1	R150	D1
M1_R150_D1	unaligned	8008	3203.27	3288.08	36.7435	1945.5	M1	R150	D1
M1_R150_D2	aligned	253891	8063.62	3989.94	7.91849	7867	M1	R150	D2
M1_R150_D2	unaligned	16086	3136.2	3210.11	25.3102	1807	M1	R150	D2
M1_R150_D3	aligned	380871	8047.69	3996.16	6.47521	7856	M1	R150	D3
M1_R150_D3	unaligned	24103	3159.95	3321.53	21.3945	1846	M1	R150	D3
M1_R150_D4	aligned	507869	8059.21	4001.47	5.61492	7864	M1	R150	D4
M1_R150_D4	unaligned	32094	3171.65	3372.75	18.8266	1821	M1	R150	D4
M1_R150_D5	aligned	634776	8065.56	4003.68	5.02515	7872	M1	R150	D5
M1_R150_D5	unaligned	40177	3158.2	3316.21	16.5445	1836	M1	R150	D5
M1_R250_D1	aligned	126958	8071.63	4023.4	11.2918	7871	M1	R250	D1
M1_R250_D1	unaligned	8008	3146.4	3225.91	36.0487	1839	M1	R250	D1
M1_R250_D2	aligned	253815	8062.15	4001.66	7.94294	7866	M1	R250	D2
M1_R250_D2	unaligned	16110	3118.37	3295.69	25.9656	1769	M1	R250	D2
M1_R250_D3	aligned	380871	8064.26	3999.86	6.48121	7862	M1	R250	D3
M1_R250_D3	unaligned	24136	3172.39	3388.73	21.8124	1844	M1	R250	D3
M1_R250_D4	aligned	507850	8063.56	3989.18	5.59778	7875	M1	R250	D4
M1_R250_D4	unaligned	32128	3172.15	3292.01	18.3662	1839.5	M1	R250	D4
M1_R250_D5	aligned	634727	8066.79	3993.67	5.01278	7874	M1	R250	D5
M1_R250_D5	unaligned	40217	3153.27	3315.62	16.5333	1819	M1	R250	D5
M1_R350_D1	aligned	127026	8054.3	3985.41	11.1822	7868	M1	R350	D1
M1_R350_D1	unaligned	8001	3161.92	3289.39	36.7742	1892	M1	R350	D1
M1_R350_D2	aligned	253836	8072.75	4007.65	7.95451	7871.5	M1	R350	D2
M1_R350_D2	unaligned	16126	3186.53	3346.66	26.3541	1857.5	M1	R350	D2
M1_R350_D3	aligned	380905	8060.08	4006.87	6.49228	7857	M1	R350	D3
M1_R350_D3	unaligned	24101	3180.65	3402.56	21.9173	1833	M1	R350	D3
M1_R350_D4	aligned	507763	8073.84	3988.8	5.59773	7879	M1	R350	D4
M1_R350_D4	unaligned	32155	3197.56	3443.76	19.2048	1865	M1	R350	D4
M1_R350_D5	aligned	634815	8065.69	3995.73	5.01502	7873	M1	R350	D5
M1_R350_D5	unaligned	40145	3155.19	3351.72	16.7283	1803	M1	R350	D5
M1_R450_D1	aligned	126974	8038.55	3960.99	11.116	7871	M1	R450	D1
M1_R450_D1	unaligned	8011	3184.28	3314.94	37.0367	1896	M1	R450	D1
M1_R450_D2	aligned	253936	8069.52	3997.37	7.93254	7875	M1	R450	D2
M1_R450_D2	unaligned	16013	3222.77	3420.74	27.0323	1898	M1	R450	D2
M1_R450_D3	aligned	380778	8062.7	4008.53	6.49605	7868	M1	R450	D3
M1_R450_D3	unaligned	24152	3154.09	3256.36	20.9535	1842.5	M1	R450	D3
M1_R450_D4	aligned	507773	8063.33	3985.42	5.59292	7869	M1	R450	D4
M1_R450_D4	unaligned	32129	3153.41	3307.99	18.4551	1811	M1	R450	D4
M1_R450_D5	aligned	634836	8073.58	3993.96	5.01271	7879	M1	R450	D5
M1_R450_D5	unaligned	40166	3168.5	3319.61	16.5637	1837	M1	R450	D5
M2_R50_D1	aligned	126961	8066.47	4014.48	11.2666	7857	M2	R50	D1
M2_R50_D1	unaligned	8025	3190.3	3294.95	36.7813	1947	M2	R50	D1
M2_R50_D2	aligned	253934	8063.46	3986.73	7.91145	7865	M2	R50	D2
M2_R50_D2	unaligned	16038	3135.19	3297.98	26.0419	1772	M2	R50	D2
M2_R50_D3	aligned	380885	8060.87	3995.96	6.47477	7868	M2	R50	D3
M2_R50_D3	unaligned	24092	3151.46	3297.91	21.2473	1854	M2	R50	D3
M2_R50_D4	aligned	507856	8067.19	3993.3	5.60353	7871	M2	R50	D4
M2_R50_D4	unaligned	32105	3151.12	3318.12	18.5185	1821	M2	R50	D4
M2_R50_D5	aligned	634819	8060.65	3992.14	5.0105	7872	M2	R50	D5
M2_R50_D5	unaligned	40130	3180.48	3388.57	16.9154	1873	M2	R50	D5
M2_R150_D1	aligned	126936	8046.92	3992.39	11.2057	7863	M2	R150	D1
M2_R150_D1	unaligned	8032	3226.83	3343.72	37.3094	1942	M2	R150	D1
M2_R150_D2	aligned	253887	8051.44	4001.99	7.94247	7859	M2	R150	D2
M2_R150_D2	unaligned	16092	3160.84	3483.76	27.4627	1800	M2	R150	D2
M2_R150_D3	aligned	380840	8060.35	3979.13	6.44788	7873	M2	R150	D3
M2_R150_D3	unaligned	24115	3156.74	3305.81	21.2879	1841	M2	R150	D3
M2_R150_D4	aligned	507844	8065.08	4000.03	5.61304	7867	M2	R150	D4
M2_R150_D4	unaligned	32124	3185.58	3390.92	18.9192	1844.5	M2	R150	D4
M2_R150_D5	aligned	634766	8062.59	4010.34	5.03355	7863	M2	R150	D5
M2_R150_D5	unaligned	40178	3174.65	3319.8	16.5622	1841.5	M2	R150	D5
M2_R250_D1	aligned	127011	8069.57	4012.72	11.2595	7866	M2	R250	D1
M2_R250_D1	unaligned	8006	3158.88	3322.08	37.1281	1807	M2	R250	D1
M2_R250_D2	aligned	253889	8053.86	3979.74	7.89828	7861	M2	R250	D2
M2_R250_D2	unaligned	16128	3151.13	3289.45	25.902	1837.5	M2	R250	D2
M2_R250_D3	aligned	380770	8060	3988.86	6.46424	7867	M2	R250	D3
M2_R250_D3	unaligned	24169	3151.01	3307.5	21.275	1836	M2	R250	D3
M2_R250_D4	aligned	507841	8067.2	3992.72	5.60279	7873	M2	R250	D4
M2_R250_D4	unaligned	32101	3162.55	3360.45	18.7559	1803	M2	R250	D4
M2_R250_D5	aligned	634810	8061.4	3989.84	5.00765	7871	M2	R250	D5
M2_R250_D5	unaligned	40141	3139.14	3314.71	16.5444	1789	M2	R250	D5
M2_R350_D1	aligned	126960	8079.81	4005.76	11.2422	7888	M2	R350	D1
M2_R350_D1	unaligned	8001	3160.76	3356	37.5189	1830	M2	R350	D1
M2_R350_D2	aligned	253918	8062.67	4004.12	7.94622	7864	M2	R350	D2
M2_R350_D2	unaligned	16100	3175.04	3365.17	26.5212	1857	M2	R350	D2
M2_R350_D3	aligned	380840	8075.56	4005.45	6.49053	7873	M2	R350	D3
M2_R350_D3	unaligned	24147	3139.31	3330.77	21.4345	1800	M2	R350	D3
M2_R350_D4	aligned	507767	8057.69	3984.24	5.5913	7863	M2	R350	D4
M2_R350_D4	unaligned	32182	3157.41	3331	18.5681	1784	M2	R350	D4
M2_R350_D5	aligned	634718	8062.42	3992.23	5.01101	7872	M2	R350	D5
M2_R350_D5	unaligned	40179	3183.15	3344.51	16.6853	1871	M2	R350	D5
M2_R450_D1	aligned	126997	8063.72	4001.44	11.2284	7866	M2	R450	D1
M2_R450_D1	unaligned	8015	3146.18	3358.94	37.5189	1775	M2	R450	D1
M2_R450_D2	aligned	254003	8056.81	3983.61	7.9042	7872	M2	R450	D2
M2_R450_D2	unaligned	16006	3147.94	3257.1	25.7448	1811	M2	R450	D2
M2_R450_D3	aligned	380862	8059.62	3986.2	6.45915	7867	M2	R450	D3
M2_R450_D3	unaligned	24145	3136.07	3264.56	21.0093	1813	M2	R450	D3
M2_R450_D4	aligned	507805	8064.62	3992.79	5.60309	7873	M2	R450	D4
M2_R450_D4	unaligned	32188	3179.35	3384.97	18.8672	1832.5	M2	R450	D4
M2_R450_D5	aligned	634837	8074.23	3998.59	5.01852	7878	M2	R450	D5
M2_R450_D5	unaligned	40167	3176.98	3329.73	16.614	1844	M2	R450	D5
M3_R50_D1	aligned	126962	8061.58	3981.55	11.1742	7868	M3	R50	D1
M3_R50_D1	unaligned	8030	3181.42	3462.53	38.6398	1799	M3	R50	D1
M3_R50_D2	aligned	253929	8054.2	3997.53	7.93297	7859	M3	R50	D2
M3_R50_D2	unaligned	16051	3143.12	3298.96	26.0391	1793	M3	R50	D2
M3_R50_D3	aligned	380862	8069.83	3996.18	6.47531	7876	M3	R50	D3
M3_R50_D3	unaligned	24100	3215.31	3378.4	21.7622	1900.5	M3	R50	D3
M3_R50_D4	aligned	507868	8058.82	3988.49	5.59671	7874	M3	R50	D4
M3_R50_D4	unaligned	32088	3149.48	3315.57	18.5092	1815	M3	R50	D4
M3_R50_D5	aligned	634812	8066.86	4007.2	5.02942	7872	M3	R50	D5
M3_R50_D5	unaligned	40131	3166.49	3344.52	16.6953	1842	M3	R50	D5
M3_R150_D1	aligned	126996	8073.45	3975.39	11.1554	7890	M3	R150	D1
M3_R150_D1	unaligned	8008	3134.79	3279.69	36.6498	1843.5	M3	R150	D1
M3_R150_D2	aligned	253937	8048.06	3987.53	7.913	7859	M3	R150	D2
M3_R150_D2	unaligned	16061	3157.15	3268.68	25.7921	1797	M3	R150	D2
M3_R150_D3	aligned	380901	8052.71	3984.51	6.45608	7862	M3	R150	D3
M3_R150_D3	unaligned	24058	3147.24	3302.88	21.2943	1826	M3	R150	D3
M3_R150_D4	aligned	507829	8056.6	3997.4	5.60943	7865	M3	R150	D4
M3_R150_D4	unaligned	32121	3185.68	3374.46	18.8283	1832	M3	R150	D4
M3_R150_D5	aligned	634813	8069.48	3993.78	5.01258	7870	M3	R150	D5
M3_R150_D5	unaligned	40143	3168.83	3434.04	17.1396	1849	M3	R150	D5
M3_R250_D1	aligned	127053	8059.56	4006.08	11.239	7864	M3	R250	D1
M3_R250_D1	unaligned	7991	3127.14	3217.01	35.9875	1828	M3	R250	D1
M3_R250_D2	aligned	253892	8064.09	3980.78	7.9003	7869	M3	R250	D2
M3_R250_D2	unaligned	16075	3179.97	3403.27	26.8423	1876	M3	R250	D2
M3_R250_D3	aligned	380924	8054.4	3995.19	6.47319	7858	M3	R250	D3
M3_R250_D3	unaligned	24084	3164.56	3362.77	21.6687	1851.5	M3	R250	D3
M3_R250_D4	aligned	507773	8057.87	3989.85	5.59915	7871	M3	R250	D4
M3_R250_D4	unaligned	32172	3150.34	3311.05	18.4598	1809	M3	R250	D4
M3_R250_D5	aligned	634819	8050.72	3997.35	5.01703	7856	M3	R250	D5
M3_R250_D5	unaligned	40165	3169.89	3380.21	16.8663	1809	M3	R250	D5
M3_R350_D1	aligned	127037	8059.03	3992.8	11.2024	7875	M3	R350	D1
M3_R350_D1	unaligned	8008	3141.87	3173.76	35.466	1853.5	M3	R350	D1
M3_R350_D2	aligned	253826	8063.97	4017.15	7.97352	7868	M3	R350	D2
M3_R350_D2	unaligned	16125	3168.55	3331.67	26.2369	1861	M3	R350	D2
M3_R350_D3	aligned	380898	8069.15	4001.28	6.48327	7874	M3	R350	D3
M3_R350_D3	unaligned	24093	3190.71	3380.37	21.778	1841	M3	R350	D3
M3_R350_D4	aligned	507809	8063.52	3997.24	5.60932	7873	M3	R350	D4
M3_R350_D4	unaligned	32094	3172.8	3376.71	18.8487	1830	M3	R350	D4
M3_R350_D5	aligned	634710	8060.35	3986.2	5.00347	7866	M3	R350	D5
M3_R350_D5	unaligned	40246	3148.9	3242.69	16.1638	1812	M3	R350	D5
M3_R450_D1	aligned	127026	8065.42	3970.19	11.1395	7877	M3	R450	D1
M3_R450_D1	unaligned	7988	3227.47	3361.85	37.6148	1957.5	M3	R450	D1
M3_R450_D2	aligned	253869	8071.67	4014.95	7.96847	7876	M3	R450	D2
M3_R450_D2	unaligned	16119	3174.61	3310.13	26.0721	1832	M3	R450	D2
M3_R450_D3	aligned	380883	8064.62	3996.5	6.47565	7864	M3	R450	D3
M3_R450_D3	unaligned	24116	3123.97	3263.47	21.0149	1808	M3	R450	D3
M3_R450_D4	aligned	507883	8063.78	3994.06	5.60445	7870	M3	R450	D4
M3_R450_D4	unaligned	32112	3183.49	3351.51	18.7028	1876.5	M3	R450	D4
M3_R450_D5	aligned	634842	8067.21	3997.23	5.01679	7875	M3	R450	D5
M3_R450_D5	unaligned	40151	3169.48	3436.97	17.1525	1820	M3	R450	D5
M4_R50_D1	aligned	126959	8092.52	4012.22	11.2604	7895	M4	R50	D1
M4_R50_D1	unaligned	8031	3232.57	3466.05	38.6768	1955	M4	R50	D1
M4_R50_D2	aligned	253943	8066.41	4014.55	7.96652	7865	M4	R50	D2
M4_R50_D2	unaligned	16039	3176.04	3374.34	26.6441	1828	M4	R50	D2
M4_R50_D3	aligned	380892	8069.68	3994.85	6.47291	7873	M4	R50	D3
M4_R50_D3	unaligned	24077	3227.52	3467.62	22.3476	1885	M4	R50	D3
M4_R50_D4	aligned	507850	8073.53	3996.67	5.6083	7886	M4	R50	D4
M4_R50_D4	unaligned	32110	3181.07	3454.29	19.277	1797.5	M4	R50	D4
M4_R50_D5	aligned	634806	8061.19	4000.94	5.0216	7860	M4	R50	D5
M4_R50_D5	unaligned	40147	3177.39	3334.49	16.6419	1873	M4	R50	D5
M4_R150_D1	aligned	126950	8059.79	3998.9	11.2234	7877	M4	R150	D1
M4_R150_D1	unaligned	8022	3188.29	3391.14	37.8621	1861	M4	R150	D1
M4_R150_D2	aligned	253904	8055.6	3987.57	7.91359	7860	M4	R150	D2
M4_R150_D2	unaligned	16091	3196.44	3371.51	26.5787	1851	M4	R150	D2
M4_R150_D3	aligned	380873	8063.24	3980.7	6.45014	7875	M4	R150	D3
M4_R150_D3	unaligned	24090	3145.58	3315.96	21.3644	1806.5	M4	R150	D3
M4_R150_D4	aligned	507847	8054.48	3997.06	5.60886	7860	M4	R150	D4
M4_R150_D4	unaligned	32094	3136.45	3330.1	18.5885	1779	M4	R150	D4
M4_R150_D5	aligned	634781	8063.67	3991.38	5.00969	7868	M4	R150	D5
M4_R150_D5	unaligned	40197	3175.08	3326.18	16.5901	1835	M4	R150	D5
M4_R250_D1	aligned	127001	8051.19	4013.12	11.261	7855	M4	R250	D1
M4_R250_D1	unaligned	8013	3150.16	3449	38.5297	1809	M4	R250	D1
M4_R250_D2	aligned	253817	8070.08	4002.44	7.94447	7872	M4	R250	D2
M4_R250_D2	unaligned	16115	3206.06	3507.12	27.6271	1813	M4	R250	D2
M4_R250_D3	aligned	380841	8064.93	3989.44	6.46457	7875	M4	R250	D3
M4_R250_D3	unaligned	24118	3163.08	3348.96	21.5645	1797	M4	R250	D3
M4_R250_D4	aligned	507809	8068.01	4000.79	5.6143	7874	M4	R250	D4
M4_R250_D4	unaligned	32168	3156.44	3291.66	18.3528	1848.5	M4	R250	D4
M4_R250_D5	aligned	634822	8062.03	3999.51	5.01974	7861	M4	R250	D5
M4_R250_D5	unaligned	40171	3195.1	3320.32	16.5662	1854	M4	R250	D5
M4_R350_D1	aligned	126955	8064.53	4011.3	11.258	7864	M4	R350	D1
M4_R350_D1	unaligned	8009	3226.64	3414.84	38.1576	1950	M4	R350	D1
M4_R350_D2	aligned	253937	8061.84	4013.25	7.96403	7865	M4	R350	D2
M4_R350_D2	unaligned	16099	3181.26	3431.56	27.0453	1820	M4	R350	D2
M4_R350_D3	aligned	380903	8054.57	3982.47	6.45276	7865	M4	R350	D3
M4_R350_D3	unaligned	24116	3163.53	3441.07	22.1585	1809.5	M4	R350	D3
M4_R350_D4	aligned	507829	8074.08	3999.5	5.61238	7875	M4	R350	D4
M4_R350_D4	unaligned	32121	3192.11	3309.32	18.4648	1864	M4	R350	D4
M4_R350_D5	aligned	634756	8068.54	3995.72	5.01524	7872	M4	R350	D5
M4_R350_D5	unaligned	40160	3174.5	3386.59	16.8992	1816	M4	R350	D5
M4_R450_D1	aligned	127003	8065.77	4008.8	11.2488	7861	M4	R450	D1
M4_R450_D1	unaligned	8005	3227.78	3356.6	37.5163	1966	M4	R450	D1
M4_R450_D2	aligned	254003	8074.65	3996.65	7.93007	7885	M4	R450	D2
M4_R450_D2	unaligned	16021	3219.39	3359.15	26.539	1935	M4	R450	D2
M4_R450_D3	aligned	380879	8082.98	4009.98	6.49754	7882	M4	R450	D3
M4_R450_D3	unaligned	24139	3154.24	3362.79	21.6441	1821	M4	R450	D3
M4_R450_D4	aligned	507843	8061.11	3995.97	5.60735	7871	M4	R450	D4
M4_R450_D4	unaligned	32164	3168.18	3292.41	18.3582	1885.5	M4	R450	D4
M4_R450_D5	aligned	634746	8059.05	3993.4	5.01237	7860	M4	R450	D5
M4_R450_D5	unaligned	40143	3174.48	3287.1	16.4062	1866	M4	R450	D5
M5_R50_D1	aligned	126941	8073.41	4012.42	11.2617	7878	M5	R50	D1
M5_R50_D1	unaligned	8044	3138.57	3263.53	36.3875	1866.5	M5	R50	D1
M5_R50_D2	aligned	253920	8064.95	3992.18	7.92248	7867	M5	R50	D2
M5_R50_D2	unaligned	16058	3150.39	3287.32	25.9416	1796	M5	R50	D2
M5_R50_D3	aligned	380874	8058.67	4003.96	6.48782	7859	M5	R50	D3
M5_R50_D3	unaligned	24090	3162.28	3418.72	22.0265	1823	M5	R50	D3
M5_R50_D4	aligned	507907	8060.61	3986.79	5.59412	7872	M5	R50	D4
M5_R50_D4	unaligned	32052	3157.48	3314.14	18.5116	1816	M5	R50	D4
M5_R50_D5	aligned	634801	8056.86	3989.66	5.00746	7860	M5	R50	D5
M5_R50_D5	unaligned	40144	3188.77	3327.41	16.6072	1873	M5	R50	D5
M5_R150_D1	aligned	126977	8064.15	3997.78	11.2191	7864	M5	R150	D1
M5_R150_D1	unaligned	8020	3181.22	3264.38	36.4513	1934.5	M5	R150	D1
M5_R150_D2	aligned	253905	8068.88	3994.61	7.92754	7869	M5	R150	D2
M5_R150_D2	unaligned	16080	3191.93	3362.88	26.5197	1866	M5	R150	D2
M5_R150_D3	aligned	380862	8055.34	3983.76	6.4552	7865	M5	R150	D3
M5_R150_D3	unaligned	24127	3168.29	3344.86	21.5341	1839	M5	R150	D3
M5_R150_D4	aligned	507880	8066.02	4014.15	5.63265	7864	M5	R150	D4
M5_R150_D4	unaligned	32105	3170.39	3386.44	18.8998	1805	M5	R150	D4
M5_R150_D5	aligned	634742	8064.79	3999.89	5.02052	7871	M5	R150	D5
M5_R150_D5	unaligned	40175	3197.47	3365.4	16.7903	1901	M5	R150	D5
M5_R250_D1	aligned	126959	8068.33	3989.9	11.1977	7883	M5	R250	D1
M5_R250_D1	unaligned	8011	3180.55	3413.86	38.1419	1773	M5	R250	D1
M5_R250_D2	aligned	253826	8071.19	3982.42	7.90459	7866	M5	R250	D2
M5_R250_D2	unaligned	16120	3163.35	3274.57	25.7912	1847	M5	R250	D2
M5_R250_D3	aligned	380802	8065.37	4000.03	6.48208	7867	M5	R250	D3
M5_R250_D3	unaligned	24115	3159.02	3357.48	21.6207	1815	M5	R250	D3
M5_R250_D4	aligned	507872	8051.94	3983.83	5.59016	7864	M5	R250	D4
M5_R250_D4	unaligned	32125	3179.95	3350.84	18.6953	1871	M5	R250	D4
M5_R250_D5	aligned	634740	8049.59	3978.11	4.9932	7862	M5	R250	D5
M5_R250_D5	unaligned	40220	3173.48	3350.85	16.7084	1836	M5	R250	D5
M5_R350_D1	aligned	127030	8051.53	4011.9	11.2563	7855	M5	R350	D1
M5_R350_D1	unaligned	8007	3192.82	3321.67	37.1212	1861	M5	R350	D1
M5_R350_D2	aligned	253818	8074.97	3982.21	7.90429	7880	M5	R350	D2
M5_R350_D2	unaligned	16132	3176.92	3349.78	26.3738	1839	M5	R350	D2
M5_R350_D3	aligned	380851	8057.74	4002.9	6.48629	7864	M5	R350	D3
M5_R350_D3	unaligned	24138	3155.07	3342.78	21.5158	1802	M5	R350	D3
M5_R350_D4	aligned	507758	8063.21	3978	5.5826	7875	M5	R350	D4
M5_R350_D4	unaligned	32156	3161.82	3310.96	18.4639	1823	M5	R350	D4
M5_R350_D5	aligned	634750	8058.08	3999.2	5.01963	7867	M5	R350	D5
M5_R350_D5	unaligned	40196	3135.78	3292.24	16.421	1794.5	M5	R350	D5
M5_R450_D1	aligned	126984	8074.47	3975.08	11.155	7889	M5	R450	D1
M5_R450_D1	unaligned	7997	3141.64	3245.32	36.2906	1901	M5	R450	D1
M5_R450_D2	aligned	253918	8065.16	4006.1	7.95015	7868	M5	R450	D2
M5_R450_D2	unaligned	16027	3173.14	3339.59	26.3795	1890	M5	R450	D2
M5_R450_D3	aligned	380796	8054.52	3997.96	6.47876	7867	M5	R450	D3
M5_R450_D3	unaligned	24108	3188.41	3333.87	21.4718	1851.5	M5	R450	D3
M5_R450_D4	aligned	507834	8062.16	3989.04	5.59767	7868	M5	R450	D4
M5_R450_D4	unaligned	32157	3151.89	3288.59	18.3388	1819	M5	R450	D4
M5_R450_D5	aligned	634794	8058.95	3987.27	5.00449	7862	M5	R450	D5
M5_R450_D5	unaligned	40195	3184.59	3351.37	16.7161	1867	M5	R450	D5
M6_R50_D1	aligned	126975	8041.15	3997.52	11.2184	7839	M6	R50	D1
M6_R50_D1	unaligned	8007	3124.06	3328.42	37.1966	1706	M6	R50	D1
M6_R50_D2	aligned	253923	8067.45	3963.29	7.8651	7876	M6	R50	D2
M6_R50_D2	unaligned	16056	3172.63	3294.21	25.9975	1870	M6	R50	D2
M6_R50_D3	aligned	380906	8056.45	3991.99	6.46815	7863	M6	R50	D3
M6_R50_D3	unaligned	24056	3191.86	3395.22	21.8905	1848.5	M6	R50	D3
M6_R50_D4	aligned	507887	8065.52	3999.68	5.61231	7870	M6	R50	D4
M6_R50_D4	unaligned	32068	3155.59	3370.07	18.8193	1842	M6	R50	D4
M6_R50_D5	aligned	634830	8059.35	3981.45	4.99704	7872	M6	R50	D5
M6_R50_D5	unaligned	40111	3179.48	3345.83	16.706	1868	M6	R50	D5
M6_R150_D1	aligned	126961	8053.42	3970.72	11.1438	7863	M6	R150	D1
M6_R150_D1	unaligned	8018	3168.75	3423.08	38.2282	1837	M6	R150	D1
M6_R150_D2	aligned	253897	8077.17	4017.28	7.97266	7878	M6	R150	D2
M6_R150_D2	unaligned	16061	3174.64	3354.5	26.4693	1843	M6	R150	D2
M6_R150_D3	aligned	380852	8059.56	3977.91	6.4458	7868	M6	R150	D3
M6_R150_D3	unaligned	24100	3167.15	3341.15	21.5222	1827	M6	R150	D3
M6_R150_D4	aligned	507858	8066.09	4003.22	5.61744	7870	M6	R150	D4
M6_R150_D4	unaligned	32117	3174.63	3410.45	19.0303	1853	M6	R150	D4
M6_R150_D5	aligned	634805	8062.57	3994.59	5.01363	7866	M6	R150	D5
M6_R150_D5	unaligned	40150	3182.91	3330.19	16.6198	1888	M6	R150	D5
M6_R250_D1	aligned	126981	8086.78	3997.08	11.2169	7881	M6	R250	D1
M6_R250_D1	unaligned	8021	3224.04	3292.67	36.7649	1960	M6	R250	D1
M6_R250_D2	aligned	253976	8063.14	4000.34	7.93781	7868	M6	R250	D2
M6_R250_D2	unaligned	16017	3191.32	3259.04	25.7513	1915	M6	R250	D2
M6_R250_D3	aligned	380847	8052.21	3971.03	6.43469	7864	M6	R250	D3
M6_R250_D3	unaligned	24145	3148.71	3418.19	21.998	1838	M6	R250	D3
M6_R250_D4	aligned	507794	8061.95	4000.51	5.61399	7866	M6	R250	D4
M6_R250_D4	unaligned	32197	3194.49	3389.82	18.8916	1875	M6	R250	D4
M6_R250_D5	aligned	634802	8064.57	4006.69	5.02882	7867	M6	R250	D5
M6_R250_D5	unaligned	40181	3154.06	3347.34	16.699	1809	M6	R250	D5
M6_R350_D1	aligned	126994	8085.59	4020.02	11.2807	7885	M6	R350	D1
M6_R350_D1	unaligned	8037	3152.97	3262.53	36.3922	1884	M6	R350	D1
M6_R350_D2	aligned	253895	8054.86	4006.22	7.95074	7855	M6	R350	D2
M6_R350_D2	unaligned	16021	3173.86	3328.87	26.2998	1845	M6	R350	D2
M6_R350_D3	aligned	380897	8064.83	3988.04	6.46183	7874	M6	R350	D3
M6_R350_D3	unaligned	24059	3198.79	3460.62	22.3108	1857	M6	R350	D3
M6_R350_D4	aligned	507785	8059.95	3993.47	5.60416	7867	M6	R350	D4
M6_R350_D4	unaligned	32180	3161.42	3349.17	18.67	1829	M6	R350	D4
M6_R350_D5	aligned	634836	8065.54	3995.18	5.01424	7868	M6	R350	D5
M6_R350_D5	unaligned	40147	3156.5	3345.19	16.6953	1799	M6	R350	D5
M6_R450_D1	aligned	127029	8048.67	4002.51	11.23	7851	M6	R450	D1
M6_R450_D1	unaligned	7995	3208.52	3286.37	36.7542	1926	M6	R450	D1
M6_R450_D2	aligned	253944	8067.76	3993	7.92375	7879	M6	R450	D2
M6_R450_D2	unaligned	16024	3202.61	3377.85	26.6842	1844.5	M6	R450	D2
M6_R450_D3	aligned	380951	8055.46	3993.15	6.46966	7860	M6	R450	D3
M6_R450_D3	unaligned	24053	3179.87	3315.55	21.3782	1860	M6	R450	D3
M6_R450_D4	aligned	507740	8070.36	4001.77	5.61606	7875	M6	R450	D4
M6_R450_D4	unaligned	32179	3169.33	3340.28	18.6207	1846	M6	R450	D4
M6_R450_D5	aligned	634723	8066.66	3997.27	5.01732	7867	M6	R450	D5
M6_R450_D5	unaligned	40224	3163.19	3349.81	16.7023	1833.5	M6	R450	D5
M7_R50_D1	aligned	126953	8054.16	3987.58	11.1915	7850	M7	R50	D1
M7_R50_D1	unaligned	8036	3186.19	3267.86	36.4539	1885.5	M7	R50	D1
M7_R50_D2	aligned	253949	8070.25	3996.52	7.93064	7873	M7	R50	D2
M7_R50_D2	unaligned	16036	3170	3304.72	26.0968	1859.5	M7	R50	D2
M7_R50_D3	aligned	380902	8066.66	4009.76	6.49698	7858	M7	R50	D3
M7_R50_D3	unaligned	24072	3132.12	3318.54	21.3891	1793.5	M7	R50	D3
M7_R50_D4	aligned	507865	8068.1	4013.51	5.63184	7870	M7	R50	D4
M7_R50_D4	unaligned	32096	3166.95	3391.41	18.9302	1847	M7	R50	D4
M7_R50_D5	aligned	634788	8062.64	3995.09	5.01432	7873	M7	R50	D5
M7_R50_D5	unaligned	40153	3135.18	3285.32	16.3953	1809	M7	R50	D5
M7_R150_D1	aligned	126988	8055	3995.94	11.2134	7859	M7	R150	D1
M7_R150_D1	unaligned	8024	3212.4	3407.42	38.0391	1897	M7	R150	D1
M7_R150_D2	aligned	253891	8070.53	4009.38	7.95707	7873	M7	R150	D2
M7_R150_D2	unaligned	16093	3165.27	3296	25.9818	1806	M7	R150	D2
M7_R150_D3	aligned	380881	8066.68	4005.66	6.49052	7867	M7	R150	D3
M7_R150_D3	unaligned	24097	3171.53	3345.05	21.5487	1812	M7	R150	D3
M7_R150_D4	aligned	507839	8059.61	4003.32	5.61768	7867	M7	R150	D4
M7_R150_D4	unaligned	32111	3159.28	3407.85	19.0175	1811	M7	R150	D4
M7_R150_D5	aligned	634772	8061.78	3991.66	5.01007	7865	M7	R150	D5
M7_R150_D5	unaligned	40191	3185.9	3350.11	16.7107	1862	M7	R150	D5
M7_R250_D1	aligned	126995	8066.88	4023	11.289	7872	M7	R250	D1
M7_R250_D1	unaligned	8001	3187.01	3413.11	38.1574	1806	M7	R250	D1
M7_R250_D2	aligned	253893	8072.47	4001.16	7.94072	7875	M7	R250	D2
M7_R250_D2	unaligned	16113	3148	3285.6	25.8837	1798	M7	R250	D2
M7_R250_D3	aligned	380869	8063.99	3989.49	6.46441	7871	M7	R250	D3
M7_R250_D3	unaligned	24123	3141.51	3349.01	21.5626	1815	M7	R250	D3
M7_R250_D4	aligned	507855	8062.86	3998.84	5.61131	7865	M7	R250	D4
M7_R250_D4	unaligned	32125	3179.15	3323.07	18.5404	1856	M7	R250	D4
M7_R250_D5	aligned	634889	8059.89	3999.53	5.0195	7865	M7	R250	D5
M7_R250_D5	unaligned	40104	3178.65	3416.03	17.058	1853	M7	R250	D5
M7_R350_D1	aligned	126939	8054.05	3994.79	11.2124	7862	M7	R350	D1
M7_R350_D1	unaligned	8006	3182.24	3240.5	36.2163	1888.5	M7	R350	D1
M7_R350_D2	aligned	253857	8063.09	4001.92	7.9428	7874	M7	R350	D2
M7_R350_D2	unaligned	16141	3185.71	3372.41	26.5446	1845	M7	R350	D2
M7_R350_D3	aligned	380799	8067.3	3999.15	6.48067	7869	M7	R350	D3
M7_R350_D3	unaligned	24145	3155.62	3305.86	21.2751	1833	M7	R350	D3
M7_R350_D4	aligned	507852	8069.13	4001.39	5.61491	7869	M7	R350	D4
M7_R350_D4	unaligned	32155	3169.22	3364.7	18.7638	1825	M7	R350	D4
M7_R350_D5	aligned	634778	8058.05	3992.47	5.01107	7866	M7	R350	D5
M7_R350_D5	unaligned	40165	3179.88	3393.76	16.9339	1829	M7	R350	D5
M7_R450_D1	aligned	126975	8067.19	3999.9	11.2251	7876	M7	R450	D1
M7_R450_D1	unaligned	8013	3142.82	3251.73	36.3259	1780	M7	R450	D1
M7_R450_D2	aligned	253963	8070.75	3999.68	7.9367	7867	M7	R450	D2
M7_R450_D2	unaligned	15997	3110.66	3310.75	26.1762	1799	M7	R450	D2
M7_R450_D3	aligned	380825	8079.32	4005.01	6.48994	7882	M7	R450	D3
M7_R450_D3	unaligned	24132	3170.6	3421.17	22.0231	1784.5	M7	R450	D3
M7_R450_D4	aligned	507831	8062.68	4002.53	5.61661	7864	M7	R450	D4
M7_R450_D4	unaligned	32149	3185.54	3376.44	18.8311	1862	M7	R450	D4
M7_R450_D5	aligned	634785	8052.62	3987.61	5.00495	7858	M7	R450	D5
M7_R450_D5	unaligned	40173	3158.62	3336.53	16.6467	1821	M7	R450	D5
M8_R50_D1	aligned	126960	8059.92	3999.87	11.2257	7873	M8	R50	D1
M8_R50_D1	unaligned	8027	3115.1	3270.88	36.508	1777	M8	R50	D1
M8_R50_D2	aligned	253924	8058.86	3991.37	7.92082	7859	M8	R50	D2
M8_R50_D2	unaligned	16047	3161.08	3325.9	26.255	1831	M8	R50	D2
M8_R50_D3	aligned	380863	8059.75	4000	6.48151	7864	M8	R50	D3
M8_R50_D3	unaligned	24098	3206.01	3401.95	21.9148	1882	M8	R50	D3
M8_R50_D4	aligned	507838	8058.6	3995.49	5.6067	7862	M8	R50	D4
M8_R50_D4	unaligned	32119	3165.49	3326.88	18.5634	1854	M8	R50	D4
M8_R50_D5	aligned	634865	8060.76	4003.54	5.02462	7862	M8	R50	D5
M8_R50_D5	unaligned	40084	3166.97	3360.41	16.7844	1829	M8	R50	D5
M8_R150_D1	aligned	126966	8065.7	3985.07	11.1839	7870.5	M8	R150	D1
M8_R150_D1	unaligned	8031	3151.57	3240.72	36.1624	1836	M8	R150	D1
M8_R150_D2	aligned	253901	8066.52	3998.77	7.93586	7876	M8	R150	D2
M8_R150_D2	unaligned	16081	3177.71	3246.52	25.6012	1846	M8	R150	D2
M8_R150_D3	aligned	380858	8061.41	4006.87	6.49267	7858	M8	R150	D3
M8_R150_D3	unaligned	24113	3162.99	3398.7	21.8871	1822	M8	R150	D3
M8_R150_D4	aligned	507838	8068.39	4006.87	5.62268	7870	M8	R150	D4
M8_R150_D4	unaligned	32111	3155.82	3358.05	18.7396	1809	M8	R150	D4
M8_R150_D5	aligned	634782	8059.07	4006.36	5.02849	7867	M8	R150	D5
M8_R150_D5	unaligned	40164	3187.53	3370.24	16.8168	1861	M8	R150	D5
M8_R250_D1	aligned	126932	8057.36	3987.32	11.1917	7869	M8	R250	D1
M8_R250_D1	unaligned	8002	3148.33	3254.42	36.381	1886	M8	R250	D1
M8_R250_D2	aligned	253860	8074.86	3994.54	7.92811	7879	M8	R250	D2
M8_R250_D2	unaligned	16128	3210.15	3364.37	26.4919	1895	M8	R250	D2
M8_R250_D3	aligned	380810	8071.32	4002.73	6.48638	7869	M8	R250	D3
M8_R250_D3	unaligned	24120	3146.31	3351.4	21.5793	1797.5	M8	R250	D3
M8_R250_D4	aligned	507876	8068.31	4010.53	5.6276	7873	M8	R250	D4
M8_R250_D4	unaligned	32106	3157.97	3338.54	18.6321	1829.5	M8	R250	D4
M8_R250_D5	aligned	634750	8064.23	4005.13	5.02707	7870	M8	R250	D5
M8_R250_D5	unaligned	40164	3188.67	3365.14	16.7913	1879	M8	R250	D5
M8_R350_D1	aligned	126959	8068.12	4004.44	11.2386	7875	M8	R350	D1
M8_R350_D1	unaligned	8025	3154.64	3347.7	37.3701	1857	M8	R350	D1
M8_R350_D2	aligned	254014	8069.56	3980.34	7.89753	7874	M8	R350	D2
M8_R350_D2	unaligned	15973	3184.05	3360.78	26.5918	1866	M8	R350	D2
M8_R350_D3	aligned	380837	8055.64	3990.29	6.46599	7865	M8	R350	D3
M8_R350_D3	unaligned	24135	3173.5	3364.55	21.6573	1846	M8	R350	D3
M8_R350_D4	aligned	507813	8075.08	4005.52	5.62092	7869	M8	R350	D4
M8_R350_D4	unaligned	32129	3173.11	3363.65	18.7656	1845	M8	R350	D4
M8_R350_D5	aligned	634778	8069.28	3995.98	5.01548	7880	M8	R350	D5
M8_R350_D5	unaligned	40164	3154.21	3329.04	16.6112	1824	M8	R350	D5
M8_R450_D1	aligned	127052	8052.85	3965.94	11.1264	7873	M8	R450	D1
M8_R450_D1	unaligned	7986	3206.3	3372.6	37.7399	1865	M8	R450	D1
M8_R450_D2	aligned	253903	8056.63	3997.88	7.93406	7855	M8	R450	D2
M8_R450_D2	unaligned	16026	3171.97	3382.99	26.7232	1869	M8	R450	D2
M8_R450_D3	aligned	380800	8062.92	3999.62	6.48142	7863.5	M8	R450	D3
M8_R450_D3	unaligned	24171	3204.07	3440.4	22.129	1887	M8	R450	D3
M8_R450_D4	aligned	507880	8073.17	3999.08	5.61151	7878	M8	R450	D4
M8_R450_D4	unaligned	32108	3170.46	3372.81	18.8229	1847	M8	R450	D4
M8_R450_D5	aligned	634771	8066.86	3993.01	5.01178	7874	M8	R450	D5
M8_R450_D5	unaligned	40138	3146.93	3297.1	16.4571	1817.5	M8	R450	D5
M9_R50_D1	aligned	126961	8081.15	3998.69	11.2223	7876	M9	R50	D1
M9_R50_D1	unaligned	8028	3165.95	3257.67	36.3583	1902.5	M9	R50	D1
M9_R50_D2	aligned	253935	8073.77	3998.74	7.93528	7874	M9	R50	D2
M9_R50_D2	unaligned	16054	3141.16	3283.73	25.9165	1781.5	M9	R50	D2
M9_R50_D3	aligned	380921	8060.44	3995.46	6.47365	7865	M9	R50	D3
M9_R50_D3	unaligned	24049	3155.21	3297.57	21.2641	1855	M9	R50	D3
M9_R50_D4	aligned	507852	8065.76	3998.51	5.61087	7870	M9	R50	D4
M9_R50_D4	unaligned	32104	3125.59	3315	18.5014	1781	M9	R50	D4
M9_R50_D5	aligned	634797	8064.75	4001.15	5.02189	7868	M9	R50	D5
M9_R50_D5	unaligned	40148	3186.36	3329.8	16.6183	1881	M9	R50	D5
M9_R150_D1	aligned	127013	8070.81	4004.81	11.2372	7869	M9	R150	D1
M9_R150_D1	unaligned	8013	3183.37	3412.74	38.1246	1836	M9	R150	D1
M9_R150_D2	aligned	253940	8049.47	3981.81	7.90159	7854	M9	R150	D2
M9_R150_D2	unaligned	16035	3156.87	3364.13	26.5667	1834	M9	R150	D2
M9_R150_D3	aligned	380883	8066.54	4005.53	6.49029	7868	M9	R150	D3
M9_R150_D3	unaligned	24110	3158.54	3305.79	21.2901	1837	M9	R150	D3
M9_R150_D4	aligned	507816	8068.82	3980.98	5.58646	7870	M9	R150	D4
M9_R150_D4	unaligned	32138	3147.93	3374.7	18.8246	1809	M9	R150	D4
M9_R150_D5	aligned	634817	8057.02	3992.96	5.01153	7870	M9	R150	D5
M9_R150_D5	unaligned	40154	3154.4	3309.97	16.5181	1817	M9	R150	D5
M9_R250_D1	aligned	126942	8054.85	3994.62	11.2117	7851	M9	R250	D1
M9_R250_D1	unaligned	8026	3227.49	3319.75	37.0558	1887.5	M9	R250	D1
M9_R250_D2	aligned	253895	8061.55	4000.2	7.93879	7869	M9	R250	D2
M9_R250_D2	unaligned	16035	3161.91	3285.89	25.9489	1848	M9	R250	D2
M9_R250_D3	aligned	380865	8065.76	4009.37	6.49667	7872	M9	R250	D3
M9_R250_D3	unaligned	24141	3196.34	3358.02	21.6125	1867	M9	R250	D3
M9_R250_D4	aligned	507814	8067.27	3993.6	5.60419	7869	M9	R250	D4
M9_R250_D4	unaligned	32148	3187.62	3344.89	18.6554	1872.5	M9	R250	D4
M9_R250_D5	aligned	634818	8059	3997.89	5.01772	7867	M9	R250	D5
M9_R250_D5	unaligned	40123	3174.63	3313.5	16.5421	1846	M9	R250	D5
M9_R350_D1	aligned	126987	8068.19	4007.36	11.2455	7870	M9	R350	D1
M9_R350_D1	unaligned	8008	3195.98	3410.04	38.1064	1864	M9	R350	D1
M9_R350_D2	aligned	253928	8073.56	4002.62	7.94307	7871	M9	R350	D2
M9_R350_D2	unaligned	16050	3200.64	3408.43	26.904	1863	M9	R350	D2
M9_R350_D3	aligned	380795	8048.16	3993.37	6.47133	7855	M9	R350	D3
M9_R350_D3	unaligned	24184	3129.18	3339.26	21.4727	1785	M9	R350	D3
M9_R350_D4	aligned	507790	8062.24	4002.54	5.61686	7867	M9	R350	D4
M9_R350_D4	unaligned	32175	3159.17	3354.62	18.7018	1807	M9	R350	D4
M9_R350_D5	aligned	634779	8062.02	3989.65	5.00753	7865	M9	R350	D5
M9_R350_D5	unaligned	40183	3197.3	3336.77	16.6458	1896	M9	R350	D5
M9_R450_D1	aligned	126990	8074.4	3981.49	11.1728	7880	M9	R450	D1
M9_R450_D1	unaligned	8017	3082.16	3323.75	37.1213	1725	M9	R450	D1
M9_R450_D2	aligned	253989	8060.64	4000.26	7.93745	7863	M9	R450	D2
M9_R450_D2	unaligned	16042	3137.26	3363.8	26.5583	1784.5	M9	R450	D2
M9_R450_D3	aligned	380891	8072.76	3996.92	6.47628	7872	M9	R450	D3
M9_R450_D3	unaligned	24035	3151.84	3349.31	21.6039	1797	M9	R450	D3
M9_R450_D4	aligned	507718	8067.77	4000.67	5.61464	7875	M9	R450	D4
M9_R450_D4	unaligned	32216	3166.84	3308.8	18.4347	1869	M9	R450	D4
M9_R450_D5	aligned	634771	8059.07	4004.96	5.02677	7865	M9	R450	D5
M9_R450_D5	unaligned	40178	3167.2	3310.85	16.5176	1851.5	M9	R450	D5
M10_R50_D1	aligned	126964	8050.57	3996.52	11.2161	7854	M10	R50	D1
M10_R50_D1	unaligned	8030	3150.94	3229.51	36.0395	1855.5	M10	R50	D1
M10_R50_D2	aligned	253934	8060.29	3993.73	7.92534	7858	M10	R50	D2
M10_R50_D2	unaligned	16050	3145.57	3186.82	25.1547	1814.5	M10	R50	D2
M10_R50_D3	aligned	380891	8053.91	3983.91	6.4552	7868	M10	R50	D3
M10_R50_D3	unaligned	24068	3162.82	3389.34	21.8472	1845	M10	R50	D3
M10_R50_D4	aligned	507858	8065.6	3997.43	5.60931	7876	M10	R50	D4
M10_R50_D4	unaligned	32096	3173.09	3289.91	18.3637	1851.5	M10	R50	D4
M10_R50_D5	aligned	634774	8066.05	4002.48	5.02366	7875	M10	R50	D5
M10_R50_D5	unaligned	40168	3164.36	3356.2	16.7459	1819	M10	R50	D5
M10_R150_D1	aligned	126982	8069.7	3993.88	11.2079	7874	M10	R150	D1
M10_R150_D1	unaligned	8008	3188.2	3438.05	38.4193	1789	M10	R150	D1
M10_R150_D2	aligned	253910	8076.05	4008.14	7.95433	7875	M10	R150	D2
M10_R150_D2	unaligned	16075	3193.67	3402.44	26.8358	1846	M10	R150	D2
M10_R150_D3	aligned	380904	8065.12	3985.06	6.45695	7876	M10	R150	D3
M10_R150_D3	unaligned	24068	3192.51	3328.18	21.4529	1897	M10	R150	D3
M10_R150_D4	aligned	507788	8056.7	4002.54	5.61687	7861	M10	R150	D4
M10_R150_D4	unaligned	32159	3133.72	3328.31	18.5598	1781	M10	R150	D4
M10_R150_D5	aligned	634822	8068.94	3984.51	5.00091	7881	M10	R150	D5
M10_R150_D5	unaligned	40110	3157.22	3315.48	16.5547	1844	M10	R150	D5
M10_R250_D1	aligned	126986	8059.12	3987.92	11.191	7863	M10	R250	D1
M10_R250_D1	unaligned	8005	3149.94	3403.07	38.0356	1759	M10	R250	D1
M10_R250_D2	aligned	253897	8054.54	3976.57	7.89188	7858	M10	R250	D2
M10_R250_D2	unaligned	16086	3199.09	3379.16	26.6431	1823	M10	R250	D2
M10_R250_D3	aligned	380892	8060.93	3986.13	6.45879	7867	M10	R250	D3
M10_R250_D3	unaligned	24085	3188.22	3352.52	21.6022	1863	M10	R250	D3
M10_R250_D4	aligned	507842	8066.89	3995.47	5.60665	7874	M10	R250	D4
M10_R250_D4	unaligned	32123	3186.58	3406.25	19.005	1813	M10	R250	D4
M10_R250_D5	aligned	634755	8061.59	3989.91	5.00795	7867	M10	R250	D5
M10_R250_D5	unaligned	40215	3167.24	3364.54	16.7777	1801	M10	R250	D5
M10_R350_D1	aligned	126956	8086.24	4009.42	11.2527	7883	M10	R350	D1
M10_R350_D1	unaligned	8010	3193.38	3489.31	38.9873	1877	M10	R350	D1
M10_R350_D2	aligned	253821	8053.35	3993.82	7.92729	7859	M10	R350	D2
M10_R350_D2	unaligned	16120	3148.39	3281.57	25.8463	1796	M10	R350	D2
M10_R350_D3	aligned	380805	8067	3993.86	6.47205	7872	M10	R350	D3
M10_R350_D3	unaligned	24107	3137.54	3268.58	21.0517	1806	M10	R350	D3
M10_R350_D4	aligned	507908	8054.63	3994.09	5.60435	7860	M10	R350	D4
M10_R350_D4	unaligned	32102	3168.95	3390.32	18.9223	1825	M10	R350	D4
M10_R350_D5	aligned	634774	8062.27	3998.97	5.01925	7866	M10	R350	D5
M10_R350_D5	unaligned	40208	3159.61	3371.5	16.8139	1815	M10	R350	D5
M10_R450_D1	aligned	127059	8071.6	3982.26	11.1719	7879	M10	R450	D1
M10_R450_D1	unaligned	7987	3099.92	3273.08	36.6239	1796	M10	R450	D1
M10_R450_D2	aligned	253841	8060.13	3998.3	7.93587	7870	M10	R450	D2
M10_R450_D2	unaligned	16138	3146.59	3371.78	26.542	1833	M10	R450	D2
M10_R450_D3	aligned	380919	8069.94	4003.45	6.48661	7872	M10	R450	D3
M10_R450_D3	unaligned	24100	3133.27	3282.97	21.1475	1764	M10	R450	D3
M10_R450_D4	aligned	507781	8064.01	3992.58	5.60293	7870	M10	R450	D4
M10_R450_D4	unaligned	32149	3195.03	3335.75	18.6041	1874	M10	R450	D4
M10_R450_D5	aligned	634861	8068.18	3996.71	5.01606	7879	M10	R450	D5
M10_R450_D5	unaligned	40128	3178.53	3326.79	16.6074	1828	M10	R450	D5

## Sheet: TableS4
Tax feature	comparison	rho	pvalue	qvalue	prevalence	Tax Level
Actinobacteria	NanoporeIGC_vs_SolidIGC	0.741883	7.78386e-07	3.89193e-06	0.848485	phylum
Bacteroidetes	NanoporeIGC_vs_SolidIGC	0.34893	0.0472081	0.0472081	1	phylum
Firmicutes	NanoporeIGC_vs_SolidIGC	0.728944	3.53785e-06	8.84462e-06	1	phylum
Proteobacteria	NanoporeIGC_vs_SolidIGC	0.572615	0.000497028	0.000828379	0.727273	phylum
unclassified	NanoporeIGC_vs_SolidIGC	0.527137	0.00162149	0.00202687	0.636364	phylum
Actinobacteria_Actinobacteria	NanoporeIGC_vs_SolidIGC	0.843714	7.0045e-10	7.70495e-09	0.818182	class
Actinobacteria_Coriobacteriia	NanoporeIGC_vs_SolidIGC	0.350678	0.0454073	0.0519289	0.393939	class
Bacteroidetes_Bacteroidia	NanoporeIGC_vs_SolidIGC	0.34893	0.0472081	0.0519289	1	class
Firmicutes_Bacilli	NanoporeIGC_vs_SolidIGC	0.647856	4.58151e-05	8.39943e-05	0.424242	class
Firmicutes_Clostridia	NanoporeIGC_vs_SolidIGC	0.756684	1.42574e-06	3.92079e-06	1	class
Firmicutes_Erysipelotrichia	NanoporeIGC_vs_SolidIGC	0.795849	3.0904e-08	1.69972e-07	0.666667	class
Firmicutes_Negativicutes	NanoporeIGC_vs_SolidIGC	0.750944	4.79505e-07	1.75818e-06	0.757576	class
Firmicutes_unclassified Firmicutes	NanoporeIGC_vs_SolidIGC	0.671517	1.8838e-05	4.14436e-05	0.878788	class
Proteobacteria_Betaproteobacteria	NanoporeIGC_vs_SolidIGC	0.256712	0.149265	0.149265	0.424242	class
Proteobacteria_Gammaproteobacteria	NanoporeIGC_vs_SolidIGC	0.615107	0.000139369	0.000219008	0.363636	class
unclassified_unclassified	NanoporeIGC_vs_SolidIGC	0.527137	0.00162149	0.00222955	0.636364	class
Actinobacteria_Actinobacteria_Bifidobacteriales	NanoporeIGC_vs_SolidIGC	0.843714	7.0045e-10	7.70495e-09	0.818182	order
Actinobacteria_Coriobacteriia_Eggerthellales	NanoporeIGC_vs_SolidIGC	0.369819	0.0341512	0.0417404	0.393939	order
Bacteroidetes_Bacteroidia_Bacteroidales	NanoporeIGC_vs_SolidIGC	0.34893	0.0472081	0.0519289	1	order
Firmicutes_Bacilli_Lactobacillales	NanoporeIGC_vs_SolidIGC	0.647856	4.58151e-05	8.39943e-05	0.424242	order
Firmicutes_Clostridia_Clostridiales	NanoporeIGC_vs_SolidIGC	0.756684	1.42574e-06	3.92079e-06	1	order
Firmicutes_Erysipelotrichia_Erysipelotrichales	NanoporeIGC_vs_SolidIGC	0.795849	3.0904e-08	1.69972e-07	0.666667	order
Firmicutes_Negativicutes_Selenomonadales	NanoporeIGC_vs_SolidIGC	0.750944	4.79505e-07	1.75818e-06	0.757576	order
Firmicutes_unclassified Firmicutes_unclassified Firmicutes	NanoporeIGC_vs_SolidIGC	0.671517	1.8838e-05	4.14436e-05	0.878788	order
Proteobacteria_Betaproteobacteria_Burkholderiales	NanoporeIGC_vs_SolidIGC	0.248539	0.163108	0.163108	0.424242	order
Proteobacteria_Gammaproteobacteria_Enterobacteriales	NanoporeIGC_vs_SolidIGC	0.490224	0.00377827	0.00519512	0.242424	order
unclassified_unclassified_unclassified	NanoporeIGC_vs_SolidIGC	0.527137	0.00162149	0.00254806	0.636364	order
Actinobacteria_Actinobacteria_Bifidobacteriales_Bifidobacteriaceae	NanoporeIGC_vs_SolidIGC	0.843714	7.0045e-10	4.90315e-09	0.818182	family
Actinobacteria_Coriobacteriia_Eggerthellales_Eggerthellaceae	NanoporeIGC_vs_SolidIGC	0.369819	0.0341512	0.0358588	0.393939	family
Bacteroidetes_Bacteroidia_Bacteroidales_Bacteroidaceae	NanoporeIGC_vs_SolidIGC	0.735021	1.10882e-06	2.91064e-06	0.939394	family
Bacteroidetes_Bacteroidia_Bacteroidales_Porphyromonadaceae	NanoporeIGC_vs_SolidIGC	0.625252	0.000100075	0.000175131	0.636364	family
Bacteroidetes_Bacteroidia_Bacteroidales_Prevotellaceae	NanoporeIGC_vs_SolidIGC	0.866129	7.48373e-11	1.39451e-09	0.484848	family
Bacteroidetes_Bacteroidia_Bacteroidales_Rikenellaceae	NanoporeIGC_vs_SolidIGC	0.831785	2.00686e-09	1.0536e-08	0.636364	family
Bacteroidetes_Bacteroidia_Bacteroidales_unclassified Bacteroidales	NanoporeIGC_vs_SolidIGC	0.524398	0.00173225	0.00213983	0.242424	family
Firmicutes_Bacilli_Lactobacillales_Streptococcaceae	NanoporeIGC_vs_SolidIGC	0.580977	0.000392361	0.000588542	0.363636	family
Firmicutes_Clostridia_Clostridiales_Clostridiaceae	NanoporeIGC_vs_SolidIGC	0.59953	0.000226789	0.000366352	0.333333	family
Firmicutes_Clostridia_Clostridiales_Eubacteriaceae	NanoporeIGC_vs_SolidIGC	0.711564	6.78796e-06	1.58386e-05	0.969697	family
Firmicutes_Clostridia_Clostridiales_Lachnospiraceae	NanoporeIGC_vs_SolidIGC	0.570856	0.000648925	0.000908495	1	family
Firmicutes_Clostridia_Clostridiales_Oscillospiraceae	NanoporeIGC_vs_SolidIGC	0.636055	6.9424e-05	0.000132537	0.242424	family
Firmicutes_Clostridia_Clostridiales_Ruminococcaceae	NanoporeIGC_vs_SolidIGC	0.860731	1.32811e-10	1.39451e-09	0.848485	family
Firmicutes_Clostridia_Clostridiales_unclassified Clostridiales	NanoporeIGC_vs_SolidIGC	0.776404	8.88487e-07	2.66546e-06	0.969697	family
Firmicutes_Erysipelotrichia_Erysipelotrichales_Erysipelotrichaceae	NanoporeIGC_vs_SolidIGC	0.795849	3.0904e-08	1.29797e-07	0.666667	family
Firmicutes_Negativicutes_Selenomonadales_Acidaminococcaceae	NanoporeIGC_vs_SolidIGC	0.412567	0.0170323	0.0188251	0.393939	family
Firmicutes_Negativicutes_Selenomonadales_Veillonellaceae	NanoporeIGC_vs_SolidIGC	0.762517	2.50521e-07	8.76825e-07	0.575758	family
Firmicutes_unclassified Firmicutes_unclassified Firmicutes_unclassified Firmicutes	NanoporeIGC_vs_SolidIGC	0.671517	1.8838e-05	3.95598e-05	0.878788	family
Proteobacteria_Betaproteobacteria_Burkholderiales_Sutterellaceae	NanoporeIGC_vs_SolidIGC	0.224475	0.209155	0.209155	0.333333	family
Proteobacteria_Gammaproteobacteria_Enterobacteriales_Enterobacteriaceae	NanoporeIGC_vs_SolidIGC	0.490224	0.00377827	0.00440798	0.242424	family
unclassified_unclassified_unclassified_unclassified	NanoporeIGC_vs_SolidIGC	0.527137	0.00162149	0.00212821	0.636364	family
Actinobacteria_Actinobacteria_Bifidobacteriales_Bifidobacteriaceae_Bifidobacterium	NanoporeIGC_vs_SolidIGC	0.843714	7.0045e-10	4.90315e-09	0.818182	genus
Actinobacteria_Coriobacteriia_Eggerthellales_Eggerthellaceae_Eggerthella	NanoporeIGC_vs_SolidIGC	0.310633	0.078498	0.0814054	0.242424	genus
Bacteroidetes_Bacteroidia_Bacteroidales_Bacteroidaceae_Bacteroides	NanoporeIGC_vs_SolidIGC	0.735021	1.10882e-06	3.44965e-06	0.939394	genus
Bacteroidetes_Bacteroidia_Bacteroidales_Porphyromonadaceae_Parabacteroides	NanoporeIGC_vs_SolidIGC	0.639539	6.152e-05	0.00012304	0.515152	genus
Bacteroidetes_Bacteroidia_Bacteroidales_Prevotellaceae_Prevotella	NanoporeIGC_vs_SolidIGC	0.862516	1.10162e-10	1.02818e-09	0.484848	genus
Bacteroidetes_Bacteroidia_Bacteroidales_Rikenellaceae_Alistipes	NanoporeIGC_vs_SolidIGC	0.831785	2.00686e-09	1.12384e-08	0.636364	genus
Bacteroidetes_Bacteroidia_Bacteroidales_unclassified Bacteroidales_unclassified Bacteroidales	NanoporeIGC_vs_SolidIGC	0.524398	0.00173225	0.00220468	0.242424	genus
Firmicutes_Bacilli_Lactobacillales_Streptococcaceae_Streptococcus	NanoporeIGC_vs_SolidIGC	0.559646	0.000708507	0.00104412	0.363636	genus
Firmicutes_Clostridia_Clostridiales_Clostridiaceae_Clostridium	NanoporeIGC_vs_SolidIGC	0.487558	0.00400211	0.00466913	0.272727	genus
Firmicutes_Clostridia_Clostridiales_Eubacteriaceae_Eubacterium	NanoporeIGC_vs_SolidIGC	0.711564	6.78796e-06	1.58386e-05	0.969697	genus
Firmicutes_Clostridia_Clostridiales_Lachnospiraceae_Anaerostipes	NanoporeIGC_vs_SolidIGC	0.70742	4.15751e-06	1.05827e-05	0.484848	genus
Firmicutes_Clostridia_Clostridiales_Lachnospiraceae_Blautia	NanoporeIGC_vs_SolidIGC	0.637701	9.45666e-05	0.000147104	1	genus
Firmicutes_Clostridia_Clostridiales_Lachnospiraceae_Coprococcus	NanoporeIGC_vs_SolidIGC	0.634325	7.36793e-05	0.000128939	0.787879	genus
Firmicutes_Clostridia_Clostridiales_Lachnospiraceae_Dorea	NanoporeIGC_vs_SolidIGC	0.502467	0.00288348	0.00351033	0.878788	genus
Firmicutes_Clostridia_Clostridiales_Lachnospiraceae_Roseburia	NanoporeIGC_vs_SolidIGC	0.803657	1.78999e-08	8.35329e-08	0.818182	genus
Firmicutes_Clostridia_Clostridiales_Lachnospiraceae_unclassified Lachnospiraceae	NanoporeIGC_vs_SolidIGC	0.450066	0.00858741	0.0096179	0.606061	genus
Firmicutes_Clostridia_Clostridiales_Oscillospiraceae_Oscillibacter	NanoporeIGC_vs_SolidIGC	0.636055	6.9424e-05	0.000128939	0.242424	genus
Firmicutes_Clostridia_Clostridiales_Ruminococcaceae_Faecalibacterium	NanoporeIGC_vs_SolidIGC	0.773017	1.34594e-07	5.38377e-07	0.848485	genus
Firmicutes_Clostridia_Clostridiales_Ruminococcaceae_Ruminococcus	NanoporeIGC_vs_SolidIGC	0.870267	4.73965e-11	6.63551e-10	0.757576	genus
Firmicutes_Clostridia_Clostridiales_Ruminococcaceae_unclassified Ruminococcaceae	NanoporeIGC_vs_SolidIGC	0.530747	0.00148505	0.00207907	0.333333	genus
Firmicutes_Clostridia_Clostridiales_unclassified Clostridiales_unclassified Clostridiales	NanoporeIGC_vs_SolidIGC	0.770053	1.01803e-06	3.44965e-06	0.969697	genus
Firmicutes_Erysipelotrichia_Erysipelotrichales_Erysipelotrichaceae_Coprobacillus	NanoporeIGC_vs_SolidIGC	0.631197	8.19736e-05	0.000135015	0.242424	genus
Firmicutes_Erysipelotrichia_Erysipelotrichales_Erysipelotrichaceae_Holdemanella	NanoporeIGC_vs_SolidIGC	0.888489	5.17436e-12	1.44882e-10	0.272727	genus
Firmicutes_Negativicutes_Selenomonadales_Acidaminococcaceae_Phascolarctobacterium	NanoporeIGC_vs_SolidIGC	0.287684	0.104499	0.104499	0.212121	genus
Firmicutes_Negativicutes_Selenomonadales_Veillonellaceae_Dialister	NanoporeIGC_vs_SolidIGC	0.725414	1.78798e-06	5.00633e-06	0.272727	genus
Firmicutes_unclassified Firmicutes_unclassified Firmicutes_unclassified Firmicutes_unclassified Firmicutes	NanoporeIGC_vs_SolidIGC	0.671517	1.8838e-05	4.05741e-05	0.878788	genus
Proteobacteria_Betaproteobacteria_Burkholderiales_Sutterellaceae_Sutterella	NanoporeIGC_vs_SolidIGC	0.403203	0.019983	0.0215202	0.272727	genus
unclassified_unclassified_unclassified_unclassified_unclassified	NanoporeIGC_vs_SolidIGC	0.527137	0.00162149	0.00216199	0.636364	genus
Actinobacteria_Actinobacteria_Bifidobacteriales_Bifidobacteriaceae_Bifidobacterium_Bifidobacterium adolescentis	NanoporeIGC_vs_SolidIGC	0.812897	9.08275e-09	7.91497e-08	0.606061	species
Actinobacteria_Actinobacteria_Bifidobacteriales_Bifidobacteriaceae_Bifidobacterium_Bifidobacterium bifidum	NanoporeIGC_vs_SolidIGC	0.741437	7.96758e-07	2.31439e-06	0.30303	species
Actinobacteria_Actinobacteria_Bifidobacteriales_Bifidobacteriaceae_Bifidobacterium_Bifidobacterium longum	NanoporeIGC_vs_SolidIGC	0.839952	9.85281e-10	1.0017e-08	0.575758	species
Bacteroidetes_Bacteroidia_Bacteroidales_Bacteroidaceae_Bacteroides_Bacteroides ovatus	NanoporeIGC_vs_SolidIGC	0.709738	3.74235e-06	7.60945e-06	0.363636	species
Bacteroidetes_Bacteroidia_Bacteroidales_Bacteroidaceae_Bacteroides_Bacteroides uniformis	NanoporeIGC_vs_SolidIGC	0.752665	4.36349e-07	1.51947e-06	0.636364	species
Bacteroidetes_Bacteroidia_Bacteroidales_Bacteroidaceae_Bacteroides_Bacteroides vulgatus	NanoporeIGC_vs_SolidIGC	0.7968	2.89531e-08	1.96238e-07	0.727273	species
Bacteroidetes_Bacteroidia_Bacteroidales_Bacteroidaceae_Bacteroides_unclassified Bacteroides	NanoporeIGC_vs_SolidIGC	0.486895	0.00405954	0.00442199	0.272727	species
Bacteroidetes_Bacteroidia_Bacteroidales_Porphyromonadaceae_Parabacteroides_Parabacteroides distasonis	NanoporeIGC_vs_SolidIGC	0.630224	8.4716e-05	0.000120178	0.242424	species
Bacteroidetes_Bacteroidia_Bacteroidales_Porphyromonadaceae_Parabacteroides_Parabacteroides merdae	NanoporeIGC_vs_SolidIGC	0.701716	5.36309e-06	1.02234e-05	0.212121	species
Bacteroidetes_Bacteroidia_Bacteroidales_Prevotellaceae_Prevotella_Prevotella copri	NanoporeIGC_vs_SolidIGC	0.763812	2.32438e-07	8.86168e-07	0.242424	species
Bacteroidetes_Bacteroidia_Bacteroidales_Rikenellaceae_Alistipes_Alistipes onderdonkii	NanoporeIGC_vs_SolidIGC	0.672776	1.79286e-05	3.03789e-05	0.212121	species
Bacteroidetes_Bacteroidia_Bacteroidales_Rikenellaceae_Alistipes_Alistipes putredinis	NanoporeIGC_vs_SolidIGC	0.748372	5.51337e-07	1.77008e-06	0.363636	species
Bacteroidetes_Bacteroidia_Bacteroidales_unclassified Bacteroidales_unclassified Bacteroidales_unclassified Bacteroidales	NanoporeIGC_vs_SolidIGC	0.524398	0.00173225	0.00192122	0.242424	species
Firmicutes_Bacilli_Lactobacillales_Streptococcaceae_Streptococcus_Streptococcus thermophilus	NanoporeIGC_vs_SolidIGC	0.546946	0.000988885	0.00118278	0.30303	species
Firmicutes_Clostridia_Clostridiales_Clostridiaceae_Clostridium_unclassified Clostridium	NanoporeIGC_vs_SolidIGC	0.462706	0.00670058	0.0071708	0.212121	species
Firmicutes_Clostridia_Clostridiales_Eubacteriaceae_Eubacterium_Eubacterium hallii	NanoporeIGC_vs_SolidIGC	0.32924	0.061351	0.061351	0.666667	species
Firmicutes_Clostridia_Clostridiales_Eubacteriaceae_Eubacterium_Eubacterium ramulus	NanoporeIGC_vs_SolidIGC	0.663721	2.54655e-05	4.08788e-05	0.212121	species
Firmicutes_Clostridia_Clostridiales_Eubacteriaceae_Eubacterium_Eubacterium rectale	NanoporeIGC_vs_SolidIGC	0.905728	4.33341e-13	1.32169e-11	0.818182	species
Firmicutes_Clostridia_Clostridiales_Eubacteriaceae_Eubacterium_Eubacterium sp. CAG:38	NanoporeIGC_vs_SolidIGC	0.728358	1.54773e-06	4.10484e-06	0.242424	species
Firmicutes_Clostridia_Clostridiales_Eubacteriaceae_Eubacterium_Eubacterium sp. CAG:76	NanoporeIGC_vs_SolidIGC	0.693215	7.75491e-06	1.43348e-05	0.242424	species
Firmicutes_Clostridia_Clostridiales_Eubacteriaceae_Eubacterium_unclassified Eubacterium	NanoporeIGC_vs_SolidIGC	0.602728	0.000205639	0.000266893	0.242424	species
Firmicutes_Clostridia_Clostridiales_Lachnospiraceae_Anaerostipes_Anaerostipes hadrus	NanoporeIGC_vs_SolidIGC	0.709997	3.69849e-06	7.60945e-06	0.484848	species
Firmicutes_Clostridia_Clostridiales_Lachnospiraceae_Blautia_Blautia sp. CAG:37	NanoporeIGC_vs_SolidIGC	0.773333	1.32035e-07	5.75295e-07	0.69697	species
Firmicutes_Clostridia_Clostridiales_Lachnospiraceae_Blautia_Blautia sp. CAG:52	NanoporeIGC_vs_SolidIGC	0.768415	1.77424e-07	7.21525e-07	0.363636	species
Firmicutes_Clostridia_Clostridiales_Lachnospiraceae_Blautia_Blautia sp. KLE 1732	NanoporeIGC_vs_SolidIGC	0.875684	2.54467e-11	5.17416e-10	0.818182	species
Firmicutes_Clostridia_Clostridiales_Lachnospiraceae_Blautia_Blautia wexlerae	NanoporeIGC_vs_SolidIGC	0.659091	4.65436e-05	6.92478e-05	0.969697	species
Firmicutes_Clostridia_Clostridiales_Lachnospiraceae_Blautia_Ruminococcus gnavus	NanoporeIGC_vs_SolidIGC	0.532636	0.00141777	0.00163177	0.212121	species
Firmicutes_Clostridia_Clostridiales_Lachnospiraceae_Blautia_Ruminococcus obeum	NanoporeIGC_vs_SolidIGC	0.58484	0.000350999	0.000436958	0.30303	species
Firmicutes_Clostridia_Clostridiales_Lachnospiraceae_Blautia_Ruminococcus sp. CAG:17	NanoporeIGC_vs_SolidIGC	0.73734	9.85064e-07	2.73131e-06	0.272727	species
Firmicutes_Clostridia_Clostridiales_Lachnospiraceae_Blautia_Ruminococcus torques 1	NanoporeIGC_vs_SolidIGC	0.605663	0.000187795	0.000249033	0.333333	species
Firmicutes_Clostridia_Clostridiales_Lachnospiraceae_Blautia_Ruminococcus torques 2	NanoporeIGC_vs_SolidIGC	0.65948	2.98936e-05	4.55877e-05	0.545455	species
Firmicutes_Clostridia_Clostridiales_Lachnospiraceae_Blautia_unclassified Blautia	NanoporeIGC_vs_SolidIGC	0.453052	0.00810525	0.00852449	0.272727	species
Firmicutes_Clostridia_Clostridiales_Lachnospiraceae_Coprococcus_Coprococcus comes	NanoporeIGC_vs_SolidIGC	0.588635	0.000314174	0.000399263	0.575758	species
Firmicutes_Clostridia_Clostridiales_Lachnospiraceae_Dorea_Dorea formicigenerans	NanoporeIGC_vs_SolidIGC	0.42157	0.0145472	0.0147896	0.333333	species
Firmicutes_Clostridia_Clostridiales_Lachnospiraceae_Dorea_Dorea longicatena 1	NanoporeIGC_vs_SolidIGC	0.742397	7.57655e-07	2.31085e-06	0.69697	species
Firmicutes_Clostridia_Clostridiales_Lachnospiraceae_Dorea_Dorea longicatena 2	NanoporeIGC_vs_SolidIGC	0.779952	8.76852e-08	4.11446e-07	0.30303	species
Firmicutes_Clostridia_Clostridiales_Lachnospiraceae_Roseburia_Roseburia intestinalis	NanoporeIGC_vs_SolidIGC	0.719822	2.34009e-06	5.94773e-06	0.363636	species
Firmicutes_Clostridia_Clostridiales_Lachnospiraceae_Roseburia_Roseburia inulinivorans	NanoporeIGC_vs_SolidIGC	0.669096	2.07058e-05	3.41365e-05	0.393939	species
Firmicutes_Clostridia_Clostridiales_Lachnospiraceae_Roseburia_Roseburia sp. CAG:18	NanoporeIGC_vs_SolidIGC	0.947382	6.89937e-17	4.20861e-15	0.636364	species
Firmicutes_Clostridia_Clostridiales_Lachnospiraceae_unclassified Lachnospiraceae_unclassified Lachnospiraceae	NanoporeIGC_vs_SolidIGC	0.445583	0.00935708	0.00967427	0.606061	species
Firmicutes_Clostridia_Clostridiales_Ruminococcaceae_Faecalibacterium_Faecalibacterium 1	NanoporeIGC_vs_SolidIGC	0.80242	1.95489e-08	1.49061e-07	0.424242	species
Firmicutes_Clostridia_Clostridiales_Ruminococcaceae_Faecalibacterium_Faecalibacterium 2	NanoporeIGC_vs_SolidIGC	0.752171	4.48369e-07	1.51947e-06	0.515152	species
Firmicutes_Clostridia_Clostridiales_Ruminococcaceae_Faecalibacterium_Faecalibacterium 3	NanoporeIGC_vs_SolidIGC	0.79406	3.49086e-08	2.0172e-07	0.424242	species
Firmicutes_Clostridia_Clostridiales_Ruminococcaceae_Faecalibacterium_Faecalibacterium 4	NanoporeIGC_vs_SolidIGC	0.792001	4.01048e-08	2.03866e-07	0.333333	species
Firmicutes_Clostridia_Clostridiales_Ruminococcaceae_Faecalibacterium_Faecalibacterium 6	NanoporeIGC_vs_SolidIGC	0.606475	0.000183109	0.000248214	0.212121	species
Firmicutes_Clostridia_Clostridiales_Ruminococcaceae_Faecalibacterium_Faecalibacterium 8 (Ruminococcus sp. CAG:330)	NanoporeIGC_vs_SolidIGC	0.845293	6.05387e-10	7.38572e-09	0.454545	species
Firmicutes_Clostridia_Clostridiales_Ruminococcaceae_Faecalibacterium_unclassified Faecalibacterium	NanoporeIGC_vs_SolidIGC	0.622891	0.000108204	0.00015001	0.636364	species
Firmicutes_Clostridia_Clostridiales_Ruminococcaceae_Ruminococcus_Ruminococcus bicirculans	NanoporeIGC_vs_SolidIGC	0.793452	3.63757e-08	2.0172e-07	0.30303	species
Firmicutes_Clostridia_Clostridiales_Ruminococcaceae_Ruminococcus_Ruminococcus bromii	NanoporeIGC_vs_SolidIGC	0.857985	1.76208e-10	2.68717e-09	0.515152	species
Firmicutes_Clostridia_Clostridiales_Ruminococcaceae_Ruminococcus_Ruminococcus sp. CAG:254	NanoporeIGC_vs_SolidIGC	0.661008	2.82237e-05	4.41448e-05	0.212121	species
Firmicutes_Clostridia_Clostridiales_Ruminococcaceae_Ruminococcus_unclassified Ruminococcus	NanoporeIGC_vs_SolidIGC	0.717694	2.58814e-06	6.31506e-06	0.424242	species
Firmicutes_Clostridia_Clostridiales_Ruminococcaceae_unclassified Ruminococcaceae_Ruminococcaceae bacterium LM158	NanoporeIGC_vs_SolidIGC	0.675197	1.62893e-05	2.839e-05	0.242424	species
Firmicutes_Clostridia_Clostridiales_unclassified Clostridiales_unclassified Clostridiales_Clostridium sp. CAG:7	NanoporeIGC_vs_SolidIGC	0.713837	3.09957e-06	6.87854e-06	0.212121	species
Firmicutes_Clostridia_Clostridiales_unclassified Clostridiales_unclassified Clostridiales_unclassified Clostridiales	NanoporeIGC_vs_SolidIGC	0.713438	3.15736e-06	6.87854e-06	0.666667	species
Firmicutes_Erysipelotrichia_Erysipelotrichales_Erysipelotrichaceae_Coprobacillus_Coprobacillus sp. CAG:235	NanoporeIGC_vs_SolidIGC	0.549941	0.000915183	0.00111652	0.212121	species
Firmicutes_unclassified Firmicutes_unclassified Firmicutes_unclassified Firmicutes_unclassified Firmicutes_Firmicutes bacterium CAG:270	NanoporeIGC_vs_SolidIGC	0.705117	4.61089e-06	9.07303e-06	0.242424	species
Firmicutes_unclassified Firmicutes_unclassified Firmicutes_unclassified Firmicutes_unclassified Firmicutes_Firmicutes bacterium CAG:41	NanoporeIGC_vs_SolidIGC	0.534224	0.00136325	0.0015992	0.242424	species
Firmicutes_unclassified Firmicutes_unclassified Firmicutes_unclassified Firmicutes_unclassified Firmicutes_Firmicutes bacterium CAG:56	NanoporeIGC_vs_SolidIGC	0.687919	9.69771e-06	1.73988e-05	0.272727	species
Firmicutes_unclassified Firmicutes_unclassified Firmicutes_unclassified Firmicutes_unclassified Firmicutes_Firmicutes bacterium CAG:65	NanoporeIGC_vs_SolidIGC	0.63411	7.42263e-05	0.000107805	0.212121	species
Firmicutes_unclassified Firmicutes_unclassified Firmicutes_unclassified Firmicutes_unclassified Firmicutes_unclassified Firmicutes	NanoporeIGC_vs_SolidIGC	0.715642	2.84971e-06	6.68586e-06	0.575758	species
unclassified_unclassified_unclassified_unclassified_unclassified_unclassified	NanoporeIGC_vs_SolidIGC	0.527137	0.00162149	0.00183169	0.636364	species
Actinobacteria	NanoporeIGC_vs_IlluminaIGC	0.87431	2.20986e-07	5.52464e-07	0.848485	phylum
Bacteroidetes	NanoporeIGC_vs_IlluminaIGC	0.646753	0.00196778	0.00283108	1	phylum
Firmicutes	NanoporeIGC_vs_IlluminaIGC	0.85974	0	0	1	phylum
Proteobacteria	NanoporeIGC_vs_IlluminaIGC	0.628772	0.00226486	0.00283108	0.727273	phylum
unclassified	NanoporeIGC_vs_IlluminaIGC	0.212415	0.355272	0.355272	0.636364	phylum
Actinobacteria_Actinobacteria	NanoporeIGC_vs_IlluminaIGC	0.884266	1.05049e-07	6.66176e-07	0.818182	class
Actinobacteria_Coriobacteriia	NanoporeIGC_vs_IlluminaIGC	0.645269	0.00158445	0.00290483	0.393939	class
Bacteroidetes_Bacteroidia	NanoporeIGC_vs_IlluminaIGC	0.646753	0.00196778	0.00309223	1	class
Firmicutes_Bacilli	NanoporeIGC_vs_IlluminaIGC	0.801041	1.28233e-05	2.82112e-05	0.424242	class
Firmicutes_Clostridia	NanoporeIGC_vs_IlluminaIGC	0.87013	3.69574e-07	1.3551e-06	1	class
Firmicutes_Erysipelotrichia	NanoporeIGC_vs_IlluminaIGC	0.882426	1.21123e-07	6.66176e-07	0.666667	class
Firmicutes_Negativicutes	NanoporeIGC_vs_IlluminaIGC	0.5603	0.00824735	0.0113401	0.757576	class
Firmicutes_unclassified Firmicutes	NanoporeIGC_vs_IlluminaIGC	0.856122	7.40899e-07	2.03747e-06	0.878788	class
Proteobacteria_Betaproteobacteria	NanoporeIGC_vs_IlluminaIGC	0.526747	0.0141542	0.0155696	0.424242	class
Proteobacteria_Gammaproteobacteria	NanoporeIGC_vs_IlluminaIGC	0.552852	0.00934185	0.0114178	0.363636	class
unclassified_unclassified	NanoporeIGC_vs_IlluminaIGC	0.212415	0.355272	0.355272	0.636364	class
Actinobacteria_Actinobacteria_Bifidobacteriales	NanoporeIGC_vs_IlluminaIGC	0.884266	1.05049e-07	6.66176e-07	0.818182	order
Actinobacteria_Coriobacteriia_Eggerthellales	NanoporeIGC_vs_IlluminaIGC	0.596172	0.00434096	0.0068215	0.393939	order
Bacteroidetes_Bacteroidia_Bacteroidales	NanoporeIGC_vs_IlluminaIGC	0.646753	0.00196778	0.0036076	1	order
Firmicutes_Bacilli_Lactobacillales	NanoporeIGC_vs_IlluminaIGC	0.801041	1.28233e-05	2.82112e-05	0.424242	order
Firmicutes_Clostridia_Clostridiales	NanoporeIGC_vs_IlluminaIGC	0.87013	3.69574e-07	1.3551e-06	1	order
Firmicutes_Erysipelotrichia_Erysipelotrichales	NanoporeIGC_vs_IlluminaIGC	0.882426	1.21123e-07	6.66176e-07	0.666667	order
Firmicutes_Negativicutes_Selenomonadales	NanoporeIGC_vs_IlluminaIGC	0.5603	0.00824735	0.0113401	0.757576	order
Firmicutes_unclassified Firmicutes_unclassified Firmicutes	NanoporeIGC_vs_IlluminaIGC	0.856122	7.40899e-07	2.03747e-06	0.878788	order
Proteobacteria_Betaproteobacteria_Burkholderiales	NanoporeIGC_vs_IlluminaIGC	0.526747	0.0141542	0.0172995	0.424242	order
Proteobacteria_Gammaproteobacteria_Enterobacteriales	NanoporeIGC_vs_IlluminaIGC	0.390722	0.0799005	0.0878906	0.242424	order
unclassified_unclassified_unclassified	NanoporeIGC_vs_IlluminaIGC	0.212415	0.355272	0.355272	0.636364	order
Actinobacteria_Actinobacteria_Bifidobacteriales_Bifidobacteriaceae	NanoporeIGC_vs_IlluminaIGC	0.884266	1.05049e-07	4.2393e-07	0.818182	family
Actinobacteria_Coriobacteriia_Eggerthellales_Eggerthellaceae	NanoporeIGC_vs_IlluminaIGC	0.596172	0.00434096	0.0056975	0.393939	family
Bacteroidetes_Bacteroidia_Bacteroidales_Bacteroidaceae	NanoporeIGC_vs_IlluminaIGC	0.8152	6.7471e-06	1.57432e-05	0.939394	family
Bacteroidetes_Bacteroidia_Bacteroidales_Porphyromonadaceae	NanoporeIGC_vs_IlluminaIGC	0.772256	4.09949e-05	7.8263e-05	0.636364	family
Bacteroidetes_Bacteroidia_Bacteroidales_Prevotellaceae	NanoporeIGC_vs_IlluminaIGC	0.955381	1.62875e-11	1.71018e-10	0.484848	family
Bacteroidetes_Bacteroidia_Bacteroidales_Rikenellaceae	NanoporeIGC_vs_IlluminaIGC	0.912241	8.48355e-09	4.45386e-08	0.636364	family
Bacteroidetes_Bacteroidia_Bacteroidales_unclassified Bacteroidales	NanoporeIGC_vs_IlluminaIGC	-0.0579634	0.802923	0.802923	0.242424	family
Firmicutes_Bacilli_Lactobacillales_Streptococcaceae	NanoporeIGC_vs_IlluminaIGC	0.765105	5.33434e-05	9.3351e-05	0.363636	family
Firmicutes_Clostridia_Clostridiales_Clostridiaceae	NanoporeIGC_vs_IlluminaIGC	0.7033	0.000375672	0.00052594	0.333333	family
Firmicutes_Clostridia_Clostridiales_Eubacteriaceae	NanoporeIGC_vs_IlluminaIGC	0.851948	0	0	0.969697	family
Firmicutes_Clostridia_Clostridiales_Lachnospiraceae	NanoporeIGC_vs_IlluminaIGC	0.903896	3.39716e-06	8.91754e-06	1	family
Firmicutes_Clostridia_Clostridiales_Oscillospiraceae	NanoporeIGC_vs_IlluminaIGC	0.712532	0.000289684	0.000434526	0.242424	family
Firmicutes_Clostridia_Clostridiales_Ruminococcaceae	NanoporeIGC_vs_IlluminaIGC	0.949009	5.64558e-11	3.9519e-10	0.848485	family
Firmicutes_Clostridia_Clostridiales_unclassified Clostridiales	NanoporeIGC_vs_IlluminaIGC	0.78961	2.82962e-05	5.9422e-05	0.969697	family
Firmicutes_Erysipelotrichia_Erysipelotrichales_Erysipelotrichaceae	NanoporeIGC_vs_IlluminaIGC	0.882426	1.21123e-07	4.2393e-07	0.666667	family
Firmicutes_Negativicutes_Selenomonadales_Acidaminococcaceae	NanoporeIGC_vs_IlluminaIGC	0.370191	0.0985667	0.108942	0.393939	family
Firmicutes_Negativicutes_Selenomonadales_Veillonellaceae	NanoporeIGC_vs_IlluminaIGC	0.760415	6.30893e-05	0.000101913	0.575758	family
Firmicutes_unclassified Firmicutes_unclassified Firmicutes_unclassified Firmicutes	NanoporeIGC_vs_IlluminaIGC	0.856122	7.40899e-07	2.2227e-06	0.878788	family
Proteobacteria_Betaproteobacteria_Burkholderiales_Sutterellaceae	NanoporeIGC_vs_IlluminaIGC	0.419527	0.0583302	0.0720549	0.333333	family
Proteobacteria_Gammaproteobacteria_Enterobacteriales_Enterobacteriaceae	NanoporeIGC_vs_IlluminaIGC	0.390722	0.0799005	0.0932173	0.242424	family
unclassified_unclassified_unclassified_unclassified	NanoporeIGC_vs_IlluminaIGC	0.212415	0.355272	0.373035	0.636364	family
Actinobacteria_Actinobacteria_Bifidobacteriales_Bifidobacteriaceae_Bifidobacterium	NanoporeIGC_vs_IlluminaIGC	0.884266	1.05049e-07	3.67672e-07	0.818182	genus
Actinobacteria_Coriobacteriia_Eggerthellales_Eggerthellaceae_Eggerthella	NanoporeIGC_vs_IlluminaIGC	0.594136	0.00451084	0.00549146	0.242424	genus
Bacteroidetes_Bacteroidia_Bacteroidales_Bacteroidaceae_Bacteroides	NanoporeIGC_vs_IlluminaIGC	0.8152	6.7471e-06	1.45322e-05	0.939394	genus
Bacteroidetes_Bacteroidia_Bacteroidales_Porphyromonadaceae_Parabacteroides	NanoporeIGC_vs_IlluminaIGC	0.697292	0.000442652	0.000652329	0.515152	genus
Bacteroidetes_Bacteroidia_Bacteroidales_Prevotellaceae_Prevotella	NanoporeIGC_vs_IlluminaIGC	0.987879	7.76301e-17	1.08682e-15	0.484848	genus
Bacteroidetes_Bacteroidia_Bacteroidales_Rikenellaceae_Alistipes	NanoporeIGC_vs_IlluminaIGC	0.912241	8.48355e-09	4.75079e-08	0.636364	genus
Bacteroidetes_Bacteroidia_Bacteroidales_unclassified Bacteroidales_unclassified Bacteroidales	NanoporeIGC_vs_IlluminaIGC	-0.0579634	0.802923	0.802923	0.242424	genus
Firmicutes_Bacilli_Lactobacillales_Streptococcaceae_Streptococcus	NanoporeIGC_vs_IlluminaIGC	0.781351	2.89292e-05	5.40011e-05	0.363636	genus
Firmicutes_Clostridia_Clostridiales_Clostridiaceae_Clostridium	NanoporeIGC_vs_IlluminaIGC	0.579584	0.00589322	0.00674022	0.272727	genus
Firmicutes_Clostridia_Clostridiales_Eubacteriaceae_Eubacterium	NanoporeIGC_vs_IlluminaIGC	0.851948	0	0	0.969697	genus
Firmicutes_Clostridia_Clostridiales_Lachnospiraceae_Anaerostipes	NanoporeIGC_vs_IlluminaIGC	0.877565	1.74521e-07	5.1391e-07	0.484848	genus
Firmicutes_Clostridia_Clostridiales_Lachnospiraceae_Blautia	NanoporeIGC_vs_IlluminaIGC	0.945455	5.15284e-06	1.20233e-05	1	genus
Firmicutes_Clostridia_Clostridiales_Lachnospiraceae_Coprococcus	NanoporeIGC_vs_IlluminaIGC	0.876878	1.83539e-07	5.1391e-07	0.787879	genus
Firmicutes_Clostridia_Clostridiales_Lachnospiraceae_Dorea	NanoporeIGC_vs_IlluminaIGC	0.708672	0.000323321	0.000502944	0.878788	genus
Firmicutes_Clostridia_Clostridiales_Lachnospiraceae_Roseburia	NanoporeIGC_vs_IlluminaIGC	0.956804	1.20374e-11	1.12349e-10	0.818182	genus
Firmicutes_Clostridia_Clostridiales_Lachnospiraceae_unclassified Lachnospiraceae	NanoporeIGC_vs_IlluminaIGC	0.64311	0.00166221	0.00232709	0.606061	genus
Firmicutes_Clostridia_Clostridiales_Oscillospiraceae_Oscillibacter	NanoporeIGC_vs_IlluminaIGC	0.712532	0.000289684	0.000477126	0.242424	genus
Firmicutes_Clostridia_Clostridiales_Ruminococcaceae_Faecalibacterium	NanoporeIGC_vs_IlluminaIGC	0.930822	9.53037e-10	6.67126e-09	0.848485	genus
Firmicutes_Clostridia_Clostridiales_Ruminococcaceae_Ruminococcus	NanoporeIGC_vs_IlluminaIGC	0.897725	3.42681e-08	1.37072e-07	0.757576	genus
Firmicutes_Clostridia_Clostridiales_Ruminococcaceae_unclassified Ruminococcaceae	NanoporeIGC_vs_IlluminaIGC	0.770048	4.45115e-05	7.78952e-05	0.333333	genus
Firmicutes_Clostridia_Clostridiales_unclassified Clostridiales_unclassified Clostridiales	NanoporeIGC_vs_IlluminaIGC	0.803896	1.28669e-05	2.57339e-05	0.969697	genus
Firmicutes_Erysipelotrichia_Erysipelotrichales_Erysipelotrichaceae_Coprobacillus	NanoporeIGC_vs_IlluminaIGC	0.601207	0.00394348	0.00501898	0.242424	genus
Firmicutes_Erysipelotrichia_Erysipelotrichales_Erysipelotrichaceae_Holdemanella	NanoporeIGC_vs_IlluminaIGC	0.907282	1.40206e-08	6.54296e-08	0.272727	genus
Firmicutes_Negativicutes_Selenomonadales_Acidaminococcaceae_Phascolarctobacterium	NanoporeIGC_vs_IlluminaIGC	0.27696	0.224204	0.241451	0.212121	genus
Firmicutes_Negativicutes_Selenomonadales_Veillonellaceae_Dialister	NanoporeIGC_vs_IlluminaIGC	0.634629	0.00199964	0.00266619	0.272727	genus
Firmicutes_unclassified Firmicutes_unclassified Firmicutes_unclassified Firmicutes_unclassified Firmicutes	NanoporeIGC_vs_IlluminaIGC	0.856122	7.40899e-07	1.88592e-06	0.878788	genus
Proteobacteria_Betaproteobacteria_Burkholderiales_Sutterellaceae_Sutterella	NanoporeIGC_vs_IlluminaIGC	0.578414	0.00601806	0.00674022	0.272727	genus
unclassified_unclassified_unclassified_unclassified_unclassified	NanoporeIGC_vs_IlluminaIGC	0.212415	0.355272	0.36843	0.636364	genus
Actinobacteria_Actinobacteria_Bifidobacteriales_Bifidobacteriaceae_Bifidobacterium_Bifidobacterium adolescentis	NanoporeIGC_vs_IlluminaIGC	0.936657	4.22215e-10	2.81477e-09	0.606061	species
Actinobacteria_Actinobacteria_Bifidobacteriales_Bifidobacteriaceae_Bifidobacterium_Bifidobacterium bifidum	NanoporeIGC_vs_IlluminaIGC	0.812354	7.70931e-06	1.59503e-05	0.30303	species
Actinobacteria_Actinobacteria_Bifidobacteriales_Bifidobacteriaceae_Bifidobacterium_Bifidobacterium longum	NanoporeIGC_vs_IlluminaIGC	0.938954	2.99993e-10	2.38004e-09	0.575758	species
Bacteroidetes_Bacteroidia_Bacteroidales_Bacteroidaceae_Bacteroides_Bacteroides ovatus	NanoporeIGC_vs_IlluminaIGC	0.833454	2.70968e-06	6.77419e-06	0.363636	species
Bacteroidetes_Bacteroidia_Bacteroidales_Bacteroidaceae_Bacteroides_Bacteroides uniformis	NanoporeIGC_vs_IlluminaIGC	0.956317	1.33647e-11	2.0047e-10	0.636364	species
Bacteroidetes_Bacteroidia_Bacteroidales_Bacteroidaceae_Bacteroides_Bacteroides vulgatus	NanoporeIGC_vs_IlluminaIGC	0.912241	8.48355e-09	3.91279e-08	0.727273	species
Bacteroidetes_Bacteroidia_Bacteroidales_Porphyromonadaceae_Parabacteroides_Parabacteroides distasonis	NanoporeIGC_vs_IlluminaIGC	0.700694	0.000403568	0.000620874	0.242424	species
Bacteroidetes_Bacteroidia_Bacteroidales_Porphyromonadaceae_Parabacteroides_Parabacteroides merdae	NanoporeIGC_vs_IlluminaIGC	0.530745	0.0133089	0.0137678	0.212121	species
Bacteroidetes_Bacteroidia_Bacteroidales_Prevotellaceae_Prevotella_Prevotella copri	NanoporeIGC_vs_IlluminaIGC	0.948442	6.25709e-11	7.50851e-10	0.242424	species
Bacteroidetes_Bacteroidia_Bacteroidales_Rikenellaceae_Alistipes_Alistipes onderdonkii	NanoporeIGC_vs_IlluminaIGC	0.761259	6.12306e-05	0.000108054	0.212121	species
Bacteroidetes_Bacteroidia_Bacteroidales_Rikenellaceae_Alistipes_Alistipes putredinis	NanoporeIGC_vs_IlluminaIGC	0.793793	1.74743e-05	3.49486e-05	0.363636	species
Bacteroidetes_Bacteroidia_Bacteroidales_unclassified Bacteroidales_unclassified Bacteroidales_unclassified Bacteroidales	NanoporeIGC_vs_IlluminaIGC	-0.0579634	0.802923	0.802923	0.242424	species
Firmicutes_Bacilli_Lactobacillales_Streptococcaceae_Streptococcus_Streptococcus thermophilus	NanoporeIGC_vs_IlluminaIGC	0.77105	4.28849e-05	7.79726e-05	0.30303	species
Firmicutes_Clostridia_Clostridiales_Clostridiaceae_Clostridium_unclassified Clostridium	NanoporeIGC_vs_IlluminaIGC	0.577885	0.00607526	0.00662756	0.212121	species
Firmicutes_Clostridia_Clostridiales_Eubacteriaceae_Eubacterium_Eubacterium hallii	NanoporeIGC_vs_IlluminaIGC	0.693867	0.000485217	0.000710074	0.666667	species
Firmicutes_Clostridia_Clostridiales_Eubacteriaceae_Eubacterium_Eubacterium ramulus	NanoporeIGC_vs_IlluminaIGC	0.612909	0.00313544	0.00357589	0.212121	species
Firmicutes_Clostridia_Clostridiales_Eubacteriaceae_Eubacterium_Eubacterium rectale	NanoporeIGC_vs_IlluminaIGC	0.970092	3.85811e-13	2.31487e-11	0.818182	species
Firmicutes_Clostridia_Clostridiales_Eubacteriaceae_Eubacterium_Eubacterium sp. CAG:38	NanoporeIGC_vs_IlluminaIGC	0.747984	9.67255e-05	0.000161209	0.242424	species
Firmicutes_Clostridia_Clostridiales_Eubacteriaceae_Eubacterium_Eubacterium sp. CAG:76	NanoporeIGC_vs_IlluminaIGC	0.69154	0.000516097	0.000737281	0.242424	species
Firmicutes_Clostridia_Clostridiales_Eubacteriaceae_Eubacterium_unclassified Eubacterium	NanoporeIGC_vs_IlluminaIGC	0.661037	0.00110407	0.0014721	0.242424	species
Firmicutes_Clostridia_Clostridiales_Lachnospiraceae_Anaerostipes_Anaerostipes hadrus	NanoporeIGC_vs_IlluminaIGC	0.881688	1.28162e-07	4.27208e-07	0.484848	species
Firmicutes_Clostridia_Clostridiales_Lachnospiraceae_Blautia_Blautia sp. CAG:37	NanoporeIGC_vs_IlluminaIGC	0.945218	1.09928e-10	1.09928e-09	0.69697	species
Firmicutes_Clostridia_Clostridiales_Lachnospiraceae_Blautia_Blautia sp. CAG:52	NanoporeIGC_vs_IlluminaIGC	0.784906	2.51318e-05	4.86421e-05	0.363636	species
Firmicutes_Clostridia_Clostridiales_Lachnospiraceae_Blautia_Blautia sp. KLE 1732	NanoporeIGC_vs_IlluminaIGC	0.938582	3.17339e-10	2.38004e-09	0.818182	species
Firmicutes_Clostridia_Clostridiales_Lachnospiraceae_Blautia_Blautia wexlerae	NanoporeIGC_vs_IlluminaIGC	0.884416	1.68815e-06	4.60405e-06	0.969697	species
Firmicutes_Clostridia_Clostridiales_Lachnospiraceae_Blautia_Ruminococcus gnavus	NanoporeIGC_vs_IlluminaIGC	0.683734	0.000632229	0.000882181	0.212121	species
Firmicutes_Clostridia_Clostridiales_Lachnospiraceae_Blautia_Ruminococcus obeum	NanoporeIGC_vs_IlluminaIGC	0.69516	0.000468762	0.000703143	0.30303	species
Firmicutes_Clostridia_Clostridiales_Lachnospiraceae_Blautia_Ruminococcus sp. CAG:17	NanoporeIGC_vs_IlluminaIGC	0.657481	0.00119991	0.0015651	0.272727	species
Firmicutes_Clostridia_Clostridiales_Lachnospiraceae_Blautia_Ruminococcus torques 1	NanoporeIGC_vs_IlluminaIGC	0.741301	0.000120514	0.000190286	0.333333	species
Firmicutes_Clostridia_Clostridiales_Lachnospiraceae_Blautia_Ruminococcus torques 2	NanoporeIGC_vs_IlluminaIGC	0.914245	6.86704e-09	3.74566e-08	0.545455	species
Firmicutes_Clostridia_Clostridiales_Lachnospiraceae_Blautia_unclassified Blautia	NanoporeIGC_vs_IlluminaIGC	0.641435	0.00172473	0.00215592	0.272727	species
Firmicutes_Clostridia_Clostridiales_Lachnospiraceae_Coprococcus_Coprococcus comes	NanoporeIGC_vs_IlluminaIGC	0.895331	4.22836e-08	1.58563e-07	0.575758	species
Firmicutes_Clostridia_Clostridiales_Lachnospiraceae_Dorea_Dorea formicigenerans	NanoporeIGC_vs_IlluminaIGC	0.533021	0.0128463	0.0135224	0.333333	species
Firmicutes_Clostridia_Clostridiales_Lachnospiraceae_Dorea_Dorea longicatena 1	NanoporeIGC_vs_IlluminaIGC	0.854922	7.97831e-07	2.39349e-06	0.69697	species
Firmicutes_Clostridia_Clostridiales_Lachnospiraceae_Dorea_Dorea longicatena 2	NanoporeIGC_vs_IlluminaIGC	0.892593	5.34444e-08	1.88627e-07	0.30303	species
Firmicutes_Clostridia_Clostridiales_Lachnospiraceae_Roseburia_Roseburia intestinalis	NanoporeIGC_vs_IlluminaIGC	0.830764	3.12021e-06	7.48849e-06	0.363636	species
Firmicutes_Clostridia_Clostridiales_Lachnospiraceae_Roseburia_Roseburia inulinivorans	NanoporeIGC_vs_IlluminaIGC	0.775725	3.59587e-05	6.74225e-05	0.393939	species
Firmicutes_Clostridia_Clostridiales_Lachnospiraceae_Roseburia_Roseburia sp. CAG:18	NanoporeIGC_vs_IlluminaIGC	0.965774	1.36596e-12	3.55556e-11	0.636364	species
Firmicutes_Clostridia_Clostridiales_Lachnospiraceae_unclassified Lachnospiraceae_unclassified Lachnospiraceae	NanoporeIGC_vs_IlluminaIGC	0.607716	0.00347508	0.0038612	0.606061	species
Firmicutes_Clostridia_Clostridiales_Ruminococcaceae_Faecalibacterium_Faecalibacterium 1	NanoporeIGC_vs_IlluminaIGC	0.918899	4.11705e-09	2.47023e-08	0.424242	species
Firmicutes_Clostridia_Clostridiales_Ruminococcaceae_Faecalibacterium_Faecalibacterium 2	NanoporeIGC_vs_IlluminaIGC	0.813794	7.20853e-06	1.54469e-05	0.515152	species
Firmicutes_Clostridia_Clostridiales_Ruminococcaceae_Faecalibacterium_Faecalibacterium 3	NanoporeIGC_vs_IlluminaIGC	0.9133	7.59185e-09	3.79593e-08	0.424242	species
Firmicutes_Clostridia_Clostridiales_Ruminococcaceae_Faecalibacterium_Faecalibacterium 4	NanoporeIGC_vs_IlluminaIGC	0.89946	2.93305e-08	1.17322e-07	0.333333	species
Firmicutes_Clostridia_Clostridiales_Ruminococcaceae_Faecalibacterium_Faecalibacterium 6	NanoporeIGC_vs_IlluminaIGC	0.64728	0.00151477	0.00193375	0.212121	species
Firmicutes_Clostridia_Clostridiales_Ruminococcaceae_Faecalibacterium_Faecalibacterium 8 (Ruminococcus sp. CAG:330)	NanoporeIGC_vs_IlluminaIGC	0.911534	9.12984e-09	3.91279e-08	0.454545	species
Firmicutes_Clostridia_Clostridiales_Ruminococcaceae_Faecalibacterium_unclassified Faecalibacterium	NanoporeIGC_vs_IlluminaIGC	0.814955	6.82566e-06	1.51681e-05	0.636364	species
Firmicutes_Clostridia_Clostridiales_Ruminococcaceae_Ruminococcus_Ruminococcus bicirculans	NanoporeIGC_vs_IlluminaIGC	0.8682	3.38385e-07	1.06858e-06	0.30303	species
Firmicutes_Clostridia_Clostridiales_Ruminococcaceae_Ruminococcus_Ruminococcus bromii	NanoporeIGC_vs_IlluminaIGC	0.964797	1.77778e-12	3.55556e-11	0.515152	species
Firmicutes_Clostridia_Clostridiales_Ruminococcaceae_Ruminococcus_Ruminococcus sp. CAG:254	NanoporeIGC_vs_IlluminaIGC	0.848758	1.15504e-06	3.30013e-06	0.212121	species
Firmicutes_Clostridia_Clostridiales_Ruminococcaceae_Ruminococcus_unclassified Ruminococcus	NanoporeIGC_vs_IlluminaIGC	0.677863	0.000733621	0.00100039	0.424242	species
Firmicutes_Clostridia_Clostridiales_Ruminococcaceae_unclassified Ruminococcaceae_Ruminococcaceae bacterium LM158	NanoporeIGC_vs_IlluminaIGC	0.74464	0.000108065	0.000175241	0.242424	species
Firmicutes_Clostridia_Clostridiales_unclassified Clostridiales_unclassified Clostridiales_Clostridium sp. CAG:7	NanoporeIGC_vs_IlluminaIGC	0.613799	0.00308016	0.00357589	0.212121	species
Firmicutes_Clostridia_Clostridiales_unclassified Clostridiales_unclassified Clostridiales_unclassified Clostridiales	NanoporeIGC_vs_IlluminaIGC	0.612539	0.00315871	0.00357589	0.666667	species
Firmicutes_Erysipelotrichia_Erysipelotrichales_Erysipelotrichaceae_Coprobacillus_Coprobacillus sp. CAG:235	NanoporeIGC_vs_IlluminaIGC	0.554468	0.00909477	0.0097444	0.212121	species
Firmicutes_unclassified Firmicutes_unclassified Firmicutes_unclassified Firmicutes_unclassified Firmicutes_Firmicutes bacterium CAG:270	NanoporeIGC_vs_IlluminaIGC	0.759488	6.51879e-05	0.000111751	0.242424	species
Firmicutes_unclassified Firmicutes_unclassified Firmicutes_unclassified Firmicutes_unclassified Firmicutes_Firmicutes bacterium CAG:41	NanoporeIGC_vs_IlluminaIGC	0.614341	0.00304683	0.00357589	0.242424	species
Firmicutes_unclassified Firmicutes_unclassified Firmicutes_unclassified Firmicutes_unclassified Firmicutes_Firmicutes bacterium CAG:56	NanoporeIGC_vs_IlluminaIGC	0.817622	6.01256e-06	1.38751e-05	0.272727	species
Firmicutes_unclassified Firmicutes_unclassified Firmicutes_unclassified Firmicutes_unclassified Firmicutes_Firmicutes bacterium CAG:65	NanoporeIGC_vs_IlluminaIGC	0.629656	0.00222303	0.00272208	0.212121	species
Firmicutes_unclassified Firmicutes_unclassified Firmicutes_unclassified Firmicutes_unclassified Firmicutes_unclassified Firmicutes	NanoporeIGC_vs_IlluminaIGC	0.83447	2.5674e-06	6.69757e-06	0.575758	species
unclassified_unclassified_unclassified_unclassified_unclassified_unclassified	NanoporeIGC_vs_IlluminaIGC	0.212415	0.355272	0.361293	0.636364	species
